# Supplementary material for: Balanced estimate and uncertainty assessment of European climatechange using the large EURO-CORDEX regional climate modelensemble
Source: Copernicus journal article supplement (doi:10.5194/esd-2021-8), 2021-03-08
Supplement: Supplementary file 1 [file esd-2021-8-supplement.pdf]

# **Supplement to: Balanced estimate and uncertainty assessment of European climate change using the large EURO-CORDEX regional climate model ensemble**

Guillaume Evin<sup>1</sup>, Samuel Somot<sup>2</sup>, and Benoit Hingray<sup>3</sup>

<sup>1</sup>Univ. Grenoble Alpes, INRAE, UR ETGR, Grenoble, France

<sup>2</sup>CNRM, Université de Toulouse, Météo-France, CNRS, Toulouse, France, 42 avenue Coriolis 31057 Toulouse, France

<sup>3</sup>Univ. Grenoble Alpes, CNRS, IRD, Grenoble INP, IGE, Grenoble, France

**Correspondence:** Guillaume Evin ([guillaume.evin@inrae.fr](mailto:guillaume.evin@inrae.fr))

# 1 Characteristics of the scenarios

**Table S1.** Characteristics of the scenarios of the EURO-CORDEX climate projection ensemble.

| RCP   | GCM          | Member  | RCM          | Version |
|-------|--------------|---------|--------------|---------|
| rcp85 | CanESM2      | r11p1   | CCLM4-8-17   | v1      |
| rcp85 | CanESM2      | r11p1   | REMO         | v1      |
| rcp26 | CNRM-CM5     | r11p1   | ALADIN53     | v1      |
| rcp45 | CNRM-CM5     | r11p1   | ALADIN53     | v1      |
| rcp85 | CNRM-CM5     | r11p1   | ALADIN53     | v1      |
| rcp26 | CNRM-CM5     | r11p1   | ALADIN63     | v2      |
| rcp45 | CNRM-CM5     | r11p1   | ALADIN63     | v2      |
| rcp85 | CNRM-CM5     | r11p1   | ALADIN63     | v2      |
| rcp26 | CNRM-CM5     | r11p1   | ALARO-0      | v1      |
| rcp45 | CNRM-CM5     | r11p1   | ALARO-0      | v1      |
| rcp85 | CNRM-CM5     | r11p1   | ALARO-0      | v1      |
| rcp45 | CNRM-CM5     | r11p1   | CCLM4-8-17   | v1      |
| rcp85 | CNRM-CM5     | r11p1   | CCLM4-8-17   | v1      |
| rcp85 | CNRM-CM5     | r11p1   | HIRHAM5      | v2      |
| rcp26 | CNRM-CM5     | r11p1   | RACMO22E     | v2      |
| rcp45 | CNRM-CM5     | r11p1   | RACMO22E     | v2      |
| rcp85 | CNRM-CM5     | r11p1   | RACMO22E     | v2      |
| rcp45 | CNRM-CM5     | r11p1   | RCA4         | v1      |
| rcp85 | CNRM-CM5     | r11p1   | RCA4         | v1      |
| rcp85 | CNRM-CM5     | r11p1   | REMO         | v1      |
| rcp85 | CNRM-CM5     | r11p1   | WRF381P      | v2      |
| rcp26 | EC-EARTH     | r12i1p1 | CCLM4-8-17   | v1      |
| rcp45 | EC-EARTH     | r12i1p1 | CCLM4-8-17   | v1      |
| rcp85 | EC-EARTH     | r12i1p1 | CCLM4-8-17   | v1      |
| rcp85 | EC-EARTH     | r12i1p1 | HIRHAM5      | v1      |
| rcp26 | EC-EARTH     | r12i1p1 | RACMO22E     | v1      |
| rcp45 | EC-EARTH     | r12i1p1 | RACMO22E     | v1      |
| rcp85 | EC-EARTH     | r12i1p1 | RACMO22E     | v1      |
| rcp26 | EC-EARTH     | r12i1p1 | RCA4         | v1      |
| rcp45 | EC-EARTH     | r12i1p1 | RCA4         | v1      |
| rcp85 | EC-EARTH     | r12i1p1 | RCA4         | v1      |
| rcp26 | EC-EARTH     | r12i1p1 | REMO         | v1      |
| rcp85 | EC-EARTH     | r12i1p1 | REMO         | v1      |
| rcp85 | EC-EARTH     | r12i1p1 | WRF361H      | v1      |
| rcp26 | GFDL-ESM2G   | r11p1   | REMO         | v1      |
| rcp85 | HadGEM2-ES   | r11p1   | ALADIN63     | v1      |
| rcp45 | HadGEM2-ES   | r11p1   | CCLM4-8-17   | v1      |
| rcp85 | HadGEM2-ES   | r11p1   | CCLM4-8-17   | v1      |
| rcp85 | HadGEM2-ES   | r11p1   | HadREM3-GA7  | v1      |
| rcp45 | HadGEM2-ES   | r11p1   | HIRHAM5      | v2      |
| rcp85 | HadGEM2-ES   | r11p1   | HIRHAM5      | v2      |
| rcp26 | HadGEM2-ES   | r11p1   | RACMO22E     | v2      |
| rcp45 | HadGEM2-ES   | r11p1   | RACMO22E     | v2      |
| rcp85 | HadGEM2-ES   | r11p1   | RACMO22E     | v2      |
| rcp26 | HadGEM2-ES   | r11p1   | RCA4         | v1      |
| rcp45 | HadGEM2-ES   | r11p1   | RCA4         | v1      |
| rcp85 | HadGEM2-ES   | r11p1   | RCA4         | v1      |
| rcp26 | HadGEM2-ES   | r11p1   | RegCM4-6     | v1      |
| rcp85 | HadGEM2-ES   | r11p1   | RegCM4-6     | v1      |
| rcp26 | HadGEM2-ES   | r11p1   | REMO         | v1      |
| rcp85 | HadGEM2-ES   | r11p1   | REMO         | v1      |
| rcp85 | HadGEM2-ES   | r11p1   | WRF361H      | v1      |
| rcp85 | HadGEM2-ES   | r11p1   | WRF381P      | v1      |
| rcp85 | IPSL-CM5A-MR | r11p1   | RACMO22E     | v1      |
| rcp45 | IPSL-CM5A-MR | r11p1   | RCA4         | v1      |
| rcp85 | IPSL-CM5A-MR | r11p1   | RCA4         | v1      |
| rcp45 | IPSL-CM5A-MR | r11p1   | WRF381P      | v1      |
| rcp85 | IPSL-CM5A-MR | r11p1   | WRF381P      | v1      |
| rcp26 | MIROC5       | r11p1   | CCLM4-8-17   | v1      |
| rcp85 | MIROC5       | r11p1   | CCLM4-8-17   | v1      |
| rcp26 | MIROC5       | r11p1   | REMO         | v1      |
| rcp85 | MIROC5       | r11p1   | REMO         | v1      |
| rcp85 | MIROC5       | r11p1   | WRF361H      | v1      |
| rcp26 | MPI-ESM-LR   | r11p1   | CCLM4-8-17   | v1      |
| rcp45 | MPI-ESM-LR   | r11p1   | CCLM4-8-17   | v1      |
| rcp85 | MPI-ESM-LR   | r11p1   | CCLM4-8-17   | v1      |
| rcp85 | MPI-ESM-LR   | r11p1   | COSMO-crCLIM | v1      |
| rcp85 | MPI-ESM-LR   | r11p1   | HIRHAM5      | v1      |
| rcp85 | MPI-ESM-LR   | r11p1   | RACMO22E     | v1      |
| rcp26 | MPI-ESM-LR   | r11p1   | RCA4         | v1a     |
| rcp45 | MPI-ESM-LR   | r11p1   | RCA4         | v1a     |
| rcp85 | MPI-ESM-LR   | r11p1   | RCA4         | v1a     |
| rcp85 | MPI-ESM-LR   | r11p1   | RegCM4-6     | v1      |
| rcp26 | MPI-ESM-LR   | r11p1   | REMO         | v1      |
| rcp45 | MPI-ESM-LR   | r11p1   | REMO         | v1      |
| rcp85 | MPI-ESM-LR   | r11p1   | REMO         | v1      |
| rcp26 | MPI-ESM-LR   | r11p1   | WRF361H      | v1      |
| rcp85 | MPI-ESM-LR   | r11p1   | WRF361H      | v1      |
| rcp85 | NorESM1-M    | r11p1   | COSMO-crCLIM | v1      |
| rcp45 | NorESM1-M    | r11p1   | HIRHAM5      | v2      |
| rcp85 | NorESM1-M    | r11p1   | HIRHAM5      | v2      |
| rcp85 | NorESM1-M    | r11p1   | RACMO22E     | v1      |
| rcp26 | NorESM1-M    | r11p1   | RCA4         | v1      |
| rcp85 | NorESM1-M    | r11p1   | RCA4         | v1      |
| rcp26 | NorESM1-M    | r11p1   | REMO         | v1      |
| rcp85 | NorESM1-M    | r11p1   | REMO         | v1      |
| rcp85 | NorESM1-M    | r11p1   | WRF381P      | v1      |

## 2 Detailed description of the QUALYPSO method

In the QUALYPSO approach, each climate projection is decomposed into a smooth signal (the climate response) and a noise (internal variability). This so-called "time-series" approach (Hawkins and Sutton, 2009; Hingray and Saïd, 2014) first consists in extracting the climate response of each climate experiment from the raw projection. In QUALYPSO, cubic smoothing splines are used to extract the climate response for each simulation chain. Deviations from these climate responses are considered to be the result of internal variability. For each chain, the climate change response function is obtained from the differences between the climate responses obtained for different future periods and a reference period. The ensemble of climate change responses obtained for the different chains is used to assess the grand ensemble mean of projected changes and associated uncertainties. For further details on the method, we refer the reader to Evin et al. (2019). The four sequential steps can be summarized as follows:

1. The first step is related to the extraction of the climate responses and the estimation of the internal variability.
2. The second step is related to the computation of the climate change responses (i.e. anomalies).
3. The third step is an ANalysis Of VAriance (ANOVA): the ensemble of climate change responses is decomposed using an additive model composed of a grand mean and main effects.
4. The fourth step further decomposes the remaining variability into interaction effects and residual variability.

In this study, we consider an ensemble of simulation chains where each chain corresponds to a given GCM/RCM combination for a given emission scenario (RCP). For a RCM  $i$ , GCM  $j$  and scenario  $k$ ,  $Y_{i,j,k}(t)$  denotes the raw climate projections of the climate variable (temperature, precipitation) for a given time  $t$ . The EURO-CORDEX climate projection ensemble described in Table S1 is made of  $n_o = 87$  experiments corresponding to different simulation chains. The number of available experiments is smaller than the total number of possible climate "experiments" (denoted by  $n$ ), that would correspond to all possible combinations of the different scenarios/models considered here. In this study, there are  $n = 351$  possible combinations ( $I = 13$  different RCMs times  $J = 9$  different GCMs times  $K = 3$  different RCPs), and  $n_m = 264$  combinations are thus missing.

### 2.1 Step 1: Extraction of the climate responses

For each simulation chain, the raw climate projections  $Y_{i,j,k}(t)$  can be expressed as:

$$Y_{i,j,k}(t) = \phi_{i,j,k}(t) + \eta_{i,j,k}(t), \tag{S1}$$

where  $\phi_{i,j,k}(t)$  is the climate response for this simulation chain and  $\eta_{i,j,k}(t)$  is the deviation from the climate response, as a result of internal variability. In this paper, the climate response  $\phi_{i,j,k}(t)$  is obtained by fitting a cubic spline to the time series  $Y_{i,j,k}(t)$  (Evin et al., 2019).

## 2.2 Step 2: Computation of the change variables

As in most climate impact studies, uncertainty sources are quantified from change variables, obtained as differences between a future and a reference period. The change variable can be defined in terms of absolute changes  $Y_{i,j,k}^*(t) = Y_{i,j,k}(t) - \phi_{i,j,k}(c)$  (e.g. for temperature), or in terms of relative changes  $Y_{i,j,k}^*(t) = Y_{i,j,k}(t)/\phi_{i,j,k}(c) - 1$  (e.g. for precipitation), where  $\phi_{i,j,k}(c)$  is the value of the climate response for the reference period  $c = 1981 - 2010$ . In both cases, the change variable  $Y_{i,j,k}^*(t)$  can be split up into  $Y_{i,j,k}^*(t) = \phi_{i,j,k}^*(t) + \eta_{i,j,k}^*(t)$  where  $\phi_{i,j,k}^*(t)$  is the climate change response for this simulation chain and time  $t$ , and  $\eta_{i,j,k}^*(t)$  is the deviation from the climate change response, as a result of internal variability.

## 2.3 Step 3: Decomposition of the climate change responses

This study aims at applying an ANOVA decomposition to the climate change response  $\phi_{i,j,k}^*(t)$  in order to obtain the part of its variability corresponding to the different components (RCMs, GCMs, etc.). In QUALYPSO, the climate change response is expressed as the sum of the grand mean, the main effects, and a residual term, i.e.:

$$\phi_{i,j,k}^*(t) = \mu(t) + \alpha_i(t) + \beta_j(t) + \gamma_k(t) + \xi_{i,j,k}(t), \quad (\text{S2})$$

where

- $\mu(t)$  is the ensemble mean climate change response, shared by all simulation chains,
- $\alpha_i(t)$ ,  $\beta_j(t)$  and  $\gamma_k(t)$  are the main effects corresponding to the type of RCM, GCM and emission scenario, respectively,
- $\xi_{i,j,k}(t) = \phi_{i,j,k}^*(t) - \mu(t) - \alpha_i(t) - \beta_j(t) - \gamma_k(t)$  is a residual term which represents the part of the climate change response that cannot be explained by the sum of the ensemble mean and the main effects.

The QUALYPSO approach (Evin et al., 2019) consists in estimating the different terms of Eq. S2 (grand mean  $\mu(t)$  and the main effects  $\alpha_i(t)$ ,  $\beta_j(t)$  and  $\gamma_k(t)$ ) using a Bayesian framework and data augmentation. Missing climate projections are part of the inference and the posterior distributions of all unknown quantities (grand mean, main effects and missing climate projections) are sampled sequentially using the Gibbs algorithm. In this study, the mean of the posterior distributions are taken as estimates and are denoted by  $\hat{\mu}(t)$  for the grand mean, and  $\hat{\alpha}_i(t)$ ,  $\hat{\beta}_j(t)$  and  $\hat{\gamma}_k(t)$  for the main effects. The mean expected change  $BM_k$  for each scenario  $k$  and time  $t$  is the sum of the ensemble mean climate change response  $\hat{\mu}(t)$  and the scenario effect:

$$BM_k = \hat{\mu}(t) + \hat{\gamma}_k(t). \quad (\text{S3})$$

## 2.4 Step 4: Residual variability and interaction effects

The residual term  $\xi_{i,j,k}(t)$  in Eq. (S2) characterizes the part of the climate change response which is not the result of a systematic effect of RCM and GCM models, or of the emission scenario (so-called main effects). This variability can be due to

interactions between the emission scenarios and the climate models (RCP/GCM, RCP/RCM) or between the climate models  
 60 (GCM/RCM). For complete ensembles, these interactions can be estimated using all simulation chains corresponding to a  
 specific combination (see, e.g. Déqué et al., 2007; Yip et al., 2011). The last remaining variability is related to interactions  
 RCM/GCM/RCP, which can be estimated using different replicates of the simulation chains (Yip et al., 2011) or by making  
 additional assumptions, e.g. by considering residual terms corresponding to successive years as replicates (Christensen and  
 Kjellström, 2020). Northrop and Chandler (2014) note that direct estimates of these interactions are often biased. In our case,  
 65 only one member of each simulation chain is available, and the QUALYPSO approach cannot be considered to estimate the  
 very large number of possible interaction effects. For example, the data augmentation approach would consist in estimating  
 $I \times J = 117$  additional terms for GCM/RCM interactions, which is not feasible considering that only  $n_o = 87$  simulation chains  
 are available.

In this study, we assess the variability related to the three types of interactions (RCM/GCM, RCM/RCP, GCM/RCP) by  
 70 applying an additional decomposition of residual terms  $\xi_{i,j,k}(t)$ . The remaining variability (interactions RCM/GCM/RCP) is  
 considered as the residual variability. Heuristic estimates of interaction effects and residual variability are obtained as follows:

- For all available simulation chains, we first obtain residual terms as

$$\hat{\xi}_{i,j,k}(t) = \phi_{i,j,k}^*(t) - \hat{\mu}(t) - \hat{\alpha}_i(t) - \hat{\beta}_j(t) - \hat{\gamma}_k(t).$$

- When at least  $K_{ij} = 2$  simulation chains are available for a RCM  $i$  and a GCM  $j$  (i.e. at least for two emission scenarios),  
 the interaction effect is estimated by

$$\hat{\kappa}_{ij}(t) = \frac{1}{K_{ij}} \sum_{k=1}^{K_{ij}} \hat{\xi}_{i,j,k}(t)^2.$$

We can thus estimate  $n_{IJ} = 27$  RCM /GCM interaction effects corresponding to different combinations of RCM and  
 GCM models. Similarly, we estimate  $n_{IK} = 18$  RCM /RCP interaction effects  $\hat{\psi}_{ik}(t)$  and  $n_{JK} = 19$  GCM /RCP in-  
 teraction effects  $\hat{\omega}_{jk}(t)$ . If only one simulation chain is available, the interaction effect is not estimated and is set to  
 75 zero.

- Finally, remaining residual terms are obtained as

$$\hat{\nu}_{i,j,k}(t) = \hat{\xi}_{i,j,k}^*(t) - \hat{\kappa}_{ij}(t) - \hat{\psi}_{ik}(t) - \hat{\omega}_{jk}(t).$$

It must be acknowledged that these estimates of interaction effects suffer from several limitations. First, these estimates rely  
 on a few simulation chains. Second, we can only estimate a small proportion of all possible interactions (for example  $n_{IJ} = 27$   
 RCM /GCM interaction effects among the  $I \times J = 117$  possible GCM/RCM combinations). However, it provides an interesting  
 approximation of the magnitude of these interactions relatively to the other ones.

## 80 2.5 Total variance and variance components

In this study, we aim at characterizing the total variance and its decomposition as a function of time. For each time  $t$ , since  
 $Y_{i,j,k}^*(t) = \phi_{i,j,k}^*(t) + \eta_{i,j,k}^*(t)$ , if  $\phi_{i,j,k}^*(t)$  and  $\eta_{i,j,k}^*(t)$  are assumed to be independent, the total variance of the change variable

$Y_{i,j,k}^*(t)$  is:

$$\text{Var}[Y_{i,j,k}^*(t)] = \text{Var}[\phi_{i,j,k}^*(t)] + \text{Var}[\eta_{i,j,k}^*(t)], \quad (\text{S4})$$

85 where  $\text{Var}[\phi_{i,j,k}^*(t)]$  is the total variance related to the climate change response and  $\text{Var}[\eta_{i,j,k}^*(t)]$  characterizes the internal variability of the change variable. Internal variability  $\text{Var}[\eta_{i,j,k}^*(t)]$  is considered constant and does not depend on time (see Eq. S10 below).

The variance of the climate change response  $\phi_{i,j,k}^*(t)$ , for any given time  $t$ , is the sum of the variance of the different uncertainty components in Eq. (S2):

$$90 \quad \text{Var}[\phi_{i,j,k}^*(t)] = \text{Var}[\alpha_i(t)] + \text{Var}[\beta_j(t)] + \text{Var}[\gamma_k(t)] + \text{Var}[\xi_{i,j,k}], \quad (\text{S5})$$

where  $\text{Var}[\alpha_i(t)]$ ,  $\text{Var}[\beta_j(t)]$  and  $\text{Var}[\gamma_k(t)]$  describe the dispersion between the main RCM, GCM and RCP effects and are estimated by:

$$\widehat{\text{Var}}[\alpha_i(t)] = \frac{1}{I} \sum_i [\hat{\alpha}_i(t)]^2, \quad (\text{S6})$$

$$\widehat{\text{Var}}[\beta_j(t)] = \frac{1}{J} \sum_j [\hat{\beta}_j(t)]^2, \quad (\text{S7})$$

$$95 \quad \widehat{\text{Var}}[\gamma_k(t)] = \frac{1}{K} \sum_k [\hat{\gamma}_k(t)]^2. \quad (\text{S8})$$

The variability  $\text{Var}[\xi_{i,j,k}]$  (so-called residual variability in Evin et al., 2019) is estimated by

$$\widehat{\text{Var}}[\xi(t)] = \frac{1}{n_o} \sum_{\{i,j,k\}^o} \hat{\xi}_{i,j,k}(t)^2,$$

where  $\{i,j,k\}^o$  is the ensemble of available simulation chains. This variability will be further decompose below using estimates of interaction effects.

For each scenario  $k$  and time  $t$ , the following scenario-excluded uncertainty  $BU$  can be used to assess the uncertainty related to the mean expected change  $BM_k$ :

$$100 \quad BU = \sqrt{\widehat{\text{Var}}[Y_{i,j,k}^*(t)] - \widehat{\text{Var}}[\gamma_k(t)]}. \quad (\text{S9})$$

Finally, the variability  $\text{Var}[\xi_{i,j,k}]$  is the variability of the climate change response that cannot be explained by the variability of the main RCM, GCM and RCP effects. It is further decomposed into the uncertainty components  $\widehat{\text{Var}}[\kappa_{ij}(t)]$ ,  $\widehat{\text{Var}}[\psi_{ik}(t)]$ ,  $\widehat{\text{Var}}[\omega_{jk}(t)]$  corresponding to the interaction effects RCM/GCM, RCM/RCP and GCM/RCP respectively, and a residual variability  $\widehat{\text{Var}}[\nu(t)]$ :

$$\begin{aligned}
105 \quad \widehat{\text{Var}}[\kappa_{ij}(t)] &= C \times \text{var}[\hat{\kappa}_{ij}(t)], \\
\widehat{\text{Var}}[\psi_{ik}(t)] &= C \times \text{var}[\hat{\psi}_{ik}(t)], \\
\widehat{\text{Var}}[\omega_{jk}(t)] &= C \times \text{var}[\hat{\omega}_{jk}(t)], \\
\widehat{\text{Var}}[\nu(t)] &= C \times \text{var}[\hat{\nu}_{i,j,k}(t)],
\end{aligned}$$

where  $\text{var}$  is the standard empirical variance and  $C$  is a constant term that weights the different variance terms so that

110  $\widehat{\text{Var}}[\kappa_{ij}(t)] + \widehat{\text{Var}}[\psi_{ik}(t)] + \widehat{\text{Var}}[\omega_{jk}(t)] + \widehat{\text{Var}}[\nu(t)] = \widehat{\text{Var}}[\xi(t)]$ . This scaling is applied in order to preserve the variability  $\widehat{\text{Var}}[\xi_{i,j,k}]$  obtained with QUALYPSO. Indeed, due to the limitations in the estimates of the interaction effects (limited number of terms, unequal number of climate chains for each estimate, not centered on zero),  $C$  is generally less than one, and without this scaling, it would result to an inflation of the total uncertainty.

Internal variability of each climate chain corresponds to the variance of the deviations  $\eta_{i,j,k}^*(t)$  from the climate change

115 response, obtained for each simulation chain. The internal variability component of the ensemble is estimated as the multi-chain mean (over the  $n_o$  available chains) of the variances :

$$\widehat{\text{Var}}(\eta_{i,j,k}^*) = \frac{1}{n_o} \sum_{\{i,j,k\}^o} \frac{1}{n_t} \sum_t \eta_{i,j,k}^*(t)^2, \tag{S10}$$

where  $n_t$  corresponds to the length of the simulation chain. In Eq. (S10), internal variability is averaged over time and the resulting estimate  $\widehat{\text{Var}}(\eta_{i,j,k}^*)$  is thus considered constant. This assumption could be easily relaxed in case of evidences toward

120 an increase/decrease of the internal variability in the ensemble.

### 3 Interactions and residual variability

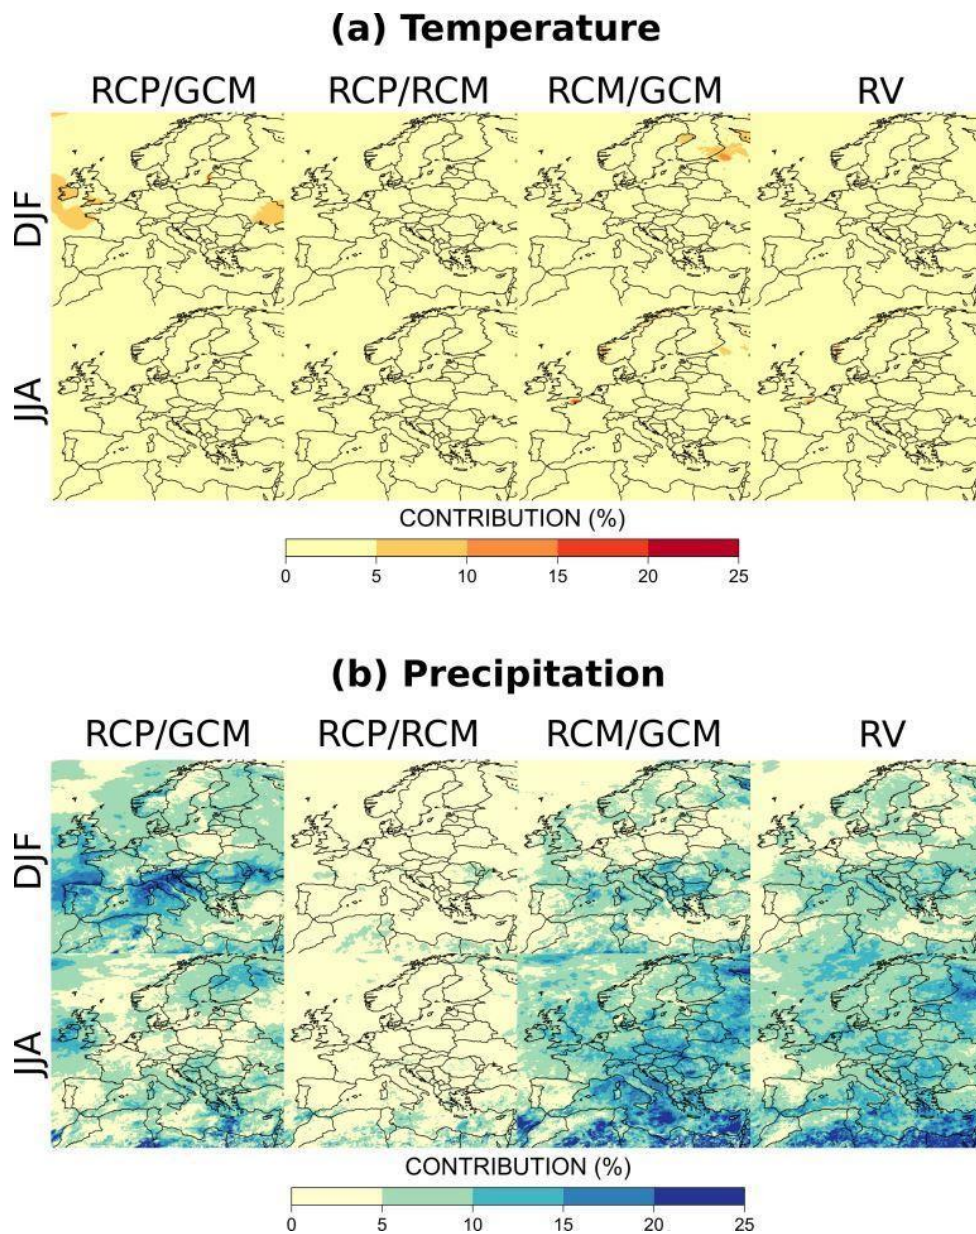

**Figure S1.** Fraction of total variance explained by interactions: RCP/GCM, RCP/RCM and RCM/GCM, and residual variability (RV) for (a) absolute temperature changes and (b) relative precipitation changes, at the end of the twenty-first century (2071-2099) compared to the period 1981-2010.



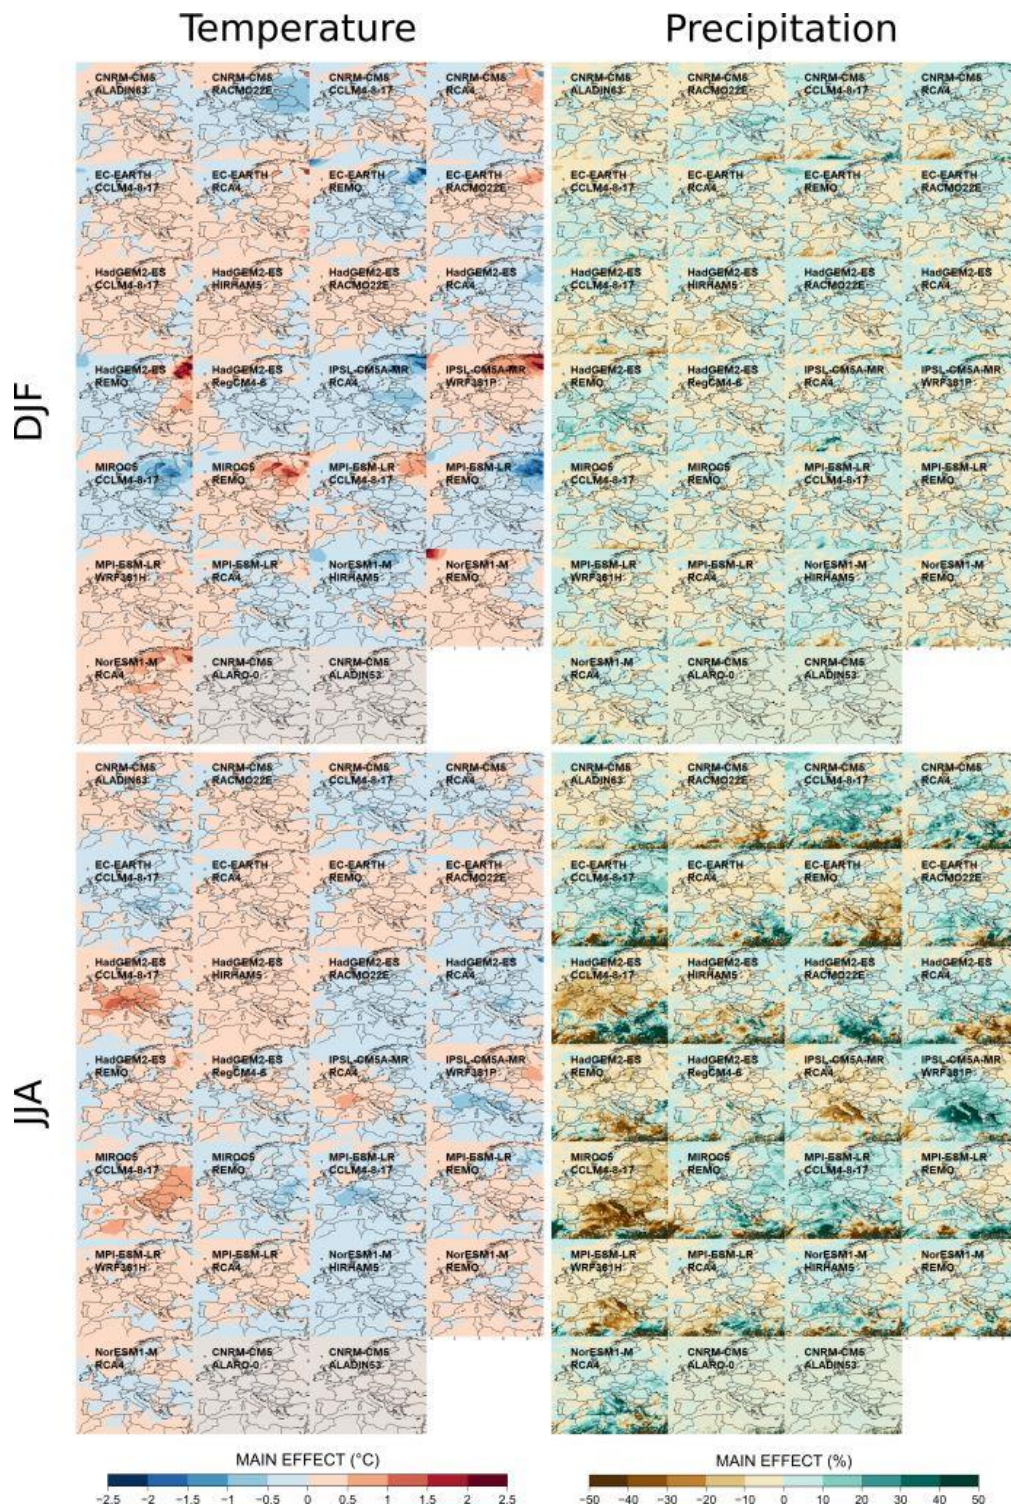

**Figure S2.** Estimated GCM/RCM interaction effects for absolute temperature (left) and relative precipitation changes (right) in winter (DJF) and summer (JJA), at the end of the twenty-first century (2071-2099) compared to the period 1981-2010.



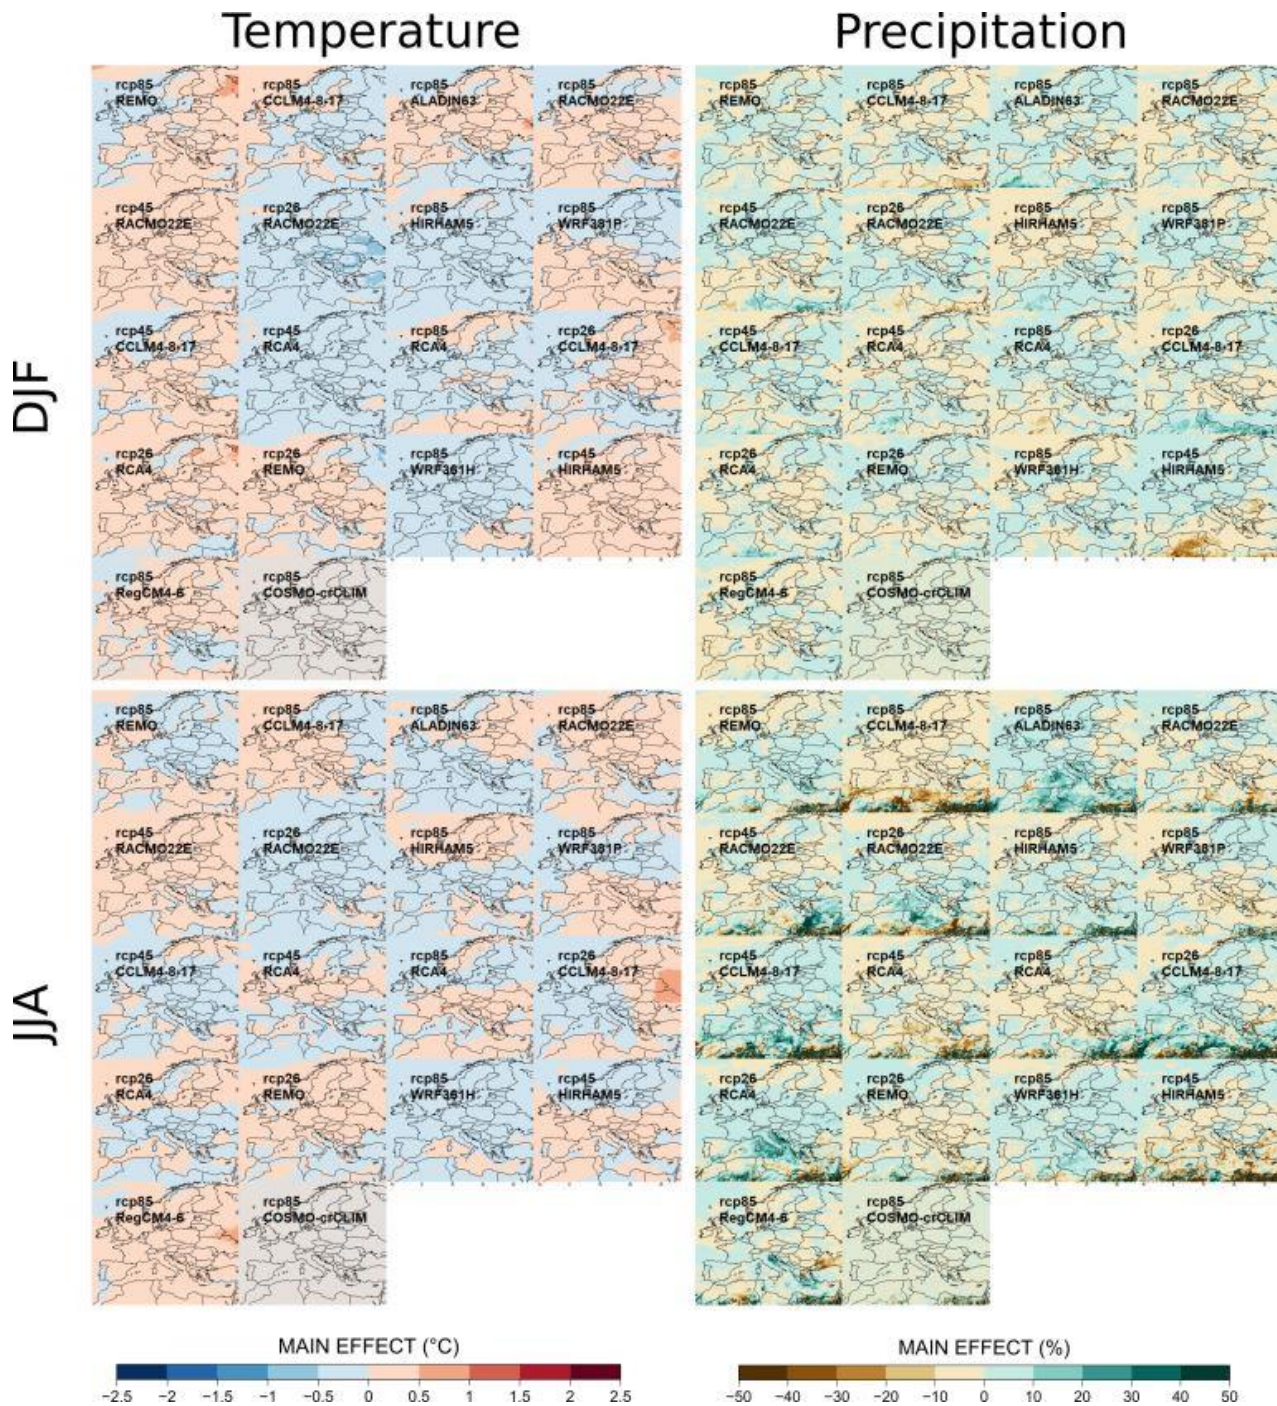

**Figure S3.** Estimated RCP/RCM interaction effects for absolute temperature (left) and relative precipitation changes (right) in winter (DJF) and summer (JJA), at the end of the twenty-first century (2071-2099) compared to the period 1981-2010.



# Temperature

# Precipitation

DJF

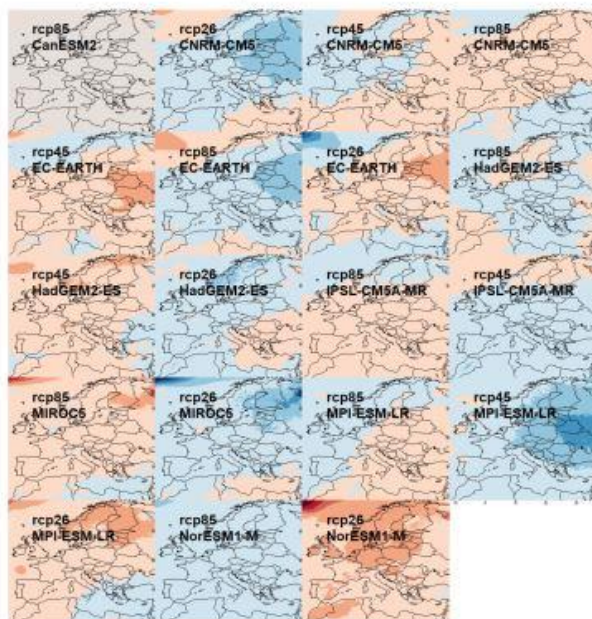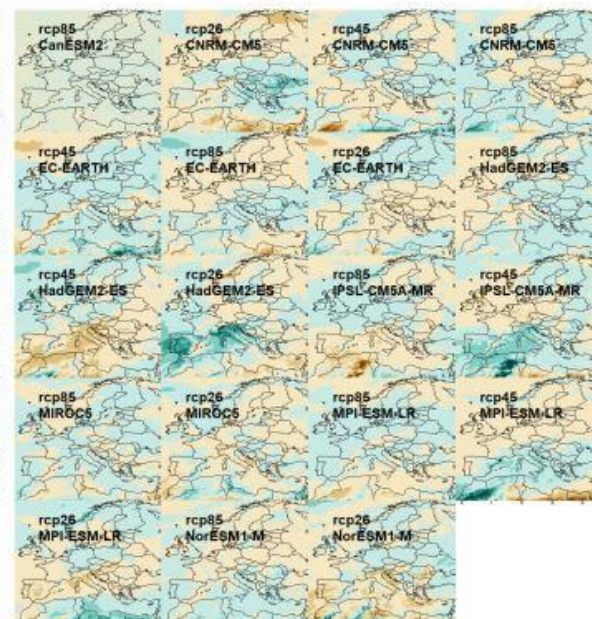

JJA

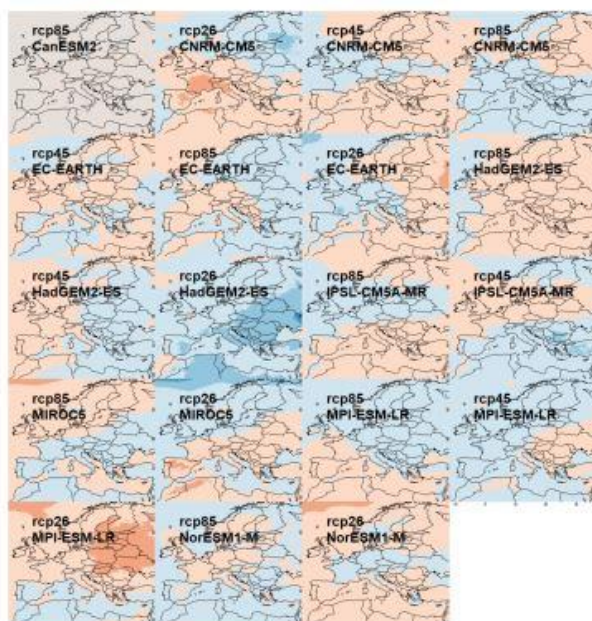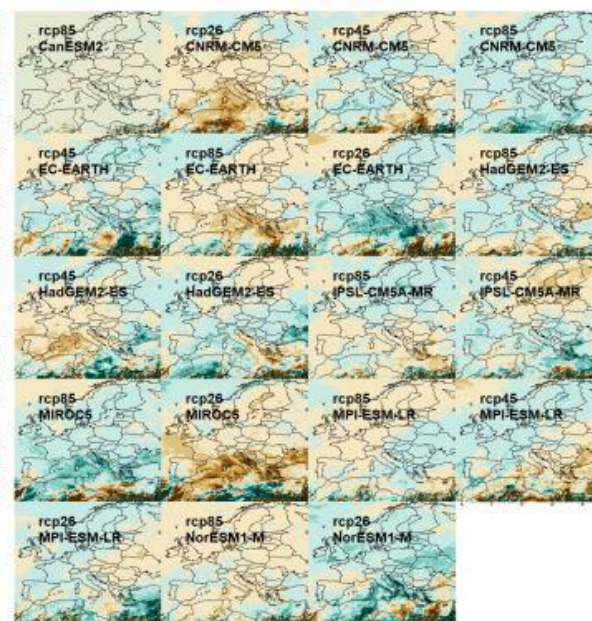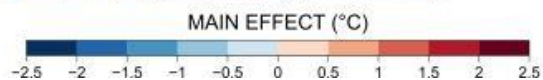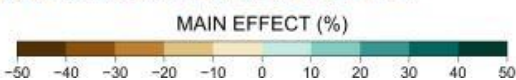

**Figure S4.** Estimated RCP/GCM interaction effects for absolute temperature (left) and relative precipitation changes (right) in winter (DJF) and summer (JJA), at the end of the twenty-first century (2071-2099) compared to the period 1981-2010.

#### 4 Main results for the countries of the domain

**Table S2.** Mean expected change response  $BM_k$ , scenario-excluded uncertainty  $BU$  and partition of the total uncertainty for the countries of the domain, for absolute changes of mean temperature in winter (DJF) in the near future (2021-2050) compared to the period 1981-2010. I1, I2 and I3 refer to interactions RCM/GCM, RCP/RCM and RCP/GCM, respectively. IV and RV refer to internal and residual variability, respectively. Absolute mean expected changes greater than the uncertainty ( $|BU/BM| > 1$ ) are indicated in bold font.

| Country       | $BM_k$ and $BU$ ( $^{\circ}\text{C}$ ) |            |            |      | % Total variance |     |    |        |    |   |    |    |
|---------------|----------------------------------------|------------|------------|------|------------------|-----|----|--------|----|---|----|----|
|               | RCP                                    |            |            | $BU$ | Main effects     |     |    | Inter. |    |   | IV | RV |
| 2.6           | 4.5                                    | 8.5        | RCM        |      | GCM              | RCP | I1 | I2     | I3 |   |    |    |
| Algeria       | <b>0.8</b>                             | <b>1.0</b> | <b>1.3</b> | 0.3  | 21               | 24  | 39 | 2      | 1  | 4 | 7  | 2  |
| Albania       | <b>0.8</b>                             | <b>1.1</b> | <b>1.3</b> | 0.4  | 13               | 47  | 21 | 1      | 1  | 6 | 9  | 2  |
| Bosnia and H. | <b>0.9</b>                             | <b>1.2</b> | <b>1.4</b> | 0.4  | 16               | 37  | 21 | 3      | 1  | 7 | 11 | 3  |
| Bulgaria      | <b>0.8</b>                             | <b>1.1</b> | <b>1.4</b> | 0.4  | 15               | 35  | 21 | 2      | 1  | 9 | 13 | 3  |
| Cyprus        | <b>0.8</b>                             | <b>0.9</b> | <b>1.2</b> | 0.3  | 3                | 52  | 27 | 1      | 1  | 6 | 8  | 1  |
| Denmark       | <b>0.6</b>                             | <b>0.9</b> | <b>1.1</b> | 0.3  | 4                | 44  | 29 | 5      | 1  | 4 | 12 | 1  |
| Ireland       | <b>0.4</b>                             | <b>0.6</b> | <b>0.8</b> | 0.3  | 8                | 50  | 27 | 2      | 0  | 2 | 10 | 1  |
| Estonia       | <b>1.1</b>                             | <b>1.3</b> | <b>1.7</b> | 0.6  | 13               | 42  | 15 | 8      | 1  | 4 | 14 | 3  |
| Austria       | <b>0.8</b>                             | <b>1.1</b> | <b>1.4</b> | 0.4  | 13               | 40  | 24 | 5      | 1  | 5 | 9  | 3  |
| Czech Rep.    | <b>0.8</b>                             | <b>1.1</b> | <b>1.4</b> | 0.4  | 11               | 35  | 25 | 7      | 1  | 6 | 12 | 3  |
| Finland       | <b>1.5</b>                             | <b>1.9</b> | <b>2.4</b> | 0.7  | 14               | 47  | 18 | 8      | 0  | 3 | 8  | 2  |
| France        | <b>0.6</b>                             | <b>0.9</b> | <b>1.1</b> | 0.3  | 7                | 42  | 30 | 4      | 0  | 5 | 10 | 2  |
| Germany       | <b>0.7</b>                             | <b>1.0</b> | <b>1.2</b> | 0.4  | 4                | 42  | 26 | 7      | 1  | 6 | 11 | 3  |
| Greece        | <b>0.8</b>                             | <b>1.0</b> | <b>1.2</b> | 0.3  | 8                | 50  | 22 | 1      | 1  | 7 | 10 | 2  |
| Croatia       | <b>0.8</b>                             | <b>1.1</b> | <b>1.4</b> | 0.4  | 13               | 38  | 22 | 5      | 1  | 7 | 12 | 3  |
| Hungary       | <b>0.9</b>                             | <b>1.2</b> | <b>1.4</b> | 0.4  | 19               | 30  | 22 | 5      | 1  | 6 | 13 | 3  |
| Israel        | <b>0.9</b>                             | <b>1.0</b> | <b>1.2</b> | 0.3  | 7                | 55  | 23 | 1      | 1  | 4 | 8  | 1  |
| Italy         | <b>0.8</b>                             | <b>1.0</b> | <b>1.3</b> | 0.3  | 11               | 47  | 27 | 2      | 1  | 4 | 7  | 2  |
| Jordan        | <b>0.9</b>                             | <b>1.0</b> | <b>1.3</b> | 0.3  | 10               | 54  | 22 | 1      | 1  | 4 | 7  | 1  |
| Lebanon       | <b>1.0</b>                             | <b>1.1</b> | <b>1.4</b> | 0.4  | 8                | 55  | 20 | 1      | 1  | 5 | 9  | 1  |
| Latvia        | <b>1.0</b>                             | <b>1.3</b> | <b>1.6</b> | 0.5  | 10               | 37  | 18 | 8      | 1  | 5 | 17 | 3  |
| Belarus       | <b>1.0</b>                             | <b>1.3</b> | <b>1.6</b> | 0.5  | 10               | 35  | 19 | 8      | 1  | 5 | 18 | 3  |
| Lithuania     | <b>0.9</b>                             | <b>1.2</b> | <b>1.5</b> | 0.5  | 9                | 40  | 17 | 8      | 2  | 5 | 16 | 3  |
| Slovakia      | <b>0.9</b>                             | <b>1.2</b> | <b>1.5</b> | 0.4  | 19               | 29  | 25 | 6      | 1  | 6 | 12 | 3  |
| Macedonia     | <b>0.8</b>                             | <b>1.1</b> | <b>1.4</b> | 0.4  | 17               | 37  | 22 | 2      | 0  | 8 | 11 | 3  |
| Morocco       | <b>0.8</b>                             | <b>1.0</b> | <b>1.4</b> | 0.3  | 10               | 34  | 43 | 1      | 1  | 4 | 7  | 2  |
| Netherlands   | <b>0.6</b>                             | <b>0.8</b> | <b>1.1</b> | 0.3  | 5                | 41  | 26 | 6      | 1  | 7 | 12 | 3  |
| Norway        | <b>1.0</b>                             | <b>1.3</b> | <b>1.7</b> | 0.5  | 10               | 44  | 28 | 3      | 1  | 4 | 9  | 1  |
| Poland        | <b>0.8</b>                             | <b>1.1</b> | <b>1.4</b> | 0.4  | 7                | 38  | 22 | 8      | 2  | 6 | 14 | 3  |
| Portugal      | <b>0.6</b>                             | <b>0.8</b> | <b>1.0</b> | 0.2  | 4                | 47  | 33 | 2      | 1  | 3 | 8  | 1  |
| Romania       | <b>0.9</b>                             | <b>1.2</b> | <b>1.5</b> | 0.4  | 20               | 28  | 23 | 3      | 1  | 7 | 14 | 4  |
| Moldova       | <b>1.0</b>                             | <b>1.3</b> | <b>1.5</b> | 0.4  | 19               | 25  | 22 | 5      | 2  | 6 | 18 | 4  |
| Slovenia      | <b>0.8</b>                             | <b>1.1</b> | <b>1.4</b> | 0.4  | 12               | 37  | 24 | 6      | 1  | 6 | 11 | 3  |
| Spain         | <b>0.7</b>                             | <b>0.9</b> | <b>1.1</b> | 0.2  | 6                | 47  | 34 | 2      | 1  | 2 | 7  | 1  |
| Sweden        | <b>1.1</b>                             | <b>1.4</b> | <b>1.8</b> | 0.5  | 12               | 45  | 24 | 5      | 1  | 4 | 8  | 2  |
| Switzerland   | <b>0.8</b>                             | <b>1.1</b> | <b>1.3</b> | 0.4  | 13               | 43  | 25 | 4      | 1  | 4 | 8  | 2  |
| Tunisia       | <b>0.8</b>                             | <b>1.0</b> | <b>1.2</b> | 0.3  | 12               | 42  | 31 | 2      | 1  | 4 | 8  | 1  |
| Turkey        | <b>1.0</b>                             | <b>1.2</b> | <b>1.4</b> | 0.4  | 14               | 50  | 18 | 1      | 1  | 5 | 9  | 1  |
| UK            | <b>0.5</b>                             | <b>0.7</b> | <b>0.9</b> | 0.3  | 7                | 45  | 31 | 4      | 0  | 3 | 9  | 1  |
| Ukraine       | <b>1.0</b>                             | <b>1.3</b> | <b>1.5</b> | 0.4  | 13               | 35  | 18 | 4      | 1  | 6 | 19 | 3  |

**Table S3.** Absolute changes of mean temperature in winter (DJF) at the end of the century (2071-2099) compared to the period 1981-2010 (see legend of Table S2 for further details).

| Country       | <i>BM<sub>k</sub></i> and <i>BU</i> (°C) |            |            |           | % Total variance |     |     |        |    |    |    |    |
|---------------|------------------------------------------|------------|------------|-----------|------------------|-----|-----|--------|----|----|----|----|
|               | RCP                                      |            |            | <i>BU</i> | Main effects     |     |     | Inter. |    |    |    |    |
|               | 2.6                                      | 4.5        | 8.5        |           | RCM              | GCM | RCP | I1     | I2 | I3 | IV | RV |
| Algeria       | <b>1.2</b>                               | <b>1.8</b> | <b>3.5</b> | 0.6       | 6                | 15  | 75  | 1      | 1  | 1  | 1  | 1  |
| Albania       | <b>1.3</b>                               | <b>2.0</b> | <b>3.4</b> | 0.8       | 5                | 33  | 57  | 1      | 1  | 1  | 1  | 1  |
| Bosnia and H. | <b>1.4</b>                               | <b>2.2</b> | <b>3.7</b> | 0.8       | 5                | 31  | 56  | 1      | 1  | 2  | 2  | 1  |
| Bulgaria      | <b>1.4</b>                               | <b>2.1</b> | <b>3.7</b> | 0.8       | 6                | 26  | 60  | 1      | 1  | 3  | 2  | 1  |
| Cyprus        | <b>1.2</b>                               | <b>1.8</b> | <b>3.3</b> | 0.6       | 1                | 29  | 67  | 0      | 0  | 1  | 1  | 0  |
| Denmark       | <b>0.7</b>                               | <b>1.8</b> | <b>3.1</b> | 0.7       | 2                | 22  | 68  | 2      | 0  | 4  | 1  | 1  |
| Ireland       | 0.4                                      | <b>1.2</b> | <b>2.2</b> | 0.5       | 3                | 17  | 70  | 2      | 1  | 5  | 1  | 1  |
| Estonia       | 1.2                                      | <b>2.7</b> | <b>4.5</b> | 1.3       | 7                | 31  | 52  | 2      | 1  | 4  | 2  | 2  |
| Austria       | <b>1.1</b>                               | <b>2.1</b> | <b>3.6</b> | 0.8       | 5                | 22  | 65  | 2      | 1  | 2  | 1  | 1  |
| Czech Rep.    | <b>1.1</b>                               | <b>2.1</b> | <b>3.7</b> | 0.8       | 6                | 21  | 64  | 2      | 1  | 3  | 1  | 2  |
| Finland       | <b>1.9</b>                               | <b>3.6</b> | <b>5.7</b> | 1.6       | 8                | 38  | 47  | 2      | 0  | 2  | 1  | 1  |
| France        | <b>0.8</b>                               | <b>1.6</b> | <b>2.9</b> | 0.5       | 3                | 16  | 73  | 1      | 1  | 4  | 1  | 1  |
| Germany       | <b>0.9</b>                               | <b>1.9</b> | <b>3.3</b> | 0.7       | 3                | 22  | 66  | 2      | 1  | 4  | 1  | 1  |
| Greece        | <b>1.3</b>                               | <b>1.9</b> | <b>3.3</b> | 0.7       | 3                | 33  | 60  | 0      | 1  | 2  | 1  | 1  |
| Croatia       | <b>1.3</b>                               | <b>2.1</b> | <b>3.6</b> | 0.8       | 5                | 27  | 60  | 1      | 1  | 3  | 2  | 1  |
| Hungary       | <b>1.3</b>                               | <b>2.2</b> | <b>3.7</b> | 0.8       | 8                | 24  | 59  | 2      | 1  | 3  | 2  | 2  |
| Israel        | <b>1.4</b>                               | <b>1.9</b> | <b>3.5</b> | 0.7       | 3                | 31  | 63  | 0      | 0  | 1  | 1  | 1  |
| Italy         | <b>1.1</b>                               | <b>2.0</b> | <b>3.4</b> | 0.6       | 3                | 25  | 67  | 1      | 1  | 1  | 1  | 1  |
| Jordan        | <b>1.5</b>                               | <b>2.0</b> | <b>3.8</b> | 0.7       | 4                | 29  | 64  | 0      | 0  | 1  | 1  | 1  |
| Lebanon       | <b>1.5</b>                               | <b>2.2</b> | <b>3.8</b> | 0.8       | 3                | 34  | 59  | 0      | 0  | 1  | 1  | 1  |
| Latvia        | 1.1                                      | <b>2.5</b> | <b>4.4</b> | 1.2       | 6                | 29  | 54  | 2      | 1  | 5  | 2  | 2  |
| Belarus       | <b>1.2</b>                               | <b>2.5</b> | <b>4.5</b> | 1.2       | 8                | 25  | 57  | 2      | 1  | 4  | 2  | 2  |
| Lithuania     | 1.1                                      | <b>2.4</b> | <b>4.3</b> | 1.2       | 6                | 28  | 55  | 2      | 1  | 5  | 2  | 2  |
| Slovakia      | <b>1.2</b>                               | <b>2.2</b> | <b>3.8</b> | 0.9       | 8                | 23  | 61  | 2      | 1  | 2  | 1  | 2  |
| Macedonia     | <b>1.4</b>                               | <b>2.1</b> | <b>3.6</b> | 0.8       | 7                | 28  | 59  | 1      | 1  | 2  | 1  | 1  |
| Morocco       | <b>1.1</b>                               | <b>1.9</b> | <b>3.6</b> | 0.5       | 4                | 11  | 81  | 0      | 0  | 2  | 1  | 1  |
| Netherlands   | <b>0.7</b>                               | <b>1.6</b> | <b>2.9</b> | 0.6       | 3                | 17  | 70  | 2      | 1  | 4  | 1  | 1  |
| Norway        | <b>1.2</b>                               | <b>2.6</b> | <b>4.3</b> | 1.0       | 6                | 29  | 60  | 1      | 0  | 2  | 1  | 1  |
| Poland        | <b>1.0</b>                               | <b>2.1</b> | <b>3.8</b> | 1.0       | 5                | 26  | 59  | 2      | 1  | 4  | 2  | 2  |
| Portugal      | <b>0.7</b>                               | <b>1.4</b> | <b>2.6</b> | 0.4       | 2                | 14  | 79  | 1      | 0  | 2  | 1  | 1  |
| Romania       | <b>1.4</b>                               | <b>2.2</b> | <b>3.9</b> | 0.8       | 9                | 22  | 61  | 1      | 1  | 3  | 2  | 1  |
| Moldova       | <b>1.5</b>                               | <b>2.4</b> | <b>4.2</b> | 0.9       | 11               | 19  | 59  | 2      | 1  | 4  | 2  | 2  |
| Slovenia      | <b>1.1</b>                               | <b>2.1</b> | <b>3.6</b> | 0.8       | 5                | 22  | 64  | 2      | 1  | 3  | 1  | 1  |
| Spain         | <b>0.8</b>                               | <b>1.6</b> | <b>2.9</b> | 0.4       | 3                | 13  | 80  | 1      | 0  | 2  | 1  | 1  |
| Sweden        | <b>1.3</b>                               | <b>2.7</b> | <b>4.6</b> | 1.2       | 6                | 33  | 55  | 2      | 0  | 2  | 1  | 1  |
| Switzerland   | <b>1.0</b>                               | <b>2.1</b> | <b>3.5</b> | 0.7       | 6                | 19  | 68  | 2      | 1  | 3  | 1  | 1  |
| Tunisia       | <b>1.2</b>                               | <b>1.8</b> | <b>3.3</b> | 0.6       | 4                | 23  | 69  | 1      | 0  | 1  | 1  | 1  |
| Turkey        | <b>1.6</b>                               | <b>2.2</b> | <b>4.0</b> | 0.8       | 7                | 27  | 61  | 1      | 1  | 1  | 1  | 1  |
| UK            | 0.5                                      | <b>1.4</b> | <b>2.4</b> | 0.5       | 3                | 17  | 71  | 2      | 1  | 4  | 1  | 1  |
| Ukraine       | <b>1.5</b>                               | <b>2.4</b> | <b>4.3</b> | 0.9       | 9                | 17  | 62  | 2      | 1  | 5  | 2  | 1  |

**Table S4.** Relative changes of total precipitation in winter (DJF) in the near future (2021-2050) compared to the period 1981-2010 (see legend of Table S2 for further details).

| Country       | $BM_k$ and $BU$ (%) |            |            |      | % Total variance |     |     |        |    |    |    |    |
|---------------|---------------------|------------|------------|------|------------------|-----|-----|--------|----|----|----|----|
|               | RCP                 |            |            | $BU$ | Main effects     |     |     | Inter. |    |    |    |    |
|               | 2.6                 | 4.5        | 8.5        |      | RCM              | GCM | RCP | I1     | I2 | I3 | IV | RV |
| Algeria       | -6                  | <b>-8</b>  | <b>-14</b> | 6    | 10               | 25  | 23  | 2      | 1  | 3  | 34 | 2  |
| Albania       | 4                   | 1          | 1          | 5    | 10               | 28  | 7   | 6      | 1  | 7  | 38 | 4  |
| Bosnia and H. | 4                   | 4          | 3          | 5    | 20               | 23  | 1   | 5      | 1  | 7  | 40 | 3  |
| Bulgaria      | 3                   | 1          | 3          | 5    | 16               | 22  | 2   | 8      | 1  | 8  | 38 | 5  |
| Cyprus        | -4                  | -6         | <b>-9</b>  | 7    | 12               | 38  | 10  | 5      | 1  | 5  | 25 | 4  |
| Denmark       | 2                   | <b>5</b>   | <b>7</b>   | 5    | 28               | 18  | 15  | 4      | 1  | 3  | 28 | 3  |
| Ireland       | 1                   | 2          | <b>5</b>   | 4    | 36               | 16  | 11  | 4      | 2  | 9  | 19 | 3  |
| Estonia       | 1                   | 3          | <b>6</b>   | 5    | 30               | 20  | 13  | 4      | 2  | 3  | 24 | 3  |
| Austria       | 3                   | 3          | <b>6</b>   | 5    | 17               | 43  | 5   | 3      | 1  | 3  | 24 | 4  |
| Czech Rep.    | 3                   | 5          | <b>8</b>   | 6    | 27               | 33  | 13  | 2      | 1  | 3  | 19 | 2  |
| Finland       | 3                   | 4          | <b>7</b>   | 5    | 26               | 24  | 12  | 5      | 1  | 4  | 25 | 2  |
| France        | 3                   | <b>4</b>   | <b>5</b>   | 3    | 14               | 17  | 2   | 2      | 1  | 4  | 58 | 2  |
| Germany       | 2                   | 4          | <b>7</b>   | 5    | 18               | 28  | 13  | 2      | 1  | 6  | 30 | 2  |
| Greece        | 1                   | -2         | -2         | 5    | 11               | 38  | 7   | 2      | 1  | 4  | 35 | 3  |
| Croatia       | <b>6</b>            | <b>5</b>   | <b>5</b>   | 5    | 10               | 18  | 1   | 7      | 1  | 13 | 47 | 4  |
| Hungary       | 5                   | <b>7</b>   | <b>8</b>   | 6    | 12               | 33  | 4   | 8      | 1  | 5  | 33 | 4  |
| Israel        | -5                  | -5         | <b>-7</b>  | 7    | 21               | 28  | 2   | 5      | 1  | 9  | 31 | 3  |
| Italy         | <b>5</b>            | 2          | 1          | 5    | 6                | 17  | 12  | 6      | 1  | 10 | 44 | 4  |
| Jordan        | -6                  | -7         | <b>-10</b> | 8    | 13               | 22  | 6   | 6      | 2  | 10 | 38 | 4  |
| Lebanon       | -4                  | -6         | <b>-8</b>  | 7    | 14               | 36  | 4   | 4      | 1  | 7  | 32 | 3  |
| Latvia        | 2                   | 3          | <b>6</b>   | 5    | 25               | 22  | 14  | 3      | 2  | 3  | 27 | 3  |
| Belarus       | 3                   | 4          | <b>7</b>   | 4    | 18               | 30  | 18  | 2      | 0  | 2  | 28 | 2  |
| Lithuania     | 2                   | 4          | <b>7</b>   | 4    | 22               | 20  | 18  | 3      | 2  | 2  | 30 | 4  |
| Slovakia      | 5                   | <b>6</b>   | <b>8</b>   | 5    | 16               | 28  | 6   | 5      | 1  | 3  | 37 | 3  |
| Macedonia     | 3                   | 1          | 2          | 5    | 19               | 25  | 2   | 6      | 1  | 5  | 39 | 4  |
| Morocco       | -4                  | <b>-11</b> | <b>-18</b> | 8    | 17               | 13  | 33  | 2      | 0  | 5  | 30 | 1  |
| Netherlands   | 3                   | 4          | <b>7</b>   | 5    | 25               | 18  | 13  | 3      | 1  | 4  | 33 | 2  |
| Norway        | 0                   | 1          | 4          | 5    | 29               | 27  | 9   | 3      | 1  | 4  | 24 | 2  |
| Poland        | 2                   | 4          | <b>8</b>   | 5    | 20               | 37  | 18  | 1      | 1  | 2  | 20 | 2  |
| Portugal      | 2                   | 0          | -4         | 6    | 8                | 23  | 14  | 3      | 1  | 7  | 42 | 2  |
| Romania       | 4                   | 5          | <b>6</b>   | 5    | 24               | 29  | 3   | 3      | 1  | 7  | 27 | 5  |
| Moldova       | 4                   | 3          | 7          | 7    | 13               | 28  | 5   | 3      | 3  | 6  | 35 | 6  |
| Slovenia      | <b>7</b>            | 5          | <b>6</b>   | 6    | 12               | 16  | 3   | 5      | 1  | 12 | 48 | 4  |
| Spain         | 1                   | -1         | -4         | 5    | 12               | 15  | 17  | 3      | 1  | 9  | 41 | 2  |
| Sweden        | 2                   | <b>4</b>   | <b>7</b>   | 4    | 26               | 16  | 25  | 4      | 1  | 2  | 23 | 3  |
| Switzerland   | 4                   | <b>5</b>   | <b>6</b>   | 5    | 9                | 28  | 3   | 4      | 1  | 7  | 44 | 3  |
| Tunisia       | -5                  | -8         | <b>-9</b>  | 8    | 14               | 41  | 6   | 3      | 2  | 2  | 30 | 4  |
| Turkey        | 0                   | -2         | -1         | 5    | 8                | 54  | 2   | 3      | 0  | 4  | 26 | 3  |
| UK            | 1                   | 3          | <b>5</b>   | 4    | 38               | 11  | 14  | 4      | 2  | 7  | 21 | 2  |
| Ukraine       | 3                   | 4          | <b>6</b>   | 5    | 9                | 42  | 7   | 4      | 1  | 6  | 29 | 3  |

**Table S5.** Relative changes of total precipitation in winter (DJF) at the end of the century (2071-2099) compared to the period 1981-2010 (see legend of Table S2 for further details).

| Country       | <i>BM<sub>k</sub></i> and <i>BU</i> (%) |            |            |           | % Total variance |     |     |        |    |    |    |    |
|---------------|-----------------------------------------|------------|------------|-----------|------------------|-----|-----|--------|----|----|----|----|
|               | RCP                                     |            |            | <i>BU</i> | Main effects     |     |     | Inter. |    |    |    |    |
|               | 2.6                                     | 4.5        | 8.5        |           | RCM              | GCM | RCP | I1     | I2 | I3 | IV | RV |
| Algeria       | -8                                      | <b>-17</b> | <b>-31</b> | 11        | 10               | 21  | 46  | 3      | 3  | 8  | 8  | 2  |
| Albania       | 7                                       | 0          | 1          | 9         | 18               | 26  | 9   | 11     | 1  | 16 | 12 | 7  |
| Bosnia and H. | <b>9</b>                                | 7          | <b>9</b>   | 9         | 27               | 21  | 2   | 10     | 1  | 20 | 12 | 7  |
| Bulgaria      | 6                                       | 1          | 8          | 11        | 20               | 33  | 6   | 12     | 2  | 11 | 10 | 7  |
| Cyprus        | -9                                      | <b>-15</b> | <b>-24</b> | 14        | 14               | 51  | 17  | 4      | 2  | 4  | 5  | 4  |
| Denmark       | 2                                       | <b>10</b>  | <b>18</b>  | 10        | 35               | 16  | 29  | 4      | 2  | 6  | 5  | 3  |
| Ireland       | 1                                       | 6          | <b>12</b>  | 9         | 34               | 23  | 21  | 3      | 2  | 11 | 4  | 3  |
| Estonia       | 1                                       | 7          | <b>17</b>  | 10        | 31               | 17  | 31  | 3      | 2  | 7  | 5  | 4  |
| Austria       | 5                                       | 7          | <b>13</b>  | 9         | 17               | 50  | 13  | 3      | 2  | 2  | 7  | 6  |
| Czech Rep.    | 3                                       | 9          | <b>18</b>  | 10        | 24               | 34  | 27  | 2      | 1  | 4  | 5  | 3  |
| Finland       | 5                                       | <b>10</b>  | <b>20</b>  | 10        | 24               | 27  | 28  | 4      | 2  | 7  | 5  | 3  |
| France        | <b>6</b>                                | <b>6</b>   | <b>11</b>  | 6         | 26               | 25  | 11  | 4      | 2  | 7  | 19 | 6  |
| Germany       | 3                                       | <b>9</b>   | <b>17</b>  | 8         | 22               | 22  | 36  | 2      | 1  | 8  | 8  | 2  |
| Greece        | 2                                       | -7         | -6         | 10        | 14               | 48  | 13  | 3      | 1  | 8  | 9  | 5  |
| Croatia       | <b>13</b>                               | <b>10</b>  | <b>13</b>  | 10        | 18               | 18  | 3   | 11     | 2  | 27 | 12 | 9  |
| Hungary       | 11                                      | <b>12</b>  | <b>20</b>  | 11        | 16               | 31  | 12  | 11     | 2  | 13 | 8  | 8  |
| Israel        | -12                                     | -10        | <b>-21</b> | 13        | 17               | 48  | 11  | 4      | 2  | 7  | 8  | 3  |
| Italy         | <b>12</b>                               | 2          | 3          | 10        | 12               | 21  | 20  | 8      | 2  | 21 | 10 | 7  |
| Jordan        | -14                                     | -14        | <b>-27</b> | 15        | 12               | 43  | 14  | 6      | 2  | 9  | 10 | 4  |
| Lebanon       | -11                                     | -13        | <b>-22</b> | 14        | 14               | 55  | 11  | 3      | 1  | 5  | 8  | 3  |
| Latvia        | 2                                       | 8          | <b>17</b>  | 9         | 29               | 18  | 33  | 3      | 2  | 7  | 5  | 3  |
| Belarus       | 5                                       | <b>10</b>  | <b>19</b>  | 8         | 23               | 25  | 36  | 2      | 1  | 5  | 6  | 3  |
| Lithuania     | 3                                       | <b>9</b>   | <b>18</b>  | 8         | 26               | 18  | 35  | 2      | 1  | 5  | 6  | 5  |
| Slovakia      | 9                                       | <b>10</b>  | <b>17</b>  | 10        | 18               | 38  | 13  | 6      | 2  | 7  | 9  | 6  |
| Macedonia     | 5                                       | -1         | 4          | 9         | 26               | 26  | 7   | 9      | 1  | 11 | 12 | 9  |
| Morocco       | -3                                      | <b>-24</b> | <b>-41</b> | 14        | 14               | 13  | 56  | 2      | 1  | 6  | 7  | 1  |
| Netherlands   | 4                                       | 8          | <b>19</b>  | 9         | 28               | 18  | 32  | 3      | 1  | 8  | 8  | 2  |
| Norway        | -1                                      | 3          | 10         | 11        | 28               | 35  | 17  | 3      | 1  | 6  | 5  | 3  |
| Poland        | 2                                       | 9          | <b>17</b>  | 9         | 22               | 35  | 31  | 1      | 1  | 3  | 5  | 3  |
| Portugal      | 7                                       | -1         | -13        | 13        | 12               | 30  | 28  | 4      | 2  | 14 | 8  | 3  |
| Romania       | 6                                       | 9          | <b>14</b>  | 10        | 28               | 26  | 10  | 5      | 3  | 12 | 7  | 8  |
| Moldova       | 7                                       | 4          | <b>16</b>  | 12        | 12               | 26  | 14  | 6      | 6  | 16 | 11 | 9  |
| Slovenia      | <b>17</b>                               | 8          | <b>15</b>  | 12        | 15               | 25  | 9   | 8      | 1  | 23 | 12 | 8  |
| Spain         | 6                                       | -4         | <b>-11</b> | 10        | 15               | 24  | 33  | 4      | 1  | 13 | 8  | 3  |
| Sweden        | 3                                       | <b>8</b>   | <b>19</b>  | 8         | 24               | 18  | 44  | 3      | 1  | 4  | 4  | 2  |
| Switzerland   | 6                                       | <b>9</b>   | <b>13</b>  | 8         | 14               | 41  | 13  | 4      | 2  | 6  | 14 | 6  |
| Tunisia       | -9                                      | <b>-15</b> | <b>-23</b> | 14        | 14               | 45  | 14  | 3      | 5  | 5  | 9  | 5  |
| Turkey        | -1                                      | -5         | -5         | 10        | 11               | 69  | 3   | 3      | 0  | 3  | 6  | 5  |
| UK            | 2                                       | 7          | <b>13</b>  | 8         | 39               | 18  | 21  | 3      | 2  | 9  | 5  | 2  |
| Ukraine       | 5                                       | 7          | <b>15</b>  | 9         | 13               | 42  | 18  | 5      | 1  | 9  | 8  | 5  |

**Table S6.** Absolute changes of mean temperature in summer (JJA) in the near future (2021-2050) compared to the period 1981-2010 (see legend of Table S2 for further details).

| Country       | <i>BM<sub>k</sub></i> and <i>BU</i> (°C) |            |            |           | % Total variance |     |     |        |    |    |    |    |
|---------------|------------------------------------------|------------|------------|-----------|------------------|-----|-----|--------|----|----|----|----|
|               | RCP                                      |            |            | <i>BU</i> | Main effects     |     |     | Inter. |    |    |    |    |
|               | 2.6                                      | 4.5        | 8.5        |           | RCM              | GCM | RCP | I1     | I2 | I3 | IV | RV |
| Algeria       | <b>1.2</b>                               | <b>1.5</b> | <b>1.9</b> | 0.4       | 5                | 50  | 38  | 2      | 0  | 2  | 3  | 1  |
| Albania       | <b>1.2</b>                               | <b>1.6</b> | <b>1.9</b> | 0.5       | 16               | 52  | 22  | 3      | 1  | 2  | 4  | 1  |
| Bosnia and H. | <b>1.1</b>                               | <b>1.5</b> | <b>1.8</b> | 0.6       | 24               | 51  | 15  | 3      | 1  | 1  | 4  | 1  |
| Bulgaria      | <b>1.2</b>                               | <b>1.5</b> | <b>1.9</b> | 0.6       | 20               | 54  | 18  | 3      | 0  | 1  | 3  | 1  |
| Cyprus        | <b>1.1</b>                               | <b>1.3</b> | <b>1.7</b> | 0.4       | 3                | 57  | 34  | 1      | 1  | 1  | 3  | 0  |
| Denmark       | <b>0.8</b>                               | <b>0.9</b> | <b>1.1</b> | 0.4       | 14               | 62  | 13  | 2      | 0  | 2  | 6  | 1  |
| Ireland       | <b>0.6</b>                               | <b>0.7</b> | <b>0.9</b> | 0.3       | 14               | 59  | 13  | 2      | 1  | 4  | 6  | 1  |
| Estonia       | <b>1.0</b>                               | <b>1.2</b> | <b>1.5</b> | 0.4       | 19               | 54  | 15  | 3      | 0  | 1  | 6  | 1  |
| Austria       | <b>1.0</b>                               | <b>1.3</b> | <b>1.5</b> | 0.5       | 27               | 47  | 13  | 4      | 1  | 1  | 5  | 2  |
| Czech Rep.    | <b>1.0</b>                               | <b>1.2</b> | <b>1.4</b> | 0.6       | 34               | 45  | 9   | 4      | 1  | 1  | 5  | 2  |
| Finland       | <b>1.1</b>                               | <b>1.3</b> | <b>1.6</b> | 0.4       | 13               | 53  | 21  | 2      | 0  | 2  | 7  | 1  |
| France        | <b>0.9</b>                               | <b>1.2</b> | <b>1.4</b> | 0.5       | 26               | 42  | 14  | 6      | 1  | 2  | 6  | 2  |
| Germany       | <b>0.9</b>                               | <b>1.1</b> | <b>1.3</b> | 0.5       | 29               | 47  | 10  | 5      | 1  | 1  | 6  | 2  |
| Greece        | <b>1.2</b>                               | <b>1.5</b> | <b>1.9</b> | 0.5       | 16               | 51  | 25  | 3      | 0  | 1  | 3  | 1  |
| Croatia       | <b>1.1</b>                               | <b>1.5</b> | <b>1.7</b> | 0.6       | 30               | 46  | 12  | 4      | 1  | 1  | 5  | 1  |
| Hungary       | <b>1.1</b>                               | <b>1.4</b> | <b>1.6</b> | 0.6       | 36               | 42  | 10  | 3      | 1  | 1  | 5  | 2  |
| Israel        | <b>1.1</b>                               | <b>1.3</b> | <b>1.7</b> | 0.4       | 4                | 63  | 27  | 1      | 0  | 1  | 3  | 0  |
| Italy         | <b>1.1</b>                               | <b>1.5</b> | <b>1.7</b> | 0.5       | 18               | 52  | 18  | 4      | 1  | 2  | 4  | 1  |
| Jordan        | <b>1.2</b>                               | <b>1.5</b> | <b>1.9</b> | 0.4       | 5                | 58  | 31  | 1      | 0  | 1  | 3  | 0  |
| Lebanon       | <b>1.2</b>                               | <b>1.4</b> | <b>1.9</b> | 0.4       | 5                | 60  | 29  | 1      | 0  | 1  | 3  | 0  |
| Latvia        | <b>1.0</b>                               | <b>1.1</b> | <b>1.4</b> | 0.5       | 24               | 52  | 12  | 4      | 0  | 1  | 6  | 2  |
| Belarus       | <b>1.1</b>                               | <b>1.2</b> | <b>1.5</b> | 0.6       | 35               | 45  | 8   | 4      | 0  | 1  | 4  | 2  |
| Lithuania     | <b>1.0</b>                               | <b>1.1</b> | <b>1.4</b> | 0.5       | 30               | 48  | 9   | 4      | 0  | 1  | 5  | 2  |
| Slovakia      | <b>1.1</b>                               | <b>1.3</b> | <b>1.5</b> | 0.6       | 36               | 44  | 9   | 3      | 1  | 1  | 4  | 2  |
| Macedonia     | <b>1.3</b>                               | <b>1.6</b> | <b>2.0</b> | 0.6       | 18               | 54  | 20  | 2      | 0  | 1  | 3  | 1  |
| Morocco       | <b>1.0</b>                               | <b>1.3</b> | <b>1.6</b> | 0.4       | 5                | 52  | 34  | 1      | 0  | 3  | 5  | 2  |
| Netherlands   | <b>0.8</b>                               | <b>0.9</b> | <b>1.1</b> | 0.4       | 17               | 57  | 10  | 4      | 1  | 2  | 6  | 2  |
| Norway        | <b>1.0</b>                               | <b>1.2</b> | <b>1.5</b> | 0.4       | 13               | 50  | 27  | 1      | 0  | 2  | 6  | 1  |
| Poland        | <b>1.0</b>                               | <b>1.1</b> | <b>1.4</b> | 0.5       | 35               | 45  | 8   | 3      | 0  | 1  | 5  | 2  |
| Portugal      | <b>1.0</b>                               | <b>1.3</b> | <b>1.6</b> | 0.4       | 9                | 46  | 30  | 2      | 1  | 4  | 7  | 2  |
| Romania       | <b>1.1</b>                               | <b>1.4</b> | <b>1.8</b> | 0.6       | 27               | 50  | 14  | 3      | 0  | 1  | 4  | 1  |
| Moldova       | <b>1.1</b>                               | <b>1.4</b> | <b>1.7</b> | 0.6       | 28               | 50  | 12  | 3      | 0  | 1  | 4  | 2  |
| Slovenia      | <b>1.1</b>                               | <b>1.4</b> | <b>1.6</b> | 0.6       | 30               | 46  | 12  | 4      | 1  | 1  | 5  | 2  |
| Spain         | <b>1.0</b>                               | <b>1.4</b> | <b>1.7</b> | 0.4       | 10               | 52  | 27  | 2      | 1  | 2  | 5  | 2  |
| Sweden        | <b>0.9</b>                               | <b>1.2</b> | <b>1.4</b> | 0.4       | 14               | 54  | 22  | 1      | 1  | 2  | 6  | 1  |
| Switzerland   | <b>1.0</b>                               | <b>1.3</b> | <b>1.5</b> | 0.5       | 21               | 48  | 15  | 5      | 1  | 1  | 5  | 2  |
| Tunisia       | <b>1.1</b>                               | <b>1.4</b> | <b>1.7</b> | 0.4       | 7                | 55  | 29  | 3      | 1  | 2  | 4  | 1  |
| Turkey        | <b>1.3</b>                               | <b>1.6</b> | <b>2.0</b> | 0.5       | 11               | 54  | 30  | 1      | 0  | 1  | 3  | 0  |
| UK            | <b>0.7</b>                               | <b>0.8</b> | <b>1.0</b> | 0.4       | 15               | 59  | 14  | 3      | 1  | 3  | 6  | 1  |
| Ukraine       | <b>1.2</b>                               | <b>1.3</b> | <b>1.7</b> | 0.6       | 32               | 47  | 12  | 3      | 0  | 1  | 4  | 2  |



**Table S7.** Absolute changes of mean temperature in summer (JJA) at the end of the century (2071-2099) compared to the period 1981-2010 (see legend of Table S2 for further details).

| Country       | <i>BM<sub>k</sub></i> and <i>BU</i> (°C) |     |     |           | % Total variance |     |     |        |    |    |    |    |
|---------------|------------------------------------------|-----|-----|-----------|------------------|-----|-----|--------|----|----|----|----|
|               | RCP                                      |     |     | <i>BU</i> | Main effects     |     |     | Inter. |    |    |    |    |
|               | 2.6                                      | 4.5 | 8.5 |           | RCP              | GCM | RCP | I1     | I2 | I3 | IV | RV |
| Algeria       | 1.7                                      | 2.9 | 5.4 | 0.8       | 2                | 18  | 77  | 0      | 0  | 1  | 0  | 0  |
| Albania       | 1.6                                      | 3.0 | 5.2 | 1.1       | 11               | 20  | 64  | 2      | 0  | 1  | 0  | 1  |
| Bosnia and H. | 1.6                                      | 2.8 | 4.9 | 1.3       | 18               | 24  | 52  | 2      | 1  | 1  | 0  | 1  |
| Bulgaria      | 1.7                                      | 3.0 | 5.2 | 1.2       | 12               | 25  | 60  | 1      | 0  | 1  | 0  | 1  |
| Cyprus        | 1.4                                      | 2.5 | 4.5 | 0.7       | 1                | 18  | 79  | 0      | 0  | 1  | 0  | 0  |
| Denmark       | 1.1                                      | 1.8 | 3.0 | 0.7       | 9                | 33  | 53  | 1      | 0  | 2  | 1  | 1  |
| Ireland       | 0.7                                      | 1.4 | 2.7 | 0.7       | 6                | 31  | 59  | 1      | 0  | 1  | 1  | 1  |
| Estonia       | 1.5                                      | 2.4 | 3.8 | 1.0       | 18               | 26  | 49  | 1      | 1  | 2  | 1  | 1  |
| Austria       | 1.5                                      | 2.5 | 4.3 | 1.2       | 20               | 23  | 49  | 3      | 1  | 1  | 1  | 2  |
| Czech Rep.    | 1.4                                      | 2.3 | 3.9 | 1.2       | 26               | 25  | 43  | 3      | 1  | 1  | 1  | 2  |
| Finland       | 1.6                                      | 2.6 | 4.1 | 0.9       | 11               | 26  | 58  | 1      | 0  | 2  | 1  | 1  |
| France        | 1.1                                      | 2.2 | 4.1 | 1.0       | 17               | 17  | 58  | 3      | 1  | 2  | 1  | 1  |
| Germany       | 1.2                                      | 2.1 | 3.6 | 1.0       | 22               | 24  | 47  | 3      | 1  | 1  | 1  | 1  |
| Greece        | 1.7                                      | 3.0 | 5.2 | 1.0       | 9                | 19  | 68  | 1      | 0  | 1  | 0  | 1  |
| Croatia       | 1.5                                      | 2.7 | 4.8 | 1.3       | 21               | 22  | 51  | 3      | 1  | 1  | 1  | 1  |
| Hungary       | 1.5                                      | 2.7 | 4.5 | 1.3       | 23               | 22  | 48  | 3      | 1  | 2  | 1  | 2  |
| Israel        | 1.5                                      | 2.6 | 4.5 | 0.8       | 2                | 24  | 71  | 1      | 0  | 1  | 0  | 0  |
| Italy         | 1.4                                      | 2.7 | 4.9 | 1.1       | 12               | 21  | 60  | 2      | 1  | 1  | 0  | 1  |
| Jordan        | 1.6                                      | 2.9 | 5.2 | 0.8       | 3                | 19  | 76  | 0      | 0  | 1  | 0  | 0  |
| Lebanon       | 1.6                                      | 2.8 | 4.9 | 0.8       | 2                | 20  | 75  | 0      | 0  | 1  | 0  | 0  |
| Latvia        | 1.5                                      | 2.3 | 3.8 | 1.0       | 23               | 25  | 45  | 2      | 1  | 2  | 1  | 2  |
| Belarus       | 1.6                                      | 2.5 | 4.1 | 1.2       | 31               | 21  | 40  | 2      | 1  | 2  | 1  | 2  |
| Lithuania     | 1.5                                      | 2.3 | 3.8 | 1.1       | 27               | 24  | 42  | 2      | 1  | 2  | 1  | 2  |
| Slovakia      | 1.5                                      | 2.6 | 4.3 | 1.3       | 27               | 22  | 44  | 2      | 1  | 1  | 1  | 2  |
| Macedonia     | 1.7                                      | 3.1 | 5.4 | 1.2       | 11               | 23  | 62  | 1      | 0  | 1  | 0  | 1  |
| Morocco       | 1.3                                      | 2.6 | 4.6 | 0.6       | 2                | 14  | 82  | 0      | 0  | 1  | 0  | 1  |
| Netherlands   | 1.0                                      | 1.8 | 3.1 | 0.8       | 12               | 28  | 53  | 2      | 1  | 1  | 1  | 1  |
| Norway        | 1.4                                      | 2.4 | 3.9 | 0.7       | 8                | 23  | 65  | 0      | 0  | 1  | 1  | 1  |
| Poland        | 1.4                                      | 2.3 | 3.8 | 1.2       | 28               | 25  | 41  | 2      | 0  | 2  | 1  | 2  |
| Portugal      | 1.1                                      | 2.5 | 4.4 | 0.7       | 5                | 10  | 81  | 1      | 0  | 1  | 1  | 1  |
| Romania       | 1.7                                      | 2.9 | 4.9 | 1.3       | 20               | 23  | 52  | 2      | 1  | 2  | 0  | 1  |
| Moldova       | 1.8                                      | 2.8 | 4.8 | 1.3       | 23               | 23  | 48  | 2      | 1  | 2  | 1  | 1  |
| Slovenia      | 1.5                                      | 2.6 | 4.6 | 1.4       | 23               | 24  | 46  | 3      | 1  | 1  | 1  | 2  |
| Spain         | 1.3                                      | 2.7 | 4.8 | 0.8       | 6                | 15  | 75  | 1      | 0  | 1  | 0  | 1  |
| Sweden        | 1.4                                      | 2.3 | 3.7 | 0.8       | 12               | 24  | 61  | 1      | 0  | 1  | 1  | 1  |
| Switzerland   | 1.4                                      | 2.5 | 4.5 | 1.2       | 16               | 22  | 55  | 3      | 1  | 1  | 1  | 2  |
| Tunisia       | 1.5                                      | 2.7 | 4.9 | 0.8       | 3                | 20  | 73  | 1      | 0  | 1  | 0  | 1  |
| Turkey        | 1.8                                      | 3.1 | 5.4 | 1.0       | 5                | 23  | 70  | 0      | 0  | 1  | 0  | 0  |
| UK            | 0.8                                      | 1.6 | 2.9 | 0.7       | 9                | 27  | 59  | 1      | 0  | 1  | 1  | 1  |
| Ukraine       | 1.8                                      | 2.8 | 4.7 | 1.2       | 24               | 22  | 48  | 1      | 1  | 2  | 1  | 1  |

**Table S8.** Relative changes of total precipitation in summer (JJA) in the near future (2021-2050) compared to the period 1981-2010 (see legend of Table S2 for further details).

| Country       | <i>BM<sub>k</sub></i> and <i>BU</i> (%) |            |            |           | % Total variance |     |     |        |    |    |    |    |
|---------------|-----------------------------------------|------------|------------|-----------|------------------|-----|-----|--------|----|----|----|----|
|               | RCP                                     |            |            | <i>BU</i> | Main effects     |     |     | Inter. |    |    |    |    |
|               | 2.6                                     | 4.5        | 8.5        |           | RCM              | GCM | RCP | I1     | I2 | I3 | IV | RV |
| Algeria       | -5                                      | -10        | -8         | 17        | 17               | 57  | 2   | 3      | 0  | 2  | 15 | 4  |
| Albania       | -4                                      | -10        | <b>-13</b> | 11        | 13               | 39  | 11  | 8      | 2  | 7  | 14 | 5  |
| Bosnia and H. | -3                                      | -7         | -8         | 9         | 17               | 39  | 5   | 10     | 2  | 6  | 16 | 5  |
| Bulgaria      | -3                                      | -8         | <b>-11</b> | 9         | 9                | 39  | 12  | 9      | 1  | 6  | 20 | 6  |
| Cyprus        | -8                                      | -19        | -16        | 21        | 4                | 41  | 5   | 8      | 1  | 3  | 33 | 5  |
| Denmark       | -1                                      | 0          | -1         | 7         | 41               | 24  | 0   | 5      | 1  | 4  | 19 | 5  |
| Ireland       | -4                                      | <b>-5</b>  | <b>-7</b>  | 4         | 25               | 20  | 8   | 5      | 2  | 10 | 27 | 4  |
| Estonia       | -1                                      | 2          | 4          | 7         | 19               | 36  | 6   | 7      | 1  | 4  | 19 | 8  |
| Austria       | 0                                       | -1         | 0          | 6         | 28               | 31  | 1   | 14     | 2  | 2  | 16 | 6  |
| Czech Rep.    | 0                                       | 0          | 1          | 6         | 25               | 28  | 1   | 13     | 1  | 2  | 22 | 8  |
| Finland       | 2                                       | 4          | <b>5</b>   | 5         | 18               | 29  | 9   | 7      | 1  | 5  | 24 | 6  |
| France        | -3                                      | -6         | <b>-8</b>  | 7         | 25               | 34  | 9   | 9      | 2  | 4  | 13 | 4  |
| Germany       | -1                                      | -1         | -1         | 6         | 35               | 27  | 0   | 11     | 1  | 3  | 15 | 8  |
| Greece        | -4                                      | -9         | <b>-14</b> | 11        | 10               | 35  | 13  | 10     | 1  | 8  | 17 | 5  |
| Croatia       | -2                                      | -6         | -6         | 9         | 24               | 31  | 4   | 10     | 2  | 5  | 18 | 5  |
| Hungary       | -1                                      | -4         | -3         | 7         | 21               | 27  | 4   | 9      | 2  | 4  | 27 | 7  |
| Israel        | -12                                     | -22        | -18        | 28        | 7                | 21  | 2   | 16     | 1  | 7  | 39 | 7  |
| Italy         | -0                                      | -5         | -6         | 8         | 19               | 39  | 9   | 9      | 2  | 6  | 12 | 3  |
| Jordan        | -14                                     | -8         | -6         | 37        | 19               | 25  | 1   | 6      | 1  | 3  | 42 | 3  |
| Lebanon       | -8                                      | -18        | -17        | 22        | 8                | 29  | 4   | 9      | 2  | 4  | 38 | 6  |
| Latvia        | -0                                      | 2          | 3          | 7         | 23               | 33  | 3   | 10     | 1  | 4  | 19 | 7  |
| Belarus       | -2                                      | 0          | 0          | 8         | 16               | 43  | 1   | 13     | 1  | 3  | 17 | 6  |
| Lithuania     | -1                                      | 1          | 2          | 8         | 23               | 34  | 2   | 11     | 1  | 3  | 19 | 6  |
| Slovakia      | -1                                      | -3         | -2         | 7         | 17               | 36  | 2   | 11     | 2  | 2  | 23 | 7  |
| Macedonia     | -4                                      | -9         | <b>-12</b> | 9         | 12               | 38  | 12  | 6      | 1  | 7  | 19 | 5  |
| Morocco       | -7                                      | -10        | -12        | 18        | 9                | 73  | 1   | 2      | 0  | 2  | 11 | 1  |
| Netherlands   | -3                                      | -3         | -3         | 7         | 36               | 23  | 0   | 10     | 2  | 3  | 18 | 8  |
| Norway        | 2                                       | 3          | <b>4</b>   | 4         | 35               | 29  | 6   | 3      | 1  | 3  | 19 | 4  |
| Poland        | -0                                      | 0          | 1          | 7         | 29               | 33  | 1   | 11     | 1  | 2  | 16 | 8  |
| Portugal      | -6                                      | <b>-14</b> | <b>-18</b> | 10        | 15               | 29  | 21  | 3      | 2  | 5  | 21 | 3  |
| Romania       | -1                                      | -5         | -6         | 7         | 11               | 37  | 7   | 11     | 2  | 4  | 22 | 7  |
| Moldova       | 0                                       | -3         | -4         | 8         | 17               | 32  | 5   | 8      | 2  | 2  | 29 | 4  |
| Slovenia      | -2                                      | -5         | -5         | 8         | 26               | 30  | 4   | 9      | 2  | 3  | 20 | 6  |
| Spain         | -3                                      | -9         | <b>-12</b> | 9         | 14               | 51  | 15  | 2      | 1  | 3  | 12 | 3  |
| Sweden        | 2                                       | 4          | 5          | 5         | 21               | 42  | 5   | 5      | 1  | 5  | 16 | 4  |
| Switzerland   | -1                                      | -2         | -3         | 7         | 26               | 37  | 2   | 14     | 2  | 3  | 11 | 4  |
| Tunisia       | -5                                      | -13        | -15        | 17        | 13               | 44  | 6   | 10     | 1  | 5  | 17 | 4  |
| Turkey        | -5                                      | <b>-12</b> | <b>-14</b> | 9         | 14               | 39  | 14  | 6      | 1  | 3  | 20 | 3  |
| UK            | -2                                      | -3         | <b>-5</b>  | 5         | 37               | 19  | 4   | 9      | 1  | 7  | 20 | 4  |
| Ukraine       | -2                                      | -4         | -4         | 8         | 15               | 47  | 2   | 9      | 1  | 3  | 19 | 4  |

**Table S9.** Relative changes of total precipitation in summer (JJA) at the end of the century (2071-2099) compared to the period 1981-2010 (see legend of Table S2 for further details).

| Country       | <i>BM<sub>k</sub></i> and <i>BU</i> (%) |            |            |           | % Total variance |     |     |        |    |    |    |    |
|---------------|-----------------------------------------|------------|------------|-----------|------------------|-----|-----|--------|----|----|----|----|
|               | RCP                                     |            |            | <i>BU</i> | Main effects     |     |     | Inter. |    |    |    |    |
|               | 2.6                                     | 4.5        | 8.5        |           | RCM              | GCM | RCP | I1     | I2 | I3 | IV | RV |
| Algeria       | -14                                     | -20        | -22        | 33        | 14               | 68  | 1   | 4      | 1  | 4  | 4  | 5  |
| Albania       | -4                                      | -18        | <b>-30</b> | 20        | 18               | 23  | 23  | 11     | 3  | 9  | 4  | 8  |
| Bosnia and H. | -3                                      | -13        | <b>-20</b> | 17        | 22               | 32  | 13  | 10     | 2  | 8  | 4  | 8  |
| Bulgaria      | -4                                      | -16        | <b>-26</b> | 16        | 12               | 38  | 23  | 8      | 1  | 6  | 5  | 8  |
| Cyprus        | -14                                     | -31        | <b>-39</b> | 38        | 4                | 42  | 7   | 11     | 5  | 7  | 10 | 14 |
| Denmark       | -3                                      | 0          | -4         | 15        | 46               | 30  | 1   | 5      | 2  | 5  | 4  | 7  |
| Ireland       | -7                                      | <b>-11</b> | <b>-18</b> | 9         | 24               | 21  | 20  | 7      | 3  | 14 | 6  | 5  |
| Estonia       | -2                                      | 4          | 8          | 15        | 24               | 40  | 6   | 8      | 1  | 6  | 4  | 11 |
| Austria       | 2                                       | -1         | -2         | 13        | 29               | 39  | 1   | 13     | 3  | 3  | 3  | 7  |
| Czech Rep.    | 1                                       | 0          | 0          | 14        | 25               | 41  | 0   | 13     | 2  | 4  | 5  | 9  |
| Finland       | 2                                       | 7          | <b>12</b>  | 11        | 23               | 31  | 11  | 8      | 2  | 11 | 5  | 9  |
| France        | -5                                      | -14        | <b>-23</b> | 15        | 27               | 35  | 18  | 7      | 2  | 5  | 2  | 4  |
| Germany       | -2                                      | -3         | -5         | 15        | 38               | 37  | 1   | 9      | 2  | 4  | 3  | 8  |
| Greece        | -6                                      | -18        | <b>-34</b> | 19        | 11               | 29  | 27  | 9      | 2  | 10 | 5  | 7  |
| Croatia       | -1                                      | -9         | -16        | 17        | 32               | 26  | 11  | 10     | 2  | 8  | 4  | 7  |
| Hungary       | 1                                       | -7         | -8         | 15        | 24               | 28  | 8   | 13     | 2  | 9  | 6  | 10 |
| Israel        | -14                                     | -19        | -37        | 41        | 5                | 30  | 5   | 19     | 2  | 13 | 17 | 9  |
| Italy         | 2                                       | -10        | -17        | 17        | 25               | 33  | 16  | 10     | 2  | 7  | 3  | 5  |
| Jordan        | -21                                     | 10         | -3         | 71        | 26               | 38  | 3   | 11     | 2  | 3  | 11 | 6  |
| Lebanon       | -22                                     | -25        | <b>-43</b> | 36        | 8                | 39  | 6   | 13     | 5  | 8  | 14 | 8  |
| Latvia        | -2                                      | 3          | 5          | 16        | 28               | 42  | 3   | 9      | 1  | 5  | 4  | 7  |
| Belarus       | -4                                      | -3         | -2         | 18        | 24               | 49  | 0   | 11     | 1  | 4  | 4  | 6  |
| Lithuania     | -2                                      | 2          | 3          | 17        | 31               | 43  | 2   | 9      | 1  | 4  | 4  | 6  |
| Slovakia      | 0                                       | -5         | -7         | 15        | 19               | 41  | 4   | 14     | 2  | 6  | 5  | 9  |
| Macedonia     | -7                                      | <b>-18</b> | <b>-29</b> | 16        | 13               | 33  | 24  | 6      | 2  | 9  | 5  | 8  |
| Morocco       | -13                                     | -23        | -30        | 33        | 11               | 74  | 4   | 2      | 0  | 4  | 3  | 2  |
| Netherlands   | -3                                      | -5         | -9         | 16        | 42               | 29  | 2   | 7      | 2  | 4  | 4  | 10 |
| Norway        | 2                                       | 6          | <b>9</b>   | 9         | 40               | 29  | 11  | 3      | 2  | 4  | 3  | 6  |
| Poland        | 0                                       | -1         | 1          | 16        | 35               | 39  | 0   | 12     | 1  | 3  | 3  | 8  |
| Portugal      | -11                                     | <b>-31</b> | <b>-46</b> | 17        | 13               | 31  | 42  | 1      | 2  | 2  | 5  | 4  |
| Romania       | -2                                      | -10        | <b>-15</b> | 14        | 15               | 39  | 13  | 11     | 2  | 4  | 5  | 10 |
| Moldova       | -1                                      | -6         | -11        | 16        | 18               | 41  | 7   | 11     | 4  | 4  | 8  | 8  |
| Slovenia      | -1                                      | -7         | -14        | 16        | 35               | 27  | 9   | 10     | 2  | 5  | 4  | 7  |
| Spain         | -7                                      | <b>-20</b> | <b>-34</b> | 18        | 14               | 46  | 28  | 2      | 1  | 4  | 3  | 3  |
| Sweden        | 3                                       | 7          | 10         | 11        | 28               | 43  | 7   | 5      | 1  | 7  | 3  | 6  |
| Switzerland   | -0                                      | -5         | -9         | 16        | 30               | 41  | 5   | 11     | 2  | 4  | 2  | 5  |
| Tunisia       | -10                                     | -26        | <b>-40</b> | 30        | 20               | 40  | 15  | 8      | 1  | 6  | 5  | 5  |
| Turkey        | -11                                     | <b>-25</b> | <b>-35</b> | 17        | 12               | 42  | 25  | 5      | 2  | 5  | 5  | 4  |
| UK            | -4                                      | -6         | <b>-12</b> | 10        | 40               | 22  | 12  | 7      | 2  | 9  | 4  | 4  |
| Ukraine       | -3                                      | -9         | -12        | 15        | 23               | 50  | 5   | 8      | 2  | 4  | 5  | 4  |

## 5 Main results for the capitals of the domain

**Table S10.** Mean expected change response  $BM_k$ , scenario-excluded uncertainty  $BU$  and partition of the total uncertainty for the capital cities of the domain, for absolute changes of mean temperature in winter (DJF) in the near future (2021-2050) compared to the period 1981-2010. I1, I2 and I3 refer to interactions RCM/GCM, RCP/RCM and RCP/GCM, respectively. IV and RV refer to internal and residual variability, respectively. Absolute mean expected changes greater than the uncertainty ( $|BU/BM| > 1$ ) are indicated in bold font.

| Capital city     | Country         | $BM_k$ & $BU$ ( $^{\circ}\text{C}$ ) |            |            |      | % Total variance |     |     |        |    |    |    |    |
|------------------|-----------------|--------------------------------------|------------|------------|------|------------------|-----|-----|--------|----|----|----|----|
|                  |                 | RCP                                  |            |            | $BU$ | Main effects     |     |     | Inter. |    |    |    |    |
|                  |                 | 2.6                                  | 4.5        | 8.5        |      | RCM              | GCM | RCP | I1     | I2 | I3 | IV | RV |
| Amman            | Jordan          | <b>0.9</b>                           | <b>1.0</b> | <b>1.3</b> | 0.4  | 7                | 60  | 19  | 1      | 1  | 4  | 7  | 1  |
| Algiers          | Algeria         | <b>0.7</b>                           | <b>0.8</b> | <b>1.1</b> | 0.3  | 2                | 58  | 29  | 2      | 0  | 2  | 6  | 1  |
| Amsterdam        | Netherlands     | <b>0.6</b>                           | <b>0.8</b> | <b>1.1</b> | 0.3  | 4                | 44  | 27  | 5      | 1  | 6  | 10 | 3  |
| Andorra la Vella | Andorra         | <b>0.8</b>                           | <b>1.1</b> | <b>1.4</b> | 0.4  | 21               | 32  | 32  | 4      | 1  | 2  | 6  | 2  |
| Ankara           | Turkey          | <b>1.0</b>                           | <b>1.3</b> | <b>1.5</b> | 0.5  | 33               | 33  | 14  | 4      | 1  | 4  | 9  | 2  |
| Athens           | Greece          | <b>0.8</b>                           | <b>0.9</b> | <b>1.2</b> | 0.3  | 5                | 55  | 21  | 1      | 1  | 7  | 9  | 1  |
| Bayrut           | Lebanon         | <b>0.8</b>                           | <b>0.9</b> | <b>1.2</b> | 0.3  | 2                | 56  | 25  | 1      | 1  | 6  | 8  | 1  |
| Belgrade         | Serbia and M.   | <b>0.9</b>                           | <b>1.3</b> | <b>1.5</b> | 0.4  | 22               | 31  | 20  | 4      | 1  | 7  | 12 | 3  |
| Berlin           | Germany         | <b>0.7</b>                           | <b>1.0</b> | <b>1.3</b> | 0.4  | 6                | 41  | 24  | 7      | 1  | 6  | 12 | 3  |
| Bern             | Switzerland     | <b>0.8</b>                           | <b>1.1</b> | <b>1.3</b> | 0.4  | 8                | 41  | 26  | 6      | 1  | 5  | 10 | 3  |
| Bratislava       | Slovakia        | <b>0.9</b>                           | <b>1.2</b> | <b>1.5</b> | 0.5  | 17               | 32  | 23  | 7      | 1  | 5  | 11 | 3  |
| Brussels         | Belgium         | <b>0.6</b>                           | <b>0.9</b> | <b>1.1</b> | 0.3  | 7                | 32  | 30  | 7      | 1  | 8  | 11 | 3  |
| Bucharest        | Romania         | <b>1.0</b>                           | <b>1.3</b> | <b>1.6</b> | 0.5  | 26               | 28  | 18  | 4      | 1  | 6  | 13 | 5  |
| Budapest         | Hungary         | <b>0.9</b>                           | <b>1.2</b> | <b>1.5</b> | 0.4  | 22               | 27  | 24  | 6      | 1  | 5  | 12 | 3  |
| Cairo            | Egypt           | <b>0.8</b>                           | <b>0.9</b> | <b>1.2</b> | 0.3  | 14               | 45  | 27  | 1      | 1  | 4  | 6  | 1  |
| Chisinau         | Moldova         | <b>1.0</b>                           | <b>1.4</b> | <b>1.6</b> | 0.4  | 20               | 24  | 22  | 5      | 2  | 6  | 18 | 4  |
| Copenhagen       | Denmark         | <b>0.7</b>                           | <b>1.0</b> | <b>1.2</b> | 0.4  | 7                | 45  | 26  | 4      | 1  | 4  | 10 | 2  |
| Damascus         | Syria           | <b>0.9</b>                           | <b>1.1</b> | <b>1.4</b> | 0.3  | 7                | 57  | 22  | 1      | 1  | 5  | 7  | 1  |
| Douglas          | Isle of Man     | <b>0.4</b>                           | <b>0.6</b> | <b>0.8</b> | 0.3  | 10               | 47  | 29  | 3      | 0  | 2  | 8  | 1  |
| Dublin           | Ireland         | <b>0.4</b>                           | <b>0.6</b> | <b>0.8</b> | 0.3  | 7                | 49  | 30  | 2      | 0  | 2  | 9  | 1  |
| Gibraltar        | Gibraltar       | <b>0.6</b>                           | <b>0.7</b> | <b>1.0</b> | 0.2  | 6                | 49  | 30  | 2      | 1  | 4  | 6  | 3  |
| Helsinki         | Finland         | <b>1.2</b>                           | <b>1.5</b> | <b>1.9</b> | 0.7  | 13               | 46  | 14  | 9      | 1  | 4  | 10 | 3  |
| Jerusalem        | Israel          | <b>0.9</b>                           | <b>1.0</b> | <b>1.3</b> | 0.3  | 4                | 58  | 24  | 1      | 1  | 4  | 8  | 1  |
| Kiev             | Ukraine         | <b>1.0</b>                           | <b>1.3</b> | <b>1.6</b> | 0.5  | 15               | 30  | 18  | 7      | 2  | 6  | 19 | 3  |
| Lisbon           | Portugal        | <b>0.6</b>                           | <b>0.8</b> | <b>0.9</b> | 0.2  | 7                | 47  | 30  | 2      | 1  | 4  | 8  | 1  |
| Ljubljana        | Slovenia        | <b>0.9</b>                           | <b>1.2</b> | <b>1.4</b> | 0.4  | 13               | 36  | 24  | 6      | 1  | 6  | 11 | 3  |
| London           | UK              | <b>0.5</b>                           | <b>0.7</b> | <b>0.9</b> | 0.3  | 8                | 42  | 29  | 5      | 1  | 5  | 9  | 2  |
| Luxembourg       | Luxembourg      | <b>0.6</b>                           | <b>0.9</b> | <b>1.1</b> | 0.3  | 6                | 38  | 27  | 7      | 1  | 8  | 10 | 3  |
| Madrid           | Spain           | <b>0.7</b>                           | <b>0.9</b> | <b>1.1</b> | 0.3  | 11               | 43  | 33  | 2      | 1  | 2  | 7  | 1  |
| Minsk            | Belarus         | <b>1.0</b>                           | <b>1.3</b> | <b>1.6</b> | 0.5  | 10               | 34  | 20  | 9      | 2  | 5  | 17 | 4  |
| Monaco-Ville     | Monaco          | <b>0.7</b>                           | <b>0.9</b> | <b>1.2</b> | 0.3  | 6                | 51  | 30  | 2      | 0  | 3  | 6  | 2  |
| Nicosia          | Cyprus          | <b>0.8</b>                           | <b>1.0</b> | <b>1.2</b> | 0.3  | 5                | 50  | 29  | 1      | 1  | 7  | 8  | 1  |
| Oslo             | Norway          | <b>0.8</b>                           | <b>1.2</b> | <b>1.5</b> | 0.5  | 13               | 44  | 21  | 5      | 1  | 4  | 10 | 2  |
| Paris            | France          | <b>0.6</b>                           | <b>0.8</b> | <b>1.1</b> | 0.3  | 9                | 36  | 27  | 5      | 1  | 9  | 10 | 3  |
| Prague           | Czech Republic  | <b>0.8</b>                           | <b>1.1</b> | <b>1.4</b> | 0.4  | 12               | 36  | 23  | 6      | 1  | 7  | 12 | 3  |
| Rabat            | Morocco         | <b>0.6</b>                           | <b>0.8</b> | <b>1.0</b> | 0.2  | 7                | 39  | 33  | 2      | 1  | 4  | 9  | 3  |
| Riga             | Latvia          | <b>1.0</b>                           | <b>1.3</b> | <b>1.6</b> | 0.6  | 12               | 37  | 17  | 9      | 1  | 5  | 15 | 3  |
| Rome             | Italy           | <b>0.8</b>                           | <b>1.0</b> | <b>1.2</b> | 0.3  | 12               | 50  | 23  | 1      | 0  | 4  | 8  | 2  |
| Saint Helier     | Jersey          | <b>0.5</b>                           | <b>0.7</b> | <b>0.9</b> | 0.3  | 3                | 61  | 23  | 2      | 0  | 4  | 6  | 1  |
| Saint Peter Port | Guernsey and A. | <b>0.5</b>                           | <b>0.6</b> | <b>0.8</b> | 0.3  | 3                | 62  | 23  | 2      | 0  | 3  | 6  | 1  |
| San Marino       | San Marino      | <b>0.8</b>                           | <b>1.0</b> | <b>1.3</b> | 0.4  | 10               | 47  | 23  | 3      | 1  | 5  | 9  | 2  |
| Sarajevo         | Bosnia and H.   | <b>0.9</b>                           | <b>1.2</b> | <b>1.5</b> | 0.5  | 22               | 35  | 19  | 3      | 1  | 7  | 10 | 3  |
| Skopje           | Macedonia       | <b>0.9</b>                           | <b>1.2</b> | <b>1.4</b> | 0.4  | 19               | 35  | 21  | 3      | 1  | 7  | 10 | 3  |
| Sofia            | Bulgaria        | <b>0.9</b>                           | <b>1.2</b> | <b>1.4</b> | 0.4  | 19               | 31  | 22  | 2      | 0  | 9  | 13 | 4  |
| Stockholm        | Sweden          | <b>0.9</b>                           | <b>1.2</b> | <b>1.6</b> | 0.5  | 16               | 36  | 22  | 8      | 1  | 5  | 10 | 3  |
| Tallinn          | Estonia         | <b>1.1</b>                           | <b>1.3</b> | <b>1.7</b> | 0.6  | 14               | 44  | 14  | 9      | 1  | 3  | 12 | 3  |
| Tirana           | Albania         | <b>0.8</b>                           | <b>1.0</b> | <b>1.2</b> | 0.3  | 11               | 48  | 22  | 1      | 1  | 5  | 9  | 2  |
| Torshavn         | Faroe Islands   | 0.4                                  | <b>0.6</b> | <b>0.8</b> | 0.5  | 4                | 80  | 11  | 0      | 0  | 1  | 3  | 1  |
| Tripoli          | Libya           | <b>0.8</b>                           | <b>0.9</b> | <b>1.2</b> | 0.3  | 10               | 44  | 30  | 2      | 1  | 4  | 7  | 1  |
| Tunis            | Tunisia         | <b>0.8</b>                           | <b>0.9</b> | <b>1.2</b> | 0.3  | 8                | 51  | 29  | 1      | 0  | 2  | 7  | 1  |
| Vaduz            | Liechtenstein   | <b>0.8</b>                           | <b>1.1</b> | <b>1.3</b> | 0.4  | 15               | 42  | 22  | 6      | 1  | 3  | 9  | 2  |
| Valletta         | Malta           | <b>0.7</b>                           | <b>0.9</b> | <b>1.1</b> | 0.3  | 3                | 57  | 28  | 1      | 0  | 4  | 7  | 1  |
| Vatican City     | Vatican City    | <b>0.8</b>                           | <b>1.0</b> | <b>1.2</b> | 0.3  | 12               | 50  | 23  | 1      | 0  | 4  | 8  | 2  |
| Vienna           | Austria         | <b>0.8</b>                           | <b>1.2</b> | <b>1.4</b> | 0.4  | 16               | 34  | 23  | 6      | 1  | 6  | 11 | 3  |
| Vilnius          | Lithuania       | <b>1.0</b>                           | <b>1.3</b> | <b>1.6</b> | 0.5  | 9                | 34  | 21  | 8      | 2  | 5  | 17 | 4  |
| Warsaw           | Poland          | <b>0.9</b>                           | <b>1.2</b> | <b>1.5</b> | 0.5  | 10               | 37  | 20  | 9      | 2  | 6  | 13 | 4  |
| Zagreb           | Croatia         | <b>0.9</b>                           | <b>1.2</b> | <b>1.5</b> | 0.4  | 18               | 29  | 23  | 8      | 1  | 6  | 11 | 4  |

**Table S11.** Absolute changes of mean temperature in winter (DJF) at the end of the century (2071-2099) compared to the period 1981-2010 (see legend of Table S10 for further details).

| Capital city     | Country         | <i>BM<sub>k</sub> &amp; BU</i> (°C) |            |            |           | % Total variance |     |     |        |    |    |    |    |
|------------------|-----------------|-------------------------------------|------------|------------|-----------|------------------|-----|-----|--------|----|----|----|----|
|                  |                 | 2.6                                 | 4.5        | 8.5        | <i>BU</i> | Main effects     |     |     | Inter. |    |    |    |    |
|                  |                 | RCP                                 |            |            |           | RCM              | GCM | RCP | I1     | I2 | I3 | IV | RV |
| Amman            | Jordan          | <b>1.5</b>                          | <b>2.0</b> | <b>3.7</b> | 0.8       | 3                | 34  | 59  | 0      | 0  | 1  | 1  | 1  |
| Algiers          | Algeria         | <b>0.9</b>                          | <b>1.6</b> | <b>2.8</b> | 0.4       | 1                | 20  | 75  | 0      | 0  | 2  | 1  | 0  |
| Amsterdam        | Netherlands     | <b>0.7</b>                          | <b>1.6</b> | <b>2.8</b> | 0.6       | 2                | 17  | 71  | 2      | 1  | 4  | 1  | 1  |
| Andorra la Vella | Andorra         | <b>0.8</b>                          | <b>2.0</b> | <b>3.8</b> | 0.8       | 12               | 11  | 70  | 1      | 1  | 2  | 1  | 1  |
| Ankara           | Turkey          | <b>1.5</b>                          | <b>2.2</b> | <b>3.9</b> | 1.0       | 22               | 20  | 51  | 2      | 2  | 1  | 1  | 1  |
| Athens           | Greece          | <b>1.2</b>                          | <b>1.8</b> | <b>3.2</b> | 0.7       | 2                | 39  | 56  | 0      | 0  | 2  | 1  | 0  |
| Bayrut           | Lebanon         | <b>1.3</b>                          | <b>1.8</b> | <b>3.2</b> | 0.6       | 1                | 31  | 65  | 0      | 0  | 1  | 1  | 0  |
| Belgrade         | Serbia and M.   | <b>1.4</b>                          | <b>2.2</b> | <b>3.7</b> | 0.8       | 8                | 26  | 56  | 2      | 1  | 3  | 2  | 2  |
| Berlin           | Germany         | <b>0.8</b>                          | <b>1.9</b> | <b>3.4</b> | 0.8       | 4                | 22  | 65  | 2      | 1  | 4  | 1  | 2  |
| Bern             | Switzerland     | <b>1.0</b>                          | <b>2.0</b> | <b>3.4</b> | 0.7       | 5                | 19  | 66  | 2      | 2  | 4  | 1  | 1  |
| Bratislava       | Slovakia        | <b>1.3</b>                          | <b>2.3</b> | <b>3.8</b> | 0.9       | 9                | 22  | 60  | 2      | 1  | 3  | 2  | 2  |
| Brussels         | Belgium         | <b>0.7</b>                          | <b>1.6</b> | <b>2.8</b> | 0.6       | 4                | 18  | 68  | 2      | 1  | 5  | 1  | 2  |
| Bucharest        | Romania         | <b>1.5</b>                          | <b>2.4</b> | <b>4.2</b> | 0.9       | 12               | 19  | 58  | 2      | 2  | 4  | 2  | 2  |
| Budapest         | Hungary         | <b>1.4</b>                          | <b>2.2</b> | <b>3.8</b> | 0.9       | 11               | 21  | 59  | 2      | 1  | 3  | 2  | 2  |
| Cairo            | Egypt           | <b>1.2</b>                          | <b>1.8</b> | <b>3.4</b> | 0.7       | 6                | 27  | 64  | 1      | 1  | 1  | 1  | 1  |
| Chisinau         | Moldova         | <b>1.5</b>                          | <b>2.3</b> | <b>4.2</b> | 1.0       | 12               | 19  | 58  | 2      | 1  | 4  | 2  | 2  |
| Copenhagen       | Denmark         | <b>0.9</b>                          | <b>1.9</b> | <b>3.2</b> | 0.7       | 3                | 26  | 64  | 2      | 0  | 3  | 1  | 1  |
| Damascus         | Syria           | <b>1.4</b>                          | <b>2.1</b> | <b>3.8</b> | 0.7       | 3                | 29  | 64  | 0      | 0  | 1  | 1  | 1  |
| Douglas          | Isle of Man     | 0.4                                 | <b>1.2</b> | <b>2.3</b> | 0.5       | 3                | 16  | 73  | 2      | 0  | 4  | 1  | 1  |
| Dublin           | Ireland         | 0.4                                 | <b>1.2</b> | <b>2.2</b> | 0.5       | 3                | 16  | 71  | 2      | 1  | 5  | 1  | 1  |
| Gibraltar        | Gibraltar       | <b>0.7</b>                          | <b>1.4</b> | <b>2.5</b> | 0.4       | 2                | 17  | 76  | 1      | 0  | 2  | 1  | 1  |
| Helsinki         | Finland         | <b>1.4</b>                          | <b>2.9</b> | <b>4.7</b> | 1.3       | 7                | 33  | 50  | 2      | 1  | 4  | 2  | 2  |
| Jerusalem        | Israel          | <b>1.4</b>                          | <b>2.0</b> | <b>3.6</b> | 0.7       | 2                | 32  | 63  | 0      | 0  | 1  | 1  | 1  |
| Kiev             | Ukraine         | <b>1.4</b>                          | <b>2.4</b> | <b>4.5</b> | 1.0       | 9                | 19  | 60  | 2      | 1  | 5  | 2  | 2  |
| Lisbon           | Portugal        | <b>0.8</b>                          | <b>1.4</b> | <b>2.5</b> | 0.4       | 2                | 17  | 76  | 1      | 0  | 2  | 1  | 1  |
| Ljubljana        | Slovenia        | <b>1.2</b>                          | <b>2.2</b> | <b>3.7</b> | 0.7       | 4                | 20  | 66  | 2      | 1  | 3  | 1  | 2  |
| London           | UK              | <b>0.6</b>                          | <b>1.4</b> | <b>2.5</b> | 0.5       | 4                | 16  | 70  | 2      | 1  | 5  | 1  | 2  |
| Luxemburg        | Luxembourg      | <b>0.8</b>                          | <b>1.7</b> | <b>3.0</b> | 0.6       | 4                | 20  | 67  | 2      | 1  | 4  | 1  | 1  |
| Madrid           | Spain           | <b>0.8</b>                          | <b>1.6</b> | <b>2.9</b> | 0.5       | 5                | 14  | 76  | 1      | 1  | 2  | 1  | 1  |
| Minsk            | Belarus         | <b>1.2</b>                          | <b>2.5</b> | <b>4.6</b> | 1.2       | 6                | 25  | 58  | 2      | 1  | 4  | 2  | 2  |
| Monaco-Ville     | Monaco          | <b>1.0</b>                          | <b>1.8</b> | <b>3.1</b> | 0.5       | 3                | 21  | 71  | 1      | 1  | 2  | 1  | 1  |
| Nicosia          | Cyprus          | <b>1.3</b>                          | <b>1.9</b> | <b>3.4</b> | 0.6       | 1                | 27  | 69  | 0      | 0  | 1  | 1  | 0  |
| Oslo             | Norway          | 0.9                                 | <b>2.3</b> | <b>4.0</b> | 1.1       | 7                | 31  | 54  | 2      | 0  | 3  | 1  | 1  |
| Paris            | France          | <b>0.7</b>                          | <b>1.6</b> | <b>2.8</b> | 0.5       | 3                | 15  | 71  | 2      | 1  | 5  | 1  | 1  |
| Prague           | Czech Republic  | <b>1.0</b>                          | <b>2.0</b> | <b>3.6</b> | 0.8       | 8                | 21  | 62  | 2      | 1  | 3  | 2  | 2  |
| Rabat            | Morocco         | <b>0.8</b>                          | <b>1.4</b> | <b>2.7</b> | 0.4       | 3                | 11  | 80  | 1      | 1  | 2  | 1  | 1  |
| Riga             | Latvia          | 1.0                                 | <b>2.5</b> | <b>4.4</b> | 1.3       | 6                | 28  | 55  | 2      | 1  | 5  | 2  | 2  |
| Rome             | Italy           | <b>1.2</b>                          | <b>1.8</b> | <b>3.2</b> | 0.6       | 3                | 31  | 61  | 1      | 1  | 1  | 1  | 1  |
| Saint Helier     | Jersey          | <b>0.6</b>                          | <b>1.2</b> | <b>2.3</b> | 0.5       | 1                | 23  | 68  | 1      | 1  | 4  | 1  | 1  |
| Saint Peter Port | Guernsey and A. | <b>0.6</b>                          | <b>1.2</b> | <b>2.3</b> | 0.5       | 1                | 22  | 69  | 1      | 1  | 4  | 1  | 1  |
| San Marino       | San Marino      | <b>1.2</b>                          | <b>2.0</b> | <b>3.4</b> | 0.7       | 5                | 27  | 61  | 1      | 1  | 2  | 1  | 1  |
| Sarajevo         | Bosnia and H.   | <b>1.5</b>                          | <b>2.3</b> | <b>3.9</b> | 0.9       | 10               | 29  | 53  | 2      | 1  | 2  | 2  | 2  |
| Skopje           | Macedonia       | <b>1.3</b>                          | <b>2.1</b> | <b>3.7</b> | 0.8       | 8                | 24  | 60  | 2      | 1  | 2  | 1  | 1  |
| Sofia            | Bulgaria        | <b>1.5</b>                          | <b>2.2</b> | <b>3.9</b> | 0.9       | 8                | 27  | 56  | 1      | 1  | 3  | 2  | 1  |
| Stockholm        | Sweden          | 1.1                                 | <b>2.3</b> | <b>3.9</b> | 1.1       | 6                | 35  | 51  | 2      | 0  | 3  | 1  | 1  |
| Tallinn          | Estonia         | 1.2                                 | <b>2.7</b> | <b>4.4</b> | 1.3       | 7                | 32  | 51  | 2      | 1  | 4  | 2  | 2  |
| Tirana           | Albania         | <b>1.3</b>                          | <b>1.9</b> | <b>3.2</b> | 0.7       | 5                | 34  | 56  | 1      | 1  | 1  | 1  | 1  |
| Torshavn         | Faroe Islands   | 0.4                                 | <b>1.2</b> | <b>2.0</b> | 0.9       | 2                | 59  | 34  | 1      | 0  | 2  | 1  | 1  |
| Tripoli          | Libya           | <b>1.2</b>                          | <b>1.8</b> | <b>3.3</b> | 0.6       | 3                | 26  | 67  | 1      | 0  | 2  | 1  | 1  |
| Tunis            | Tunisia         | <b>1.1</b>                          | <b>1.8</b> | <b>3.1</b> | 0.5       | 2                | 24  | 70  | 0      | 0  | 2  | 1  | 1  |
| Vaduz            | Liechtenstein   | <b>1.0</b>                          | <b>2.0</b> | <b>3.5</b> | 0.8       | 8                | 20  | 62  | 3      | 1  | 3  | 1  | 2  |
| Valletta         | Malta           | <b>1.1</b>                          | <b>1.7</b> | <b>3.0</b> | 0.6       | 1                | 32  | 64  | 0      | 0  | 1  | 1  | 0  |
| Vatican City     | Vatican City    | <b>1.2</b>                          | <b>1.8</b> | <b>3.2</b> | 0.6       | 3                | 31  | 61  | 1      | 1  | 1  | 1  | 1  |
| Vienna           | Austria         | <b>1.2</b>                          | <b>2.2</b> | <b>3.7</b> | 0.8       | 7                | 21  | 62  | 2      | 1  | 3  | 2  | 2  |
| Vilnius          | Lithuania       | 1.1                                 | <b>2.4</b> | <b>4.4</b> | 1.2       | 7                | 27  | 55  | 2      | 1  | 5  | 2  | 2  |
| Warsaw           | Poland          | 1.0                                 | <b>2.2</b> | <b>4.0</b> | 1.1       | 7                | 29  | 53  | 3      | 1  | 4  | 1  | 2  |
| Zagreb           | Croatia         | <b>1.2</b>                          | <b>2.2</b> | <b>3.8</b> | 0.9       | 8                | 23  | 60  | 2      | 2  | 3  | 2  | 2  |

**Table S12.** Relative changes of total precipitation in winter (DJF) in the near future (2021-2050) compared to the period 1981-2010 (see legend of Table S10 for further details).

| Capital city     | Country         | <i>BM<sub>k</sub></i> & <i>BU</i> (%) |            |            |           | % Total variance |     |     |        |    |    |    |    |
|------------------|-----------------|---------------------------------------|------------|------------|-----------|------------------|-----|-----|--------|----|----|----|----|
|                  |                 | RCP                                   |            |            | <i>BU</i> | Main effects     |     |     | Inter. |    |    |    |    |
|                  |                 | 2.6                                   | 4.5        | 8.5        |           |                  | RCM | GCM | RCP    | I1 | I2 | I3 | IV |
| Amman            | Jordan          | -8                                    | <b>-9</b>  | <b>-11</b> | 9         | 10               | 24  | 3   | 7      | 1  | 10 | 40 | 5  |
| Algiers          | Algeria         | -2                                    | -6         | <b>-8</b>  | 6         | 11               | 19  | 9   | 4      | 2  | 8  | 41 | 6  |
| Amsterdam        | Netherlands     | 3                                     | 4          | <b>8</b>   | 5         | 26               | 19  | 13  | 3      | 1  | 4  | 30 | 3  |
| Andorra la Vella | Andorra         | 3                                     | 1          | -2         | 8         | 20               | 19  | 8   | 8      | 2  | 6  | 31 | 5  |
| Ankara           | Turkey          | 2                                     | 0          | 1          | 7         | 15               | 40  | 1   | 4      | 1  | 4  | 33 | 2  |
| Athens           | Greece          | 0                                     | -3         | -2         | 9         | 6                | 56  | 3   | 2      | 1  | 2  | 27 | 3  |
| Bayrut           | Lebanon         | -2                                    | -3         | -4         | 8         | 15               | 39  | 1   | 6      | 0  | 8  | 29 | 3  |
| Belgrade         | Serbia and M.   | 5                                     | 6          | 7          | 7         | 17               | 34  | 2   | 11     | 1  | 6  | 24 | 6  |
| Berlin           | Germany         | 1                                     | 4          | <b>8</b>   | 6         | 23               | 28  | 17  | 2      | 1  | 4  | 22 | 3  |
| Bern             | Switzerland     | 4                                     | <b>6</b>   | <b>8</b>   | 6         | 3                | 39  | 7   | 6      | 1  | 6  | 34 | 5  |
| Bratislava       | Slovakia        | 6                                     | 6          | <b>10</b>  | 8         | 17               | 32  | 6   | 9      | 1  | 3  | 26 | 5  |
| Brussels         | Belgium         | 3                                     | 4          | <b>7</b>   | 5         | 24               | 17  | 12  | 3      | 1  | 5  | 36 | 2  |
| Bucharest        | Romania         | 5                                     | 5          | 7          | 9         | 25               | 18  | 1   | 9      | 3  | 8  | 30 | 5  |
| Budapest         | Hungary         | 5                                     | 6          | <b>8</b>   | 7         | 14               | 28  | 2   | 10     | 1  | 7  | 34 | 4  |
| Cairo            | Egypt           | -10                                   | -3         | -10        | 14        | 19               | 20  | 5   | 9      | 2  | 8  | 31 | 6  |
| Chisinau         | Moldova         | 4                                     | 3          | 7          | 8         | 17               | 27  | 4   | 4      | 3  | 6  | 33 | 7  |
| Copenhagen       | Denmark         | 2                                     | 4          | <b>7</b>   | 5         | 23               | 10  | 12  | 11     | 2  | 3  | 31 | 9  |
| Damascus         | Syria           | -4                                    | -5         | -7         | 9         | 19               | 27  | 3   | 4      | 2  | 7  | 33 | 5  |
| Douglas          | Isle of Man     | 3                                     | 4          | <b>7</b>   | 4         | 22               | 8   | 14  | 11     | 4  | 9  | 27 | 5  |
| Dublin           | Ireland         | 4                                     | 4          | 6          | 6         | 43               | 11  | 3   | 12     | 3  | 4  | 20 | 5  |
| Gibraltar        | Gibraltar       | 0                                     | -6         | <b>-13</b> | 9         | 20               | 9   | 25  | 7      | 0  | 3  | 33 | 3  |
| Helsinki         | Finland         | 1                                     | 3          | <b>6</b>   | 5         | 20               | 26  | 11  | 3      | 2  | 4  | 31 | 4  |
| Jerusalem        | Israel          | -8                                    | <b>-10</b> | <b>-11</b> | 8         | 23               | 14  | 2   | 6      | 2  | 9  | 39 | 4  |
| Kiev             | Ukraine         | 3                                     | 4          | <b>7</b>   | 6         | 12               | 39  | 6   | 6      | 0  | 4  | 28 | 4  |
| Lisbon           | Portugal        | 1                                     | -2         | -7         | 8         | 7                | 28  | 15  | 2      | 1  | 7  | 37 | 2  |
| Ljubljana        | Slovenia        | 7                                     | 5          | <b>8</b>   | 7         | 11               | 16  | 4   | 7      | 1  | 11 | 44 | 5  |
| London           | UK              | 3                                     | 4          | <b>7</b>   | 5         | 24               | 15  | 13  | 5      | 1  | 5  | 34 | 3  |
| Luxemburg        | Luxembourg      | 4                                     | 5          | <b>7</b>   | 5         | 32               | 16  | 7   | 2      | 1  | 4  | 35 | 3  |
| Madrid           | Spain           | 3                                     | 1          | -4         | 8         | 8                | 25  | 12  | 3      | 1  | 9  | 40 | 2  |
| Minsk            | Belarus         | 3                                     | 5          | <b>8</b>   | 5         | 25               | 21  | 15  | 4      | 1  | 2  | 28 | 4  |
| Monaco-Ville     | Monaco          | 9                                     | 5          | 1          | 10        | 9                | 19  | 10  | 5      | 1  | 14 | 36 | 5  |
| Nicosia          | Cyprus          | -3                                    | -5         | <b>-9</b>  | 7         | 9                | 18  | 10  | 8      | 2  | 8  | 40 | 5  |
| Oslo             | Norway          | 2                                     | 5          | <b>9</b>   | 5         | 13               | 20  | 18  | 5      | 2  | 5  | 34 | 3  |
| Paris            | France          | 4                                     | 5          | <b>8</b>   | 5         | 30               | 17  | 10  | 2      | 1  | 2  | 34 | 3  |
| Prague           | Czech Republic  | 4                                     | 7          | <b>11</b>  | 7         | 26               | 33  | 13  | 2      | 1  | 5  | 18 | 3  |
| Rabat            | Morocco         | 0                                     | <b>-10</b> | <b>-16</b> | 9         | 12               | 12  | 31  | 4      | 1  | 6  | 32 | 3  |
| Riga             | Latvia          | 1                                     | 3          | <b>6</b>   | 5         | 26               | 19  | 13  | 5      | 2  | 2  | 28 | 5  |
| Rome             | Italy           | 6                                     | 0          | 1          | 7         | 10               | 25  | 11  | 5      | 1  | 6  | 38 | 4  |
| Saint Helier     | Jersey          | 1                                     | 2          | <b>5</b>   | 5         | 12               | 23  | 10  | 5      | 1  | 2  | 42 | 5  |
| Saint Peter Port | Guernsey and A. | 2                                     | 3          | <b>6</b>   | 4         | 11               | 23  | 10  | 5      | 1  | 3  | 43 | 3  |
| San Marino       | San Marino      | 2                                     | 0          | 2          | 9         | 17               | 17  | 2   | 13     | 1  | 7  | 34 | 10 |
| Sarajevo         | Bosnia and H.   | 3                                     | 4          | 5          | 8         | 42               | 23  | 2   | 4      | 3  | 4  | 19 | 2  |
| Skopje           | Macedonia       | 4                                     | 2          | 5          | 9         | 27               | 26  | 2   | 10     | 1  | 2  | 27 | 5  |
| Sofia            | Bulgaria        | 2                                     | 2          | 5          | 7         | 25               | 15  | 5   | 11     | 1  | 5  | 33 | 5  |
| Stockholm        | Sweden          | 2                                     | 4          | <b>6</b>   | 5         | 29               | 25  | 10  | 3      | 2  | 2  | 27 | 3  |
| Tallinn          | Estonia         | 2                                     | 3          | 6          | 6         | 37               | 24  | 8   | 5      | 1  | 2  | 20 | 3  |
| Tirana           | Albania         | 4                                     | 1          | 1          | 6         | 10               | 25  | 4   | 7      | 2  | 8  | 40 | 4  |
| Torshavn         | Faroe Islands   | -2                                    | 0          | -1         | 6         | 29               | 38  | 1   | 7      | 2  | 3  | 16 | 3  |
| Tripoli          | Libya           | -6                                    | -8         | -8         | 13        | 14               | 56  | 1   | 3      | 1  | 2  | 19 | 3  |
| Tunis            | Tunisia         | -3                                    | -6         | -7         | 9         | 12               | 37  | 3   | 7      | 1  | 3  | 32 | 6  |
| Vaduz            | Liechtenstein   | 2                                     | 4          | 6          | 7         | 9                | 37  | 4   | 8      | 1  | 6  | 30 | 5  |
| Valletta         | Malta           | -3                                    | -7         | -7         | 9         | 28               | 30  | 5   | 4      | 1  | 2  | 26 | 4  |
| Vatican City     | Vatican City    | 6                                     | 0          | 1          | 7         | 10               | 25  | 11  | 5      | 1  | 6  | 38 | 4  |
| Vienna           | Austria         | 4                                     | 4          | <b>9</b>   | 8         | 21               | 31  | 7   | 7      | 1  | 2  | 24 | 6  |
| Vilnius          | Lithuania       | 2                                     | 3          | <b>7</b>   | 4         | 25               | 16  | 21  | 3      | 1  | 2  | 29 | 3  |
| Warsaw           | Poland          | 2                                     | 4          | <b>8</b>   | 5         | 22               | 29  | 17  | 3      | 1  | 2  | 23 | 4  |
| Zagreb           | Croatia         | <b>8</b>                              | <b>7</b>   | <b>10</b>  | 7         | 11               | 27  | 4   | 6      | 1  | 9  | 36 | 6  |

**Table S13.** Relative changes of total precipitation in winter (DJF) at the end of the century (2071-2099) compared to the period 1981-2010 (see legend of Table S10 for further details).

| Capital city     | Country         | <i>BM<sub>k</sub></i> & <i>BU</i> (%) |            |            |           | % Total variance |     |    |        |    |    |    |    |
|------------------|-----------------|---------------------------------------|------------|------------|-----------|------------------|-----|----|--------|----|----|----|----|
|                  |                 | RCP                                   |            |            | <i>BU</i> | Main effects     |     |    | Inter. |    | IV | RV |    |
| 2.6              | 4.5             | 8.5                                   |            | RCM        |           | GCM              | RCP | I1 | I2     | I3 |    |    |    |
| Amman            | Jordan          | <b>-19</b>                            | <b>-18</b> | <b>-29</b> | 15        | 13               | 40  | 10 | 8      | 2  | 9  | 12 | 6  |
| Algiers          | Algeria         | -1                                    | -12        | <b>-17</b> | 14        | 11               | 31  | 19 | 5      | 3  | 17 | 9  | 6  |
| Amsterdam        | Netherlands     | 5                                     | 9          | <b>20</b>  | 10        | 28               | 22  | 28 | 3      | 2  | 7  | 7  | 4  |
| Andorra la Vella | Andorra         | 9                                     | 2          | -8         | 14        | 24               | 17  | 21 | 9      | 4  | 11 | 8  | 7  |
| Ankara           | Turkey          | 3                                     | 0          | 0          | 12        | 19               | 53  | 2  | 6      | 1  | 3  | 10 | 6  |
| Athens           | Greece          | 1                                     | -8         | -8         | 16        | 4                | 62  | 7  | 3      | 4  | 4  | 9  | 6  |
| Bayrut           | Lebanon         | -7                                    | -6         | -13        | 15        | 19               | 56  | 4  | 5      | 1  | 5  | 7  | 3  |
| Belgrade         | Serbia and M.   | 7                                     | 11         | <b>15</b>  | 14        | 21               | 36  | 5  | 11     | 1  | 9  | 7  | 9  |
| Berlin           | Germany         | 1                                     | 9          | <b>19</b>  | 10        | 23               | 21  | 34 | 3      | 1  | 7  | 6  | 5  |
| Bern             | Switzerland     | 7                                     | <b>13</b>  | <b>18</b>  | 10        | 4                | 44  | 18 | 5      | 2  | 7  | 11 | 9  |
| Bratislava       | Slovakia        | 11                                    | 9          | <b>22</b>  | 14        | 13               | 42  | 13 | 10     | 1  | 6  | 7  | 7  |
| Brussels         | Belgium         | 5                                     | <b>9</b>   | <b>19</b>  | 9         | 26               | 13  | 34 | 4      | 2  | 10 | 10 | 2  |
| Bucharest        | Romania         | 10                                    | 8          | 16         | 18        | 28               | 20  | 3  | 13     | 5  | 15 | 8  | 8  |
| Budapest         | Hungary         | 12                                    | 9          | <b>19</b>  | 14        | 14               | 34  | 8  | 12     | 3  | 13 | 8  | 8  |
| Cairo            | Egypt           | -23                                   | -9         | <b>-26</b> | 24        | 17               | 26  | 9  | 13     | 4  | 12 | 11 | 9  |
| Chisinau         | Moldova         | 7                                     | 3          | <b>14</b>  | 14        | 15               | 22  | 11 | 8      | 5  | 17 | 11 | 11 |
| Copenhagen       | Denmark         | 4                                     | 9          | <b>18</b>  | 11        | 26               | 11  | 23 | 13     | 3  | 6  | 6  | 12 |
| Damascus         | Syria           | -11                                   | -14        | <b>-21</b> | 16        | 22               | 40  | 7  | 3      | 5  | 6  | 9  | 9  |
| Douglas          | Isle of Man     | 6                                     | <b>10</b>  | <b>17</b>  | 9         | 21               | 17  | 22 | 11     | 5  | 11 | 6  | 6  |
| Dublin           | Ireland         | 8                                     | 9          | <b>14</b>  | 13        | 51               | 12  | 5  | 14     | 3  | 5  | 5  | 6  |
| Gibraltar        | Gibraltar       | 4                                     | <b>-15</b> | <b>-32</b> | 13        | 15               | 7   | 55 | 5      | 1  | 6  | 9  | 3  |
| Helsinki         | Finland         | 2                                     | 7          | <b>16</b>  | 9         | 21               | 24  | 28 | 2      | 2  | 9  | 7  | 6  |
| Jerusalem        | Israel          | <b>-20</b>                            | <b>-20</b> | <b>-30</b> | 14        | 20               | 36  | 9  | 8      | 3  | 6  | 12 | 6  |
| Kiev             | Ukraine         | 6                                     | 6          | <b>15</b>  | 11        | 14               | 38  | 14 | 8      | 1  | 8  | 9  | 8  |
| Lisbon           | Portugal        | 6                                     | -4         | <b>-19</b> | 15        | 6                | 33  | 31 | 3      | 2  | 14 | 8  | 4  |
| Ljubljana        | Slovenia        | <b>18</b>                             | 9          | <b>20</b>  | 13        | 12               | 24  | 13 | 11     | 1  | 19 | 12 | 8  |
| London           | UK              | 5                                     | 7          | <b>17</b>  | 9         | 31               | 17  | 23 | 5      | 2  | 9  | 9  | 3  |
| Luxemburg        | Luxembourg      | 6                                     | <b>10</b>  | <b>18</b>  | 10        | 38               | 18  | 19 | 3      | 1  | 8  | 9  | 4  |
| Madrid           | Spain           | 11                                    | 0          | -12        | 15        | 13               | 34  | 27 | 3      | 2  | 8  | 10 | 3  |
| Minsk            | Belarus         | 5                                     | 9          | <b>20</b>  | 10        | 31               | 15  | 31 | 3      | 2  | 6  | 6  | 5  |
| Monaco-Ville     | Monaco          | <b>23</b>                             | 8          | -1         | 20        | 11               | 23  | 19 | 7      | 2  | 22 | 9  | 8  |
| Nicosia          | Cyprus          | -9                                    | <b>-15</b> | <b>-24</b> | 14        | 15               | 35  | 16 | 7      | 3  | 7  | 10 | 7  |
| Oslo             | Norway          | 5                                     | <b>10</b>  | <b>21</b>  | 9         | 18               | 19  | 34 | 5      | 3  | 7  | 10 | 4  |
| Paris            | France          | 7                                     | <b>11</b>  | <b>19</b>  | 9         | 32               | 20  | 22 | 3      | 2  | 7  | 9  | 5  |
| Prague           | Czech Republic  | 5                                     | 12         | <b>24</b>  | 13        | 26               | 31  | 26 | 3      | 1  | 4  | 5  | 5  |
| Rabat            | Morocco         | 6                                     | <b>-23</b> | <b>-38</b> | 15        | 11               | 7   | 59 | 4      | 1  | 9  | 7  | 3  |
| Riga             | Latvia          | 2                                     | 7          | <b>17</b>  | 10        | 38               | 13  | 28 | 3      | 2  | 5  | 6  | 5  |
| Rome             | Italy           | 12                                    | -4         | 0          | 13        | 16               | 22  | 21 | 8      | 2  | 15 | 10 | 7  |
| Saint Helier     | Jersey          | 4                                     | 4          | <b>13</b>  | 8         | 17               | 26  | 20 | 6      | 2  | 9  | 12 | 8  |
| Saint Peter Port | Guernsey and A. | 5                                     | 5          | <b>13</b>  | 8         | 13               | 33  | 16 | 6      | 2  | 13 | 12 | 6  |
| San Marino       | San Marino      | 7                                     | 0          | 4          | 16        | 21               | 23  | 4  | 14     | 1  | 14 | 11 | 13 |
| Sarajevo         | Bosnia and H.   | 3                                     | 6          | 12         | 15        | 46               | 21  | 7  | 5      | 6  | 7  | 5  | 4  |
| Skopje           | Macedonia       | 9                                     | 3          | 12         | 17        | 37               | 26  | 5  | 12     | 1  | 3  | 7  | 9  |
| Sofia            | Bulgaria        | 4                                     | 3          | 12         | 13        | 29               | 27  | 8  | 14     | 1  | 6  | 8  | 7  |
| Stockholm        | Sweden          | 3                                     | 7          | <b>16</b>  | 10        | 32               | 26  | 23 | 4      | 2  | 4  | 6  | 3  |
| Tallinn          | Estonia         | 1                                     | 7          | <b>18</b>  | 13        | 40               | 19  | 24 | 3      | 2  | 5  | 4  | 2  |
| Tirana           | Albania         | 7                                     | 2          | 4          | 11        | 20               | 25  | 3  | 12     | 2  | 16 | 12 | 8  |
| Torshavn         | Faroe Islands   | -3                                    | -1         | -1         | 11        | 23               | 52  | 1  | 10     | 3  | 4  | 4  | 4  |
| Tripoli          | Libya           | -14                                   | -15        | -20        | 26        | 16               | 67  | 1  | 3      | 2  | 4  | 5  | 3  |
| Tunis            | Tunisia         | -8                                    | -12        | -16        | 16        | 13               | 51  | 4  | 7      | 3  | 7  | 9  | 6  |
| Vaduz            | Liechtenstein   | 0                                     | 8          | <b>13</b>  | 13        | 10               | 41  | 15 | 12     | 1  | 6  | 9  | 7  |
| Valletta         | Malta           | -6                                    | -13        | <b>-19</b> | 17        | 31               | 36  | 9  | 5      | 2  | 6  | 7  | 5  |
| Vatican City     | Vatican City    | 12                                    | -4         | 0          | 13        | 16               | 22  | 21 | 8      | 2  | 15 | 10 | 7  |
| Vienna           | Austria         | 7                                     | 5          | <b>20</b>  | 15        | 18               | 40  | 16 | 7      | 1  | 5  | 6  | 9  |
| Vilnius          | Lithuania       | 2                                     | 7          | <b>18</b>  | 8         | 31               | 13  | 37 | 3      | 1  | 4  | 6  | 5  |
| Warsaw           | Poland          | 3                                     | <b>10</b>  | <b>18</b>  | 10        | 27               | 27  | 29 | 2      | 1  | 3  | 6  | 5  |
| Zagreb           | Croatia         | <b>17</b>                             | 12         | <b>24</b>  | 13        | 15               | 24  | 13 | 8      | 1  | 19 | 10 | 10 |

**Table S14.** Absolute changes of mean temperature in summer (JJA) in the near future (2021-2050) compared to the period 1981-2010 (see legend of Table S10 for further details).

| Capital city     | Country         | <i>BM<sub>k</sub> &amp; BU</i> (°C) |            |            |           | % Total variance |     |     |        |    |    |    |   |
|------------------|-----------------|-------------------------------------|------------|------------|-----------|------------------|-----|-----|--------|----|----|----|---|
|                  |                 | 2.6                                 | 4.5        | 8.5        | <i>BU</i> | Main effects     |     |     | Inter. |    | IV | RV |   |
|                  |                 | RCP                                 |            |            |           | RCM              | GCM | RCP | I1     | I2 | I3 |    |   |
| Amman            | Jordan          | <b>1.2</b>                          | <b>1.5</b> | <b>1.9</b> | 0.5       | 6                | 60  | 28  | 1      | 0  | 1  | 3  | 0 |
| Algiers          | Algeria         | <b>0.9</b>                          | <b>1.1</b> | <b>1.3</b> | 0.3       | 3                | 66  | 23  | 1      | 0  | 1  | 4  | 1 |
| Amsterdam        | Netherlands     | <b>0.8</b>                          | <b>0.9</b> | <b>1.1</b> | 0.4       | 12               | 62  | 11  | 4      | 1  | 2  | 6  | 1 |
| Andorra la Vella | Andorra         | <b>1.1</b>                          | <b>1.5</b> | <b>1.8</b> | 0.5       | 18               | 44  | 24  | 5      | 1  | 2  | 4  | 2 |
| Ankara           | Turkey          | <b>1.3</b>                          | <b>1.6</b> | <b>2.1</b> | 0.5       | 14               | 52  | 27  | 2      | 1  | 1  | 3  | 1 |
| Athens           | Greece          | <b>1.2</b>                          | <b>1.5</b> | <b>1.9</b> | 0.5       | 18               | 49  | 25  | 2      | 0  | 1  | 3  | 1 |
| Bayrut           | Lebanon         | <b>1.0</b>                          | <b>1.1</b> | <b>1.5</b> | 0.3       | 3                | 63  | 28  | 1      | 0  | 1  | 3  | 0 |
| Belgrade         | Serbia and M.   | <b>1.2</b>                          | <b>1.5</b> | <b>1.9</b> | 0.7       | 29               | 46  | 14  | 4      | 0  | 1  | 4  | 1 |
| Berlin           | Germany         | <b>0.9</b>                          | <b>1.1</b> | <b>1.3</b> | 0.5       | 30               | 47  | 8   | 4      | 1  | 1  | 6  | 3 |
| Bern             | Switzerland     | <b>1.0</b>                          | <b>1.3</b> | <b>1.5</b> | 0.5       | 29               | 44  | 12  | 6      | 1  | 1  | 5  | 2 |
| Bratislava       | Slovakia        | <b>1.1</b>                          | <b>1.3</b> | <b>1.5</b> | 0.6       | 35               | 43  | 10  | 3      | 1  | 1  | 5  | 2 |
| Brussels         | Belgium         | <b>0.8</b>                          | <b>1.0</b> | <b>1.2</b> | 0.5       | 26               | 47  | 10  | 5      | 1  | 2  | 7  | 2 |
| Bucharest        | Romania         | <b>1.2</b>                          | <b>1.5</b> | <b>1.9</b> | 0.7       | 27               | 49  | 16  | 3      | 0  | 1  | 3  | 1 |
| Budapest         | Hungary         | <b>1.1</b>                          | <b>1.4</b> | <b>1.6</b> | 0.7       | 38               | 42  | 9   | 3      | 1  | 1  | 5  | 2 |
| Cairo            | Egypt           | <b>1.2</b>                          | <b>1.4</b> | <b>1.8</b> | 0.4       | 4                | 61  | 30  | 1      | 0  | 1  | 2  | 0 |
| Chisinau         | Moldova         | <b>1.2</b>                          | <b>1.4</b> | <b>1.8</b> | 0.7       | 30               | 47  | 13  | 3      | 0  | 1  | 4  | 2 |
| Copenhagen       | Denmark         | <b>0.9</b>                          | <b>1.0</b> | <b>1.3</b> | 0.4       | 17               | 59  | 13  | 2      | 1  | 1  | 6  | 1 |
| Damascus         | Syria           | <b>1.3</b>                          | <b>1.6</b> | <b>2.0</b> | 0.4       | 5                | 56  | 33  | 1      | 0  | 1  | 3  | 0 |
| Douglas          | Isle of Man     | <b>0.6</b>                          | <b>0.7</b> | <b>0.9</b> | 0.4       | 12               | 66  | 10  | 2      | 0  | 3  | 5  | 1 |
| Dublin           | Ireland         | <b>0.6</b>                          | <b>0.7</b> | <b>0.9</b> | 0.4       | 16               | 57  | 14  | 2      | 1  | 3  | 6  | 2 |
| Gibraltar        | Gibraltar       | <b>0.7</b>                          | <b>0.9</b> | <b>1.1</b> | 0.3       | 18               | 38  | 28  | 3      | 1  | 3  | 5  | 2 |
| Helsinki         | Finland         | <b>1.1</b>                          | <b>1.2</b> | <b>1.6</b> | 0.4       | 15               | 55  | 18  | 2      | 1  | 2  | 6  | 1 |
| Jerusalem        | Israel          | <b>1.2</b>                          | <b>1.4</b> | <b>1.8</b> | 0.4       | 8                | 60  | 27  | 1      | 0  | 1  | 3  | 1 |
| Kiev             | Ukraine         | <b>1.1</b>                          | <b>1.2</b> | <b>1.7</b> | 0.7       | 34               | 45  | 10  | 4      | 0  | 1  | 4  | 2 |
| Lisbon           | Portugal        | <b>0.8</b>                          | <b>1.0</b> | <b>1.2</b> | 0.3       | 10               | 48  | 26  | 2      | 1  | 3  | 8  | 2 |
| Ljubljana        | Slovenia        | <b>1.1</b>                          | <b>1.4</b> | <b>1.7</b> | 0.6       | 31               | 45  | 12  | 4      | 1  | 1  | 4  | 2 |
| London           | UK              | <b>0.8</b>                          | <b>0.9</b> | <b>1.1</b> | 0.4       | 18               | 52  | 14  | 4      | 1  | 3  | 6  | 2 |
| Luxemburg        | Luxembourg      | <b>0.9</b>                          | <b>1.1</b> | <b>1.3</b> | 0.5       | 33               | 42  | 10  | 6      | 1  | 1  | 6  | 2 |
| Madrid           | Spain           | <b>1.1</b>                          | <b>1.6</b> | <b>1.9</b> | 0.5       | 13               | 46  | 29  | 2      | 1  | 3  | 4  | 2 |
| Minsk            | Belarus         | <b>1.1</b>                          | <b>1.2</b> | <b>1.5</b> | 0.6       | 37               | 43  | 8   | 4      | 0  | 1  | 4  | 2 |
| Monaco-Ville     | Monaco          | <b>1.1</b>                          | <b>1.4</b> | <b>1.6</b> | 0.5       | 12               | 54  | 20  | 5      | 1  | 2  | 5  | 2 |
| Nicosia          | Cyprus          | <b>1.1</b>                          | <b>1.4</b> | <b>1.8</b> | 0.4       | 3                | 54  | 37  | 1      | 1  | 1  | 3  | 0 |
| Oslo             | Norway          | <b>0.9</b>                          | <b>1.0</b> | <b>1.4</b> | 0.4       | 22               | 48  | 19  | 2      | 1  | 2  | 6  | 1 |
| Paris            | France          | <b>0.9</b>                          | <b>1.1</b> | <b>1.3</b> | 0.5       | 29               | 40  | 11  | 6      | 1  | 3  | 7  | 3 |
| Prague           | Czech Republic  | <b>1.0</b>                          | <b>1.2</b> | <b>1.4</b> | 0.6       | 32               | 45  | 9   | 5      | 1  | 1  | 5  | 3 |
| Rabat            | Morocco         | <b>0.7</b>                          | <b>0.8</b> | <b>1.1</b> | 0.3       | 12               | 44  | 21  | 6      | 1  | 4  | 8  | 3 |
| Riga             | Latvia          | <b>1.0</b>                          | <b>1.1</b> | <b>1.4</b> | 0.5       | 16               | 57  | 14  | 3      | 0  | 1  | 6  | 2 |
| Rome             | Italy           | <b>1.1</b>                          | <b>1.5</b> | <b>1.7</b> | 0.4       | 15               | 46  | 24  | 5      | 1  | 2  | 5  | 2 |
| Saint Helier     | Jersey          | <b>0.7</b>                          | <b>0.9</b> | <b>1.1</b> | 0.4       | 10               | 66  | 14  | 1      | 1  | 3  | 5  | 1 |
| Saint Peter Port | Guernsey and A. | <b>0.7</b>                          | <b>0.8</b> | <b>1.0</b> | 0.3       | 2                | 73  | 15  | 1      | 0  | 3  | 5  | 1 |
| San Marino       | San Marino      | <b>1.1</b>                          | <b>1.5</b> | <b>1.7</b> | 0.6       | 20               | 51  | 16  | 4      | 1  | 2  | 4  | 1 |
| Sarajevo         | Bosnia and H.   | <b>1.2</b>                          | <b>1.5</b> | <b>1.8</b> | 0.6       | 25               | 51  | 16  | 3      | 1  | 1  | 3  | 1 |
| Skopje           | Macedonia       | <b>1.3</b>                          | <b>1.6</b> | <b>2.0</b> | 0.6       | 19               | 55  | 19  | 2      | 0  | 1  | 3  | 1 |
| Sofia            | Bulgaria        | <b>1.2</b>                          | <b>1.6</b> | <b>2.0</b> | 0.6       | 18               | 54  | 20  | 3      | 0  | 1  | 3  | 1 |
| Stockholm        | Sweden          | <b>1.0</b>                          | <b>1.2</b> | <b>1.5</b> | 0.4       | 21               | 52  | 16  | 3      | 1  | 2  | 6  | 1 |
| Tallinn          | Estonia         | <b>1.1</b>                          | <b>1.3</b> | <b>1.6</b> | 0.4       | 11               | 60  | 18  | 2      | 1  | 1  | 6  | 1 |
| Tirana           | Albania         | <b>1.2</b>                          | <b>1.6</b> | <b>1.9</b> | 0.5       | 18               | 47  | 22  | 4      | 1  | 2  | 4  | 1 |
| Torshavn         | Faroe Islands   | <b>0.5</b>                          | <b>0.7</b> | <b>0.9</b> | 0.3       | 5                | 66  | 17  | 1      | 0  | 3  | 7  | 1 |
| Tripoli          | Libya           | <b>1.1</b>                          | <b>1.2</b> | <b>1.7</b> | 0.4       | 6                | 51  | 34  | 2      | 1  | 1  | 4  | 1 |
| Tunis            | Tunisia         | <b>1.1</b>                          | <b>1.3</b> | <b>1.6</b> | 0.4       | 8                | 53  | 29  | 2      | 0  | 2  | 4  | 1 |
| Vaduz            | Liechtenstein   | <b>1.0</b>                          | <b>1.3</b> | <b>1.5</b> | 0.5       | 23               | 45  | 15  | 7      | 1  | 1  | 6  | 2 |
| Valletta         | Malta           | <b>1.1</b>                          | <b>1.3</b> | <b>1.6</b> | 0.3       | 8                | 56  | 29  | 1      | 0  | 1  | 3  | 0 |
| Vatican City     | Vatican City    | <b>1.1</b>                          | <b>1.5</b> | <b>1.7</b> | 0.4       | 15               | 46  | 24  | 5      | 1  | 2  | 5  | 2 |
| Vienna           | Austria         | <b>1.0</b>                          | <b>1.3</b> | <b>1.5</b> | 0.6       | 33               | 45  | 10  | 4      | 1  | 1  | 5  | 2 |
| Vilnius          | Lithuania       | <b>1.1</b>                          | <b>1.2</b> | <b>1.5</b> | 0.6       | 34               | 45  | 9   | 4      | 0  | 1  | 5  | 2 |
| Warsaw           | Poland          | <b>1.0</b>                          | <b>1.2</b> | <b>1.4</b> | 0.6       | 38               | 44  | 7   | 2      | 0  | 1  | 5  | 3 |
| Zagreb           | Croatia         | <b>1.1</b>                          | <b>1.5</b> | <b>1.7</b> | 0.6       | 33               | 43  | 12  | 4      | 1  | 1  | 5  | 2 |



**Table S15.** Absolute changes of mean temperature in summer (JJA) at the end of the century (2071-2099) compared to the period 1981-2010 (see legend of Table S10 for further details).

| Capital city     | Country         | <i>BM<sub>k</sub></i> & <i>BU</i> (°C) |     |     |           | % Total variance |     |     |        |    |    |    |    |
|------------------|-----------------|----------------------------------------|-----|-----|-----------|------------------|-----|-----|--------|----|----|----|----|
|                  |                 | RCP                                    |     |     | <i>BU</i> | Main effects     |     |     | Inter. |    | IV | RV |    |
|                  |                 | 2.6                                    | 4.5 | 8.5 |           | RCM              | GCM | RCP | I1     | I2 |    |    | I3 |
| Amman            | Jordan          | 1.6                                    | 2.8 | 5.0 | 0.8       | 3                | 20  | 74  | 1      | 0  | 1  | 0  | 0  |
| Algiers          | Algeria         | 1.2                                    | 2.1 | 3.6 | 0.7       | 2                | 29  | 67  | 0      | 0  | 1  | 0  | 0  |
| Amsterdam        | Netherlands     | 1.0                                    | 1.7 | 3.0 | 0.8       | 9                | 30  | 56  | 2      | 0  | 1  | 1  | 1  |
| Andorra la Vella | Andorra         | 1.4                                    | 2.8 | 5.1 | 1.1       | 13               | 17  | 64  | 2      | 1  | 2  | 0  | 1  |
| Ankara           | Turkey          | 1.9                                    | 3.2 | 5.7 | 1.1       | 7                | 23  | 67  | 0      | 0  | 1  | 0  | 0  |
| Athens           | Greece          | 1.6                                    | 2.8 | 5.0 | 0.9       | 10               | 19  | 68  | 1      | 0  | 1  | 0  | 1  |
| Bayrut           | Lebanon         | 1.3                                    | 2.1 | 3.7 | 0.6       | 1                | 22  | 75  | 0      | 0  | 1  | 0  | 0  |
| Belgrade         | Serbia and M.   | 1.7                                    | 2.9 | 5.0 | 1.3       | 18               | 22  | 52  | 3      | 1  | 2  | 1  | 1  |
| Berlin           | Germany         | 1.2                                    | 2.0 | 3.5 | 1.0       | 24               | 24  | 45  | 3      | 0  | 2  | 1  | 2  |
| Bern             | Switzerland     | 1.3                                    | 2.4 | 4.3 | 1.3       | 22               | 22  | 48  | 4      | 1  | 1  | 1  | 2  |
| Bratislava       | Slovakia        | 1.5                                    | 2.5 | 4.3 | 1.3       | 25               | 24  | 44  | 2      | 1  | 2  | 1  | 2  |
| Brussels         | Belgium         | 1.0                                    | 1.9 | 3.4 | 0.9       | 17               | 22  | 53  | 3      | 1  | 1  | 1  | 1  |
| Bucharest        | Romania         | 1.7                                    | 3.0 | 5.2 | 1.2       | 16               | 21  | 57  | 2      | 1  | 2  | 0  | 1  |
| Budapest         | Hungary         | 1.6                                    | 2.7 | 4.6 | 1.4       | 27               | 22  | 44  | 2      | 1  | 2  | 1  | 2  |
| Cairo            | Egypt           | 1.6                                    | 2.7 | 4.7 | 0.8       | 2                | 25  | 71  | 1      | 0  | 1  | 0  | 0  |
| Chisinau         | Moldova         | 1.8                                    | 2.8 | 4.9 | 1.3       | 22               | 23  | 49  | 2      | 1  | 2  | 1  | 1  |
| Copenhagen       | Denmark         | 1.2                                    | 2.0 | 3.3 | 0.8       | 13               | 30  | 52  | 1      | 0  | 2  | 1  | 1  |
| Damascus         | Syria           | 1.6                                    | 3.0 | 5.3 | 0.8       | 2                | 18  | 77  | 0      | 0  | 1  | 0  | 0  |
| Douglas          | Isle of Man     | 0.8                                    | 1.5 | 2.7 | 0.7       | 7                | 34  | 54  | 1      | 0  | 2  | 1  | 1  |
| Dublin           | Ireland         | 0.7                                    | 1.5 | 2.8 | 0.7       | 8                | 29  | 59  | 1      | 0  | 1  | 1  | 1  |
| Gibraltar        | Gibraltar       | 0.9                                    | 1.8 | 3.0 | 0.5       | 7                | 12  | 76  | 1      | 0  | 1  | 1  | 1  |
| Helsinki         | Finland         | 1.6                                    | 2.5 | 4.0 | 0.9       | 15               | 26  | 52  | 1      | 1  | 2  | 1  | 2  |
| Jerusalem        | Israel          | 1.5                                    | 2.7 | 4.8 | 0.8       | 4                | 22  | 71  | 1      | 0  | 1  | 0  | 0  |
| Kiev             | Ukraine         | 1.7                                    | 2.6 | 4.5 | 1.3       | 29               | 20  | 43  | 2      | 1  | 2  | 1  | 2  |
| Lisbon           | Portugal        | 0.9                                    | 1.9 | 3.3 | 0.4       | 4                | 9   | 83  | 1      | 0  | 1  | 1  | 1  |
| Ljubljana        | Slovenia        | 1.5                                    | 2.7 | 4.7 | 1.4       | 23               | 24  | 46  | 3      | 1  | 1  | 1  | 2  |
| London           | UK              | 0.9                                    | 1.8 | 3.3 | 0.8       | 13               | 22  | 59  | 2      | 0  | 2  | 1  | 1  |
| Luxemburg        | Luxembourg      | 1.2                                    | 2.1 | 3.8 | 1.1       | 24               | 18  | 50  | 3      | 1  | 1  | 1  | 2  |
| Madrid           | Spain           | 1.4                                    | 3.0 | 5.6 | 1.0       | 8                | 16  | 72  | 1      | 0  | 1  | 0  | 1  |
| Minsk            | Belarus         | 1.7                                    | 2.5 | 4.1 | 1.3       | 34               | 20  | 39  | 2      | 1  | 2  | 1  | 2  |
| Monaco-Ville     | Monaco          | 1.3                                    | 2.6 | 4.6 | 0.9       | 7                | 20  | 67  | 2      | 1  | 1  | 0  | 1  |
| Nicosia          | Cyprus          | 1.5                                    | 2.6 | 4.6 | 0.7       | 1                | 18  | 79  | 0      | 0  | 1  | 0  | 0  |
| Oslo             | Norway          | 1.3                                    | 2.2 | 3.6 | 0.9       | 19               | 23  | 55  | 1      | 0  | 1  | 1  | 1  |
| Paris            | France          | 1.0                                    | 2.0 | 3.8 | 1.0       | 19               | 17  | 56  | 3      | 1  | 2  | 1  | 2  |
| Prague           | Czech Republic  | 1.4                                    | 2.3 | 3.9 | 1.2       | 26               | 26  | 41  | 3      | 1  | 1  | 1  | 2  |
| Rabat            | Morocco         | 0.8                                    | 1.7 | 2.9 | 0.5       | 6                | 10  | 76  | 2      | 1  | 2  | 1  | 2  |
| Riga             | Latvia          | 1.5                                    | 2.3 | 3.8 | 1.0       | 17               | 28  | 48  | 2      | 1  | 2  | 1  | 2  |
| Rome             | Italy           | 1.4                                    | 2.7 | 4.7 | 0.9       | 8                | 16  | 69  | 2      | 0  | 1  | 0  | 1  |
| Saint Helier     | Jersey          | 0.9                                    | 1.7 | 3.0 | 0.6       | 7                | 26  | 64  | 1      | 0  | 1  | 1  | 0  |
| Saint Peter Port | Guernsey and A. | 0.8                                    | 1.6 | 2.8 | 0.6       | 1                | 27  | 69  | 0      | 0  | 1  | 1  | 0  |
| San Marino       | San Marino      | 1.4                                    | 2.8 | 4.9 | 1.3       | 16               | 22  | 56  | 3      | 1  | 2  | 0  | 1  |
| Sarajevo         | Bosnia and H.   | 1.6                                    | 2.8 | 5.0 | 1.4       | 19               | 25  | 51  | 2      | 0  | 1  | 0  | 1  |
| Skopje           | Macedonia       | 1.7                                    | 3.1 | 5.5 | 1.3       | 11               | 25  | 60  | 1      | 0  | 1  | 0  | 1  |
| Sofia            | Bulgaria        | 1.7                                    | 3.1 | 5.4 | 1.3       | 12               | 25  | 59  | 1      | 0  | 1  | 0  | 1  |
| Stockholm        | Sweden          | 1.4                                    | 2.3 | 3.7 | 0.9       | 16               | 26  | 52  | 2      | 0  | 2  | 1  | 1  |
| Tallinn          | Estonia         | 1.6                                    | 2.5 | 3.9 | 0.9       | 12               | 30  | 51  | 1      | 1  | 2  | 1  | 1  |
| Tirana           | Albania         | 1.6                                    | 3.0 | 5.3 | 1.1       | 12               | 18  | 64  | 2      | 1  | 1  | 0  | 1  |
| Torshavn         | Faroe Islands   | 0.5                                    | 1.4 | 2.2 | 0.6       | 2                | 34  | 59  | 1      | 0  | 2  | 1  | 1  |
| Tripoli          | Libya           | 1.5                                    | 2.5 | 4.5 | 0.8       | 2                | 22  | 72  | 1      | 0  | 2  | 0  | 1  |
| Tunis            | Tunisia         | 1.4                                    | 2.5 | 4.4 | 0.8       | 4                | 20  | 73  | 1      | 0  | 1  | 0  | 1  |
| Vaduz            | Liechtenstein   | 1.4                                    | 2.5 | 4.4 | 1.2       | 19               | 22  | 51  | 4      | 1  | 1  | 1  | 2  |
| Valletta         | Malta           | 1.5                                    | 2.5 | 4.3 | 0.7       | 4                | 23  | 71  | 1      | 0  | 1  | 0  | 0  |
| Vatican City     | Vatican City    | 1.4                                    | 2.7 | 4.7 | 0.9       | 8                | 16  | 69  | 2      | 0  | 1  | 0  | 1  |
| Vienna           | Austria         | 1.4                                    | 2.4 | 4.2 | 1.3       | 25               | 25  | 44  | 3      | 1  | 1  | 1  | 2  |
| Vilnius          | Lithuania       | 1.6                                    | 2.4 | 4.0 | 1.2       | 30               | 24  | 39  | 2      | 1  | 2  | 1  | 2  |
| Warsaw           | Poland          | 1.5                                    | 2.4 | 3.9 | 1.3       | 31               | 24  | 38  | 2      | 1  | 2  | 1  | 2  |
| Zagreb           | Croatia         | 1.5                                    | 2.7 | 4.8 | 1.4       | 23               | 20  | 49  | 3      | 1  | 1  | 1  | 2  |

**Table S16.** Relative changes of total precipitation in summer (JJA) in the near future (2021-2050) compared to the period 1981-2010 (see legend of Table S10 for further details).

| Capital city     | Country         | $BM_k$ & $BU$ (%) |     |     |      | % Total variance |     |     |        |    |    |    |    |
|------------------|-----------------|-------------------|-----|-----|------|------------------|-----|-----|--------|----|----|----|----|
|                  |                 | RCP               |     |     | $BU$ | Main effects     |     |     | Inter. |    |    |    |    |
|                  |                 | 2.6               | 4.5 | 8.5 |      | RCM              | GCM | RCP | I1     | I2 | I3 | IV | RV |
| Amman            | Jordan          | -16               | -18 | -13 | 43   | 11               | 23  | 0   | 9      | 1  | 3  | 49 | 6  |
| Algiers          | Algeria         | 2                 | 3   | -4  | 21   | 8                | 33  | 2   | 13     | 3  | 5  | 30 | 6  |
| Amsterdam        | Netherlands     | -1                | -2  | -2  | 8    | 31               | 17  | 0   | 14     | 3  | 3  | 22 | 9  |
| Andorra la Vella | Andorra         | -1                | -7  | -8  | 8    | 12               | 33  | 12  | 9      | 4  | 6  | 19 | 6  |
| Ankara           | Turkey          | -8                | -12 | -13 | 14   | 17               | 23  | 3   | 13     | 2  | 7  | 29 | 6  |
| Athens           | Greece          | -3                | -6  | -17 | 19   | 15               | 17  | 9   | 12     | 3  | 7  | 32 | 6  |
| Bayrut           | Lebanon         | -4                | -7  | -13 | 38   | 4                | 22  | 1   | 14     | 1  | 6  | 41 | 11 |
| Belgrade         | Serbia and M.   | -1                | -5  | -7  | 10   | 21               | 26  | 5   | 10     | 1  | 5  | 25 | 7  |
| Berlin           | Germany         | -0                | 0   | 1   | 9    | 28               | 25  | 0   | 6      | 3  | 3  | 22 | 13 |
| Bern             | Switzerland     | -1                | -3  | -5  | 8    | 25               | 41  | 3   | 11     | 2  | 2  | 13 | 3  |
| Bratislava       | Slovakia        | -0                | -2  | 0   | 8    | 17               | 29  | 1   | 8      | 2  | 4  | 31 | 8  |
| Brussels         | Belgium         | -4                | -5  | -6  | 8    | 32               | 29  | 1   | 11     | 2  | 1  | 17 | 5  |
| Bucharest        | Romania         | -2                | -6  | -7  | 12   | 6                | 41  | 4   | 11     | 1  | 4  | 24 | 7  |
| Budapest         | Hungary         | -1                | -3  | -2  | 9    | 19               | 27  | 1   | 11     | 3  | 3  | 30 | 7  |
| Cairo            | Egypt           | -17               | -8  | -20 | 108  | 7                | 13  | 0   | 13     | 1  | 8  | 44 | 13 |
| Chisinau         | Moldova         | -1                | -5  | -6  | 9    | 14               | 30  | 5   | 7      | 3  | 3  | 33 | 4  |
| Copenhagen       | Denmark         | -1                | 1   | 1   | 9    | 26               | 36  | 1   | 6      | 1  | 4  | 20 | 5  |
| Damascus         | Syria           | 2                 | -24 | 0   | 139  | 7                | 3   | 1   | 9      | 3  | 4  | 55 | 18 |
| Douglas          | Isle of Man     | -2                | -2  | -5  | 7    | 40               | 16  | 4   | 10     | 2  | 5  | 17 | 5  |
| Dublin           | Ireland         | -4                | -3  | -6  | 6    | 20               | 22  | 4   | 10     | 1  | 8  | 27 | 8  |
| Gibraltar        | Gibraltar       | 5                 | -3  | -9  | 21   | 26               | 14  | 7   | 7      | 3  | 5  | 33 | 6  |
| Helsinki         | Finland         | 1                 | 6   | 7   | 9    | 24               | 30  | 7   | 5      | 1  | 6  | 21 | 6  |
| Jerusalem        | Israel          | -18               | -19 | -13 | 42   | 17               | 19  | 0   | 9      | 1  | 7  | 39 | 7  |
| Kiev             | Ukraine         | -1                | -2  | -2  | 11   | 19               | 37  | 0   | 13     | 1  | 2  | 24 | 4  |
| Lisbon           | Portugal        | -6                | -18 | -24 | 14   | 10               | 12  | 22  | 6      | 4  | 8  | 33 | 5  |
| Ljubljana        | Slovenia        | -2                | -5  | -5  | 9    | 25               | 33  | 2   | 7      | 1  | 4  | 22 | 7  |
| London           | UK              | -1                | -3  | -4  | 8    | 32               | 23  | 3   | 10     | 1  | 5  | 22 | 5  |
| Luxemburg        | Luxembourg      | -4                | -4  | -6  | 7    | 22               | 30  | 1   | 12     | 2  | 4  | 22 | 7  |
| Madrid           | Spain           | -2                | -7  | -12 | 14   | 17               | 40  | 8   | 6      | 1  | 2  | 22 | 4  |
| Minsk            | Belarus         | -3                | 1   | 1   | 9    | 12               | 35  | 3   | 13     | 1  | 3  | 23 | 9  |
| Monaco-Ville     | Monaco          | -0                | -8  | -8  | 14   | 19               | 31  | 7   | 10     | 2  | 5  | 21 | 5  |
| Nicosia          | Cyprus          | -6                | -21 | -11 | 44   | 4                | 20  | 2   | 9      | 1  | 3  | 49 | 11 |
| Oslo             | Norway          | -1                | 1   | 1   | 9    | 43               | 25  | 1   | 4      | 1  | 3  | 19 | 4  |
| Paris            | France          | -4                | -5  | -7  | 8    | 36               | 20  | 2   | 9      | 3  | 2  | 21 | 7  |
| Prague           | Czech Republic  | 1                 | 1   | 2   | 8    | 19               | 27  | 0   | 12     | 2  | 3  | 26 | 12 |
| Rabat            | Morocco         | 1                 | 0   | -3  | 26   | 6                | 42  | 0   | 5      | 0  | 3  | 41 | 3  |
| Riga             | Latvia          | 2                 | 4   | 5   | 9    | 26               | 32  | 2   | 7      | 1  | 4  | 20 | 8  |
| Rome             | Italy           | -0                | -10 | -12 | 15   | 20               | 30  | 10  | 9      | 1  | 6  | 18 | 5  |
| Saint Helier     | Jersey          | -2                | -4  | -6  | 8    | 26               | 14  | 5   | 17     | 2  | 4  | 24 | 8  |
| Saint Peter Port | Guernsey and A. | -1                | -3  | -6  | 8    | 30               | 12  | 6   | 13     | 3  | 5  | 25 | 7  |
| San Marino       | San Marino      | 1                 | -5  | -6  | 14   | 17               | 39  | 4   | 11     | 2  | 6  | 16 | 6  |
| Sarajevo         | Bosnia and H.   | -2                | -7  | -9  | 10   | 22               | 25  | 7   | 11     | 1  | 5  | 22 | 6  |
| Skopje           | Macedonia       | -4                | -9  | -11 | 14   | 22               | 21  | 5   | 10     | 1  | 4  | 28 | 10 |
| Sofia            | Bulgaria        | -4                | -8  | -11 | 10   | 13               | 34  | 8   | 9      | 1  | 6  | 21 | 8  |
| Stockholm        | Sweden          | 1                 | 2   | 3   | 9    | 27               | 32  | 1   | 7      | 1  | 6  | 20 | 6  |
| Tallinn          | Estonia         | 1                 | 5   | 6   | 9    | 23               | 31  | 6   | 8      | 1  | 4  | 19 | 8  |
| Tirana           | Albania         | -2                | -11 | -13 | 13   | 16               | 25  | 11  | 15     | 3  | 8  | 18 | 5  |
| Torshavn         | Faroe Islands   | -0                | 1   | -1  | 6    | 36               | 28  | 3   | 7      | 2  | 2  | 18 | 3  |
| Tripoli          | Libya           | 7                 | -4  | -13 | 27   | 17               | 6   | 9   | 14     | 6  | 3  | 38 | 8  |
| Tunis            | Tunisia         | -3                | -13 | -16 | 19   | 19               | 28  | 8   | 10     | 2  | 5  | 25 | 3  |
| Vaduz            | Liechtenstein   | -2                | -3  | -3  | 8    | 23               | 40  | 1   | 13     | 2  | 3  | 14 | 5  |
| Valletta         | Malta           | 2                 | -9  | -12 | 24   | 12               | 20  | 6   | 12     | 2  | 3  | 41 | 5  |
| Vatican City     | Vatican City    | -0                | -10 | -12 | 15   | 20               | 30  | 10  | 9      | 1  | 6  | 18 | 5  |
| Vienna           | Austria         | -1                | 0   | 1   | 8    | 13               | 35  | 1   | 10     | 3  | 2  | 32 | 5  |
| Vilnius          | Lithuania       | -1                | 0   | 1   | 8    | 20               | 32  | 1   | 12     | 2  | 4  | 20 | 8  |
| Warsaw           | Poland          | 0                 | 1   | 2   | 9    | 27               | 32  | 1   | 9      | 1  | 2  | 20 | 8  |
| Zagreb           | Croatia         | -3                | -5  | -6  | 9    | 20               | 34  | 2   | 8      | 1  | 4  | 26 | 5  |

**Table S17.** Relative changes of total precipitation in summer (JJA) at the end of the century (2071-2099) compared to the period 1981-2010 (see legend of Table S10 for further details).

| Capital city     | Country         | <i>BM<sub>k</sub></i> & <i>BU</i> (%) |            |            |           | % Total variance |     |     |        |    |    |    |    |
|------------------|-----------------|---------------------------------------|------------|------------|-----------|------------------|-----|-----|--------|----|----|----|----|
|                  |                 | RCP                                   |            |            | <i>BU</i> | Main effects     |     |     | Inter. |    |    | IV | RV |
|                  |                 | 2.6                                   | 4.5        | 8.5        |           | RCM              | GCM | RCP | I1     | I2 | I3 |    |    |
| Amman            | Jordan          | -24                                   | -5         | -24        | 85        | 6                | 33  | 1   | 25     | 2  | 5  | 12 | 15 |
| Algiers          | Algeria         | 5                                     | 8          | -16        | 40        | 10               | 43  | 7   | 11     | 4  | 10 | 8  | 7  |
| Amsterdam        | Netherlands     | -1                                    | -4         | -9         | 16        | 44               | 17  | 3   | 10     | 3  | 5  | 5  | 13 |
| Andorra la Vella | Andorra         | -5                                    | -13        | <b>-25</b> | 16        | 16               | 35  | 20  | 8      | 4  | 6  | 4  | 6  |
| Ankara           | Turkey          | -14                                   | -20        | <b>-33</b> | 25        | 10               | 37  | 9   | 14     | 3  | 10 | 8  | 9  |
| Athens           | Greece          | 2                                     | -8         | <b>-40</b> | 31        | 9                | 15  | 25  | 7      | 10 | 11 | 10 | 13 |
| Bayrut           | Lebanon         | -24                                   | -3         | -32        | 67        | 8                | 35  | 3   | 20     | 3  | 6  | 13 | 12 |
| Belgrade         | Serbia and M.   | -1                                    | -9         | -17        | 18        | 26               | 23  | 11  | 11     | 3  | 7  | 7  | 10 |
| Berlin           | Germany         | -1                                    | 0          | 1          | 19        | 31               | 37  | 0   | 6      | 2  | 6  | 5  | 13 |
| Bern             | Switzerland     | -0                                    | -5         | -12        | 17        | 30               | 39  | 8   | 11     | 2  | 4  | 3  | 4  |
| Bratislava       | Slovakia        | 2                                     | -3         | -1         | 17        | 21               | 39  | 1   | 13     | 2  | 6  | 8  | 10 |
| Brussels         | Belgium         | -4                                    | -10        | -14        | 18        | 39               | 30  | 5   | 9      | 3  | 2  | 4  | 8  |
| Bucharest        | Romania         | -2                                    | -11        | -17        | 20        | 12               | 38  | 9   | 11     | 3  | 6  | 8  | 13 |
| Budapest         | Hungary         | 0                                     | -5         | -7         | 18        | 20               | 31  | 3   | 14     | 3  | 9  | 8  | 13 |
| Cairo            | Egypt           | -9                                    | -1         | -35        | 242       | 9                | 19  | 0   | 19     | 3  | 16 | 9  | 25 |
| Chisinau         | Moldova         | -4                                    | -8         | -15        | 18        | 13               | 46  | 6   | 8      | 4  | 4  | 9  | 9  |
| Copenhagen       | Denmark         | -2                                    | 2          | 1          | 19        | 29               | 42  | 0   | 9      | 2  | 5  | 5  | 8  |
| Damascus         | Syria           | 35                                    | 2          | 44         | 392       | 14               | 6   | 0   | 16     | 7  | 7  | 7  | 43 |
| Douglas          | Isle of Man     | -1                                    | -3         | -12        | 14        | 45               | 12  | 10  | 10     | 5  | 6  | 5  | 7  |
| Dublin           | Ireland         | -6                                    | -8         | <b>-14</b> | 11        | 23               | 25  | 9   | 13     | 2  | 10 | 7  | 11 |
| Gibraltar        | Gibraltar       | 6                                     | -16        | -30        | 37        | 19               | 22  | 14  | 6      | 6  | 13 | 10 | 9  |
| Helsinki         | Finland         | 1                                     | 11         | 15         | 19        | 31               | 34  | 9   | 4      | 1  | 7  | 5  | 8  |
| Jerusalem        | Israel          | -33                                   | -12        | -20        | 73        | 16               | 37  | 1   | 8      | 2  | 10 | 13 | 12 |
| Kiev             | Ukraine         | -2                                    | -6         | -6         | 20        | 25               | 41  | 1   | 15     | 2  | 4  | 7  | 5  |
| Lisbon           | Portugal        | -11                                   | <b>-36</b> | <b>-58</b> | 22        | 11               | 17  | 43  | 4      | 3  | 6  | 10 | 7  |
| Ljubljana        | Slovenia        | -3                                    | -8         | -16        | 19        | 35               | 29  | 8   | 9      | 2  | 6  | 5  | 8  |
| London           | UK              | -1                                    | -8         | -12        | 15        | 42               | 22  | 9   | 8      | 2  | 5  | 6  | 7  |
| Luxemburg        | Luxembourg      | -8                                    | -11        | -16        | 16        | 29               | 40  | 3   | 8      | 4  | 4  | 4  | 7  |
| Madrid           | Spain           | -6                                    | -16        | <b>-34</b> | 25        | 18               | 44  | 18  | 7      | 1  | 2  | 7  | 4  |
| Minsk            | Belarus         | -6                                    | -1         | -1         | 18        | 24               | 40  | 2   | 13     | 2  | 4  | 6  | 9  |
| Monaco-Ville     | Monaco          | 4                                     | -17        | -24        | 27        | 26               | 23  | 17  | 11     | 2  | 7  | 5  | 8  |
| Nicosia          | Cyprus          | -7                                    | -40        | -24        | 101       | 8                | 19  | 2   | 14     | 6  | 8  | 9  | 34 |
| Oslo             | Norway          | -2                                    | 1          | 2          | 18        | 49               | 30  | 1   | 5      | 2  | 4  | 4  | 6  |
| Paris            | France          | -6                                    | -12        | <b>-19</b> | 17        | 39               | 25  | 9   | 8      | 4  | 3  | 4  | 8  |
| Prague           | Czech Republic  | 1                                     | 1          | 1          | 15        | 26               | 35  | 0   | 12     | 2  | 5  | 6  | 14 |
| Rabat            | Morocco         | 2                                     | 1          | -17        | 38        | 10               | 41  | 5   | 4      | 4  | 8  | 19 | 10 |
| Riga             | Latvia          | 1                                     | 5          | 8          | 18        | 28               | 45  | 3   | 7      | 1  | 4  | 5  | 8  |
| Rome             | Italy           | 5                                     | -16        | <b>-30</b> | 29        | 25               | 25  | 20  | 10     | 3  | 7  | 4  | 7  |
| Saint Helier     | Jersey          | -1                                    | -9         | <b>-20</b> | 17        | 30               | 20  | 16  | 12     | 2  | 5  | 5  | 10 |
| Saint Peter Port | Guernsey and A. | 0                                     | -6         | <b>-18</b> | 17        | 32               | 18  | 18  | 11     | 3  | 4  | 5  | 8  |
| San Marino       | San Marino      | 4                                     | -6         | -17        | 26        | 23               | 31  | 9   | 13     | 4  | 7  | 4  | 9  |
| Sarajevo         | Bosnia and H.   | -3                                    | -13        | <b>-22</b> | 19        | 28               | 23  | 14  | 12     | 2  | 6  | 5  | 9  |
| Skopje           | Macedonia       | -6                                    | -13        | <b>-25</b> | 23        | 30               | 17  | 10  | 13     | 2  | 5  | 10 | 12 |
| Sofia            | Bulgaria        | -7                                    | <b>-19</b> | <b>-27</b> | 18        | 13               | 37  | 17  | 9      | 1  | 6  | 6  | 11 |
| Stockholm        | Sweden          | 2                                     | 5          | 6          | 18        | 35               | 35  | 1   | 7      | 1  | 6  | 5  | 9  |
| Tallinn          | Estonia         | -2                                    | 6          | 12         | 21        | 27               | 40  | 6   | 7      | 1  | 5  | 4  | 10 |
| Tirana           | Albania         | -1                                    | -21        | <b>-34</b> | 25        | 20               | 18  | 22  | 15     | 3  | 10 | 4  | 7  |
| Torshavn         | Faroe Islands   | -2                                    | 2          | -3         | 12        | 42               | 33  | 4   | 6      | 2  | 3  | 5  | 5  |
| Tripoli          | Libya           | 17                                    | -14        | -44        | 44        | 19               | 4   | 24  | 14     | 10 | 6  | 12 | 11 |
| Tunis            | Tunisia         | -6                                    | -22        | <b>-40</b> | 33        | 21               | 26  | 14  | 12     | 2  | 10 | 8  | 7  |
| Vaduz            | Liechtenstein   | -3                                    | -5         | -10        | 17        | 28               | 43  | 3   | 12     | 3  | 3  | 3  | 5  |
| Valletta         | Malta           | 10                                    | -16        | -30        | 39        | 13               | 19  | 16  | 14     | 6  | 6  | 13 | 14 |
| Vatican City     | Vatican City    | 5                                     | -16        | <b>-30</b> | 29        | 25               | 25  | 20  | 10     | 3  | 7  | 4  | 7  |
| Vienna           | Austria         | 1                                     | 0          | -1         | 15        | 19               | 44  | 0   | 12     | 4  | 3  | 9  | 9  |
| Vilnius          | Lithuania       | -5                                    | -1         | 0          | 18        | 27               | 43  | 1   | 10     | 2  | 5  | 5  | 7  |
| Warsaw           | Poland          | 2                                     | 0          | 2          | 20        | 30               | 43  | 0   | 10     | 1  | 3  | 4  | 9  |
| Zagreb           | Croatia         | -4                                    | -8         | -16        | 17        | 30               | 34  | 7   | 7      | 2  | 7  | 6  | 6  |

## 6 Differences between “balanced” and direct estimates of mean projected changes

**Table S18.** Difference between “balanced” estimates  $BM_k$  of mean expected change response (in °C), and corresponding direct estimates  $M_k$  for the three regions taken from the IPCC SREX report (Seneviratne et al., 2012), for absolute changes of mean temperature in winter (DJF) and summer (JJA) at the end of the century (2071-2099) compared to the period 1981-2010.

| Season  | DJF          |      |      | JJA          |     |      |
|---------|--------------|------|------|--------------|-----|------|
| Country | $BM_k - M_k$ |      |      | $BM_k - M_k$ |     |      |
|         | 2.6          | 4.5  | 8.5  | 2.6          | 4.5 | 8.5  |
| NEU     | -0.1         | -0.2 | -0.3 | 0.1          | 0.1 | -0.1 |
| CEU     | -0.2         | -0.2 | -0.4 | 0.5          | 0.5 | 0.2  |
| MED     | 0.1          | -0.1 | -0.2 | 0.2          | 0.3 | -0.0 |

**Table S19.** Difference between “balanced” estimates  $BM_k$  of mean expected change response (in %), and corresponding direct estimates  $M_k$  for the three regions taken from the IPCC SREX report (Seneviratne et al., 2012), for relative changes of total precipitation in winter (DJF) and summer (JJA) at the end of the century (2071-2099) compared to the period 1981-2010.

| Season  | DJF          |     |     | JJA          |     |     |
|---------|--------------|-----|-----|--------------|-----|-----|
| Country | $BM_k - M_k$ |     |     | $BM_k - M_k$ |     |     |
|         | 2.6          | 4.5 | 8.5 | 2.6          | 4.5 | 8.5 |
| NEU     | -0           | -2  | -2  | -2           | -4  | -3  |
| CEU     | 0            | -2  | -2  | -4           | -9  | -4  |
| MED     | -0           | -3  | 1   | -4           | -7  | -3  |

**Table S20.** Difference between “balanced” estimates  $BM_k$  of mean expected change response (in °C), and corresponding direct estimates  $M_k$  for the countries of the domain, for absolute changes of mean temperature in winter (DJF) and summer (JJA) at the end of the century (2071-2099) compared to the period 1981-2010.

| Season        | DJF          |      |      | JJA          |     |      |
|---------------|--------------|------|------|--------------|-----|------|
|               | $BM_k - M_k$ |      |      | $BM_k - M_k$ |     |      |
| Country       | 2.6          | 4.5  | 8.5  | 2.6          | 4.5 | 8.5  |
| Algeria       | 0.1          | -0.1 | -0.2 | 0.2          | 0.1 | -0.0 |
| Albania       | 0.1          | -0.1 | -0.2 | 0.3          | 0.4 | 0.1  |
| Bosnia and H. | 0.0          | -0.1 | -0.3 | 0.5          | 0.6 | 0.2  |
| Bulgaria      | 0.1          | -0.1 | -0.2 | 0.5          | 0.5 | 0.2  |
| Cyprus        | 0.1          | -0.1 | -0.1 | 0.1          | 0.1 | -0.1 |
| Denmark       | -0.1         | -0.2 | -0.4 | 0.2          | 0.3 | -0.1 |
| Ireland       | -0.1         | -0.3 | -0.3 | 0.1          | 0.0 | -0.1 |
| Estonia       | -0.4         | -0.2 | -0.5 | 0.4          | 0.3 | 0.0  |
| Austria       | -0.1         | -0.2 | -0.4 | 0.4          | 0.5 | 0.1  |
| Czech Rep.    | -0.1         | -0.2 | -0.4 | 0.4          | 0.6 | 0.2  |
| Finland       | -0.2         | -0.1 | -0.3 | 0.3          | 0.3 | -0.0 |
| France        | -0.1         | -0.2 | -0.4 | 0.2          | 0.3 | 0.0  |
| Germany       | -0.1         | -0.2 | -0.5 | 0.3          | 0.4 | 0.1  |
| Greece        | 0.1          | -0.1 | -0.2 | 0.3          | 0.4 | 0.1  |
| Croatia       | 0.0          | -0.1 | -0.3 | 0.5          | 0.6 | 0.2  |
| Hungary       | -0.0         | -0.1 | -0.3 | 0.6          | 0.7 | 0.2  |
| Israel        | 0.2          | -0.2 | -0.1 | 0.3          | 0.3 | -0.0 |
| Italy         | 0.0          | -0.1 | -0.3 | 0.3          | 0.4 | 0.1  |
| Jordan        | 0.2          | -0.1 | -0.1 | 0.3          | 0.3 | -0.0 |
| Lebanon       | 0.2          | -0.2 | -0.1 | 0.3          | 0.3 | -0.0 |
| Latvia        | -0.4         | -0.2 | -0.5 | 0.5          | 0.4 | 0.1  |
| Belarus       | -0.4         | -0.2 | -0.5 | 0.6          | 0.6 | 0.2  |
| Lithuania     | -0.4         | -0.2 | -0.5 | 0.5          | 0.4 | 0.1  |
| Slovakia      | -0.1         | -0.3 | -0.4 | 0.6          | 0.7 | 0.3  |
| Macedonia     | 0.1          | -0.2 | -0.2 | 0.4          | 0.5 | 0.2  |
| Morocco       | -0.0         | -0.2 | -0.2 | 0.1          | 0.1 | -0.2 |
| Netherlands   | -0.1         | -0.3 | -0.4 | 0.2          | 0.2 | -0.1 |
| Norway        | -0.1         | -0.2 | -0.3 | 0.3          | 0.2 | -0.1 |
| Poland        | -0.3         | -0.3 | -0.5 | 0.5          | 0.6 | 0.2  |
| Portugal      | -0.0         | -0.1 | -0.3 | -0.1         | 0.2 | -0.1 |
| Romania       | -0.0         | -0.1 | -0.3 | 0.6          | 0.7 | 0.3  |
| Moldova       | -0.1         | -0.1 | -0.3 | 0.6          | 0.7 | 0.3  |
| Slovenia      | -0.1         | -0.2 | -0.4 | 0.5          | 0.6 | 0.2  |
| Spain         | -0.0         | -0.1 | -0.3 | 0.1          | 0.2 | -0.1 |
| Sweden        | -0.3         | -0.3 | -0.4 | 0.3          | 0.2 | -0.0 |
| Switzerland   | -0.1         | -0.2 | -0.4 | 0.3          | 0.3 | 0.1  |
| Tunisia       | 0.0          | -0.1 | -0.2 | 0.2          | 0.1 | -0.0 |
| Turkey        | 0.2          | -0.2 | -0.1 | 0.3          | 0.4 | 0.1  |
| UK            | -0.1         | -0.3 | -0.4 | 0.1          | 0.1 | -0.1 |
| Ukraine       | -0.1         | -0.1 | -0.3 | 0.6          | 0.6 | 0.3  |

**Table S21.** Difference between “balanced” estimates  $BM_k$  of mean expected change response (in %), and corresponding direct estimates  $M_k$  for the countries of the domain, for relative changes of total precipitation in winter (DJF) and summer (JJA) at the end of the century (2071-2099) compared to the period 1981-2010.

| Season        | DJF          |     |     | JJA          |     |     |
|---------------|--------------|-----|-----|--------------|-----|-----|
|               | $BM_k - M_k$ |     |     | $BM_k - M_k$ |     |     |
| Country       | 2.6          | 4.5 | 8.5 | 2.6          | 4.5 | 8.5 |
| Algeria       | 2            | 2   | 6   | -9           | -4  | -2  |
| Albania       | 2            | 0   | 3   | -3           | -6  | -3  |
| Bosnia and H. | 1            | -0  | 3   | -4           | -8  | -2  |
| Bulgaria      | 3            | -1  | 4   | -4           | -8  | -6  |
| Cyprus        | -5           | -5  | -1  | -4           | -16 | -8  |
| Denmark       | -1           | -2  | -3  | -1           | -6  | -5  |
| Ireland       | -3           | -3  | -2  | -1           | -5  | -4  |
| Estonia       | -2           | -2  | -3  | -5           | -9  | -5  |
| Austria       | -1           | -4  | -2  | -1           | -5  | 0   |
| Czech Rep.    | -1           | -2  | -2  | -2           | -6  | -2  |
| Finland       | 1            | -3  | -2  | -2           | -4  | -3  |
| France        | 1            | -2  | -0  | -3           | -6  | -4  |
| Germany       | 1            | -1  | -2  | -3           | -8  | -4  |
| Greece        | 2            | -0  | 5   | -4           | -4  | -5  |
| Croatia       | 1            | -0  | 2   | -3           | -8  | -2  |
| Hungary       | -0           | -3  | -1  | -3           | -11 | -2  |
| Israel        | -9           | -2  | 0   | -10          | -39 | -13 |
| Italy         | 1            | -5  | 3   | -1           | -7  | -2  |
| Jordan        | -6           | -1  | 2   | -24          | 11  | -15 |
| Lebanon       | -8           | -3  | -0  | -7           | -15 | -7  |
| Latvia        | -1           | -2  | -3  | -4           | -9  | -6  |
| Belarus       | -1           | -2  | -3  | -7           | -13 | -6  |
| Lithuania     | -1           | -1  | -3  | -5           | -10 | -7  |
| Slovakia      | -1           | -4  | -1  | -4           | -10 | -3  |
| Macedonia     | 3            | -1  | 5   | -4           | -5  | -3  |
| Morocco       | -1           | -5  | 2   | -5           | 7   | 4   |
| Netherlands   | 0            | -2  | -2  | -3           | -8  | -5  |
| Norway        | -2           | -4  | -4  | -2           | -3  | -1  |
| Poland        | -2           | -2  | -3  | -3           | -10 | -6  |
| Portugal      | -1           | -8  | -4  | -1           | -6  | -1  |
| Romania       | 1            | -1  | 1   | -4           | -10 | -5  |
| Moldova       | -2           | -7  | 1   | -5           | -13 | -6  |
| Slovenia      | 1            | -3  | 1   | -2           | -8  | -1  |
| Spain         | -1           | -8  | -3  | -4           | -5  | -0  |
| Sweden        | -1           | -5  | -3  | -0           | -4  | -2  |
| Switzerland   | 1            | -1  | -1  | -1           | -7  | -3  |
| Tunisia       | -1           | -4  | 2   | -7           | -10 | -6  |
| Turkey        | -1           | -3  | 0   | -4           | -9  | -4  |
| UK            | -2           | -3  | -2  | 0            | -4  | -3  |
| Ukraine       | -1           | -3  | -1  | -6           | -13 | -6  |

**Table S22.** Difference between “balanced” estimates  $BM_k$  of mean expected change response (in °C), and corresponding direct estimates  $M_k$  for the capital cities of the domain, for absolute changes of mean temperature in winter (DJF) and summer (JJA) at the end of the century (2071-2099) compared to the period 1981-2010.

| Season           |                 | DJF          |      |      | JJA          |      |      |
|------------------|-----------------|--------------|------|------|--------------|------|------|
| Capital city     | Country         | $BM_k - M_k$ |      |      | $BM_k - M_k$ |      |      |
|                  |                 | 2.6          | 4.5  | 8.5  | 2.6          | 4.5  | 8.5  |
| Amman            | Jordan          | 0.3          | -0.1 | -0.0 | 0.3          | 0.4  | 0.1  |
| Algiers          | Algeria         | 0.0          | -0.1 | -0.2 | 0.2          | 0.2  | -0.1 |
| Amsterdam        | Netherlands     | -0.1         | -0.3 | -0.4 | 0.2          | 0.2  | -0.0 |
| Andorra la Vella | Andorra         | -0.3         | -0.4 | -0.5 | 0.2          | 0.2  | 0.1  |
| Ankara           | Turkey          | 0.1          | -0.3 | -0.1 | 0.5          | 0.6  | 0.3  |
| Athens           | Greece          | 0.1          | -0.1 | -0.1 | 0.4          | 0.3  | 0.1  |
| Bayrut           | Lebanon         | 0.1          | -0.1 | -0.1 | 0.1          | 0.2  | -0.1 |
| Belgrade         | Serbia and M.   | 0.1          | -0.0 | -0.2 | 0.6          | 0.7  | 0.4  |
| Berlin           | Germany         | -0.2         | -0.2 | -0.4 | 0.4          | 0.5  | 0.1  |
| Bern             | Switzerland     | -0.0         | -0.2 | -0.4 | 0.3          | 0.4  | 0.2  |
| Bratislava       | Slovakia        | -0.0         | -0.1 | -0.3 | 0.5          | 0.7  | 0.2  |
| Brussels         | Belgium         | -0.1         | -0.3 | -0.4 | 0.2          | 0.3  | 0.1  |
| Bucharest        | Romania         | 0.0          | -0.1 | -0.2 | 0.5          | 0.6  | 0.3  |
| Budapest         | Hungary         | 0.0          | -0.1 | -0.3 | 0.6          | 0.7  | 0.3  |
| Cairo            | Egypt           | 0.1          | -0.2 | -0.1 | 0.4          | 0.4  | 0.1  |
| Chisinau         | Moldova         | -0.1         | -0.1 | -0.3 | 0.6          | 0.7  | 0.3  |
| Copenhagen       | Denmark         | -0.1         | -0.1 | -0.3 | 0.2          | 0.3  | -0.0 |
| Damascus         | Syria           | 0.2          | -0.1 | -0.0 | 0.2          | 0.3  | 0.0  |
| Douglas          | Isle of Man     | -0.1         | -0.3 | -0.3 | 0.1          | 0.1  | -0.1 |
| Dublin           | Ireland         | -0.1         | -0.3 | -0.3 | 0.0          | 0.1  | -0.1 |
| Gibraltar        | Gibraltar       | -0.0         | -0.1 | -0.2 | 0.1          | 0.2  | -0.0 |
| Helsinki         | Finland         | -0.4         | -0.1 | -0.4 | 0.3          | 0.3  | 0.0  |
| Jerusalem        | Israel          | 0.2          | -0.1 | -0.0 | 0.3          | 0.4  | 0.1  |
| Kiev             | Ukraine         | -0.2         | -0.2 | -0.3 | 0.6          | 0.6  | 0.3  |
| Lisbon           | Portugal        | 0.0          | -0.1 | -0.2 | -0.0         | 0.1  | -0.1 |
| Ljubljana        | Slovenia        | -0.0         | -0.1 | -0.3 | 0.5          | 0.6  | 0.3  |
| London           | UK              | -0.1         | -0.3 | -0.4 | 0.1          | 0.2  | -0.0 |
| Luxemburg        | Luxembourg      | -0.1         | -0.3 | -0.4 | 0.3          | 0.5  | 0.2  |
| Madrid           | Spain           | 0.0          | -0.0 | -0.2 | 0.2          | 0.3  | 0.0  |
| Minsk            | Belarus         | -0.3         | -0.2 | -0.4 | 0.7          | 0.6  | 0.3  |
| Monaco-Ville     | Monaco          | 0.1          | -0.1 | -0.2 | 0.2          | 0.4  | 0.1  |
| Nicosia          | Cyprus          | 0.1          | -0.1 | -0.1 | 0.1          | 0.2  | -0.1 |
| Oslo             | Norway          | -0.3         | -0.4 | -0.5 | 0.3          | 0.3  | 0.1  |
| Paris            | France          | -0.1         | -0.3 | -0.4 | 0.1          | 0.3  | 0.1  |
| Prague           | Czech Republic  | -0.1         | -0.2 | -0.4 | 0.4          | 0.6  | 0.2  |
| Rabat            | Morocco         | -0.0         | -0.2 | -0.2 | -0.0         | 0.1  | -0.1 |
| Riga             | Latvia          | -0.5         | -0.2 | -0.4 | 0.4          | 0.3  | 0.0  |
| Rome             | Italy           | 0.1          | 0.0  | -0.2 | 0.2          | 0.3  | 0.0  |
| Saint Helier     | Jersey          | -0.1         | -0.3 | -0.3 | 0.1          | 0.1  | -0.1 |
| Saint Peter Port | Guernsey and A. | -0.1         | -0.3 | -0.3 | 0.0          | 0.0  | -0.2 |
| San Marino       | San Marino      | 0.0          | -0.1 | -0.3 | 0.4          | 0.5  | 0.2  |
| Sarajevo         | Bosnia and H.   | 0.0          | -0.2 | -0.2 | 0.5          | 0.5  | 0.2  |
| Skopje           | Macedonia       | 0.0          | -0.2 | -0.2 | 0.4          | 0.6  | 0.2  |
| Sofia            | Bulgaria        | 0.1          | -0.1 | -0.2 | 0.5          | 0.6  | 0.3  |
| Stockholm        | Sweden          | -0.3         | -0.3 | -0.4 | 0.3          | 0.3  | 0.0  |
| Tallinn          | Estonia         | -0.4         | -0.1 | -0.4 | 0.3          | 0.2  | -0.0 |
| Tirana           | Albania         | 0.1          | -0.1 | -0.2 | 0.4          | 0.5  | 0.2  |
| Torshavn         | Faroe Islands   | -0.2         | -0.3 | -0.3 | 0.0          | -0.0 | -0.2 |
| Tripoli          | Libya           | 0.1          | -0.1 | -0.1 | 0.2          | 0.1  | 0.0  |
| Tunis            | Tunisia         | 0.1          | -0.1 | -0.2 | 0.2          | 0.2  | -0.0 |
| Vaduz            | Liechtenstein   | -0.1         | -0.2 | -0.4 | 0.3          | 0.4  | 0.2  |
| Valetta          | Malta           | 0.1          | -0.0 | -0.1 | 0.3          | 0.3  | 0.0  |
| Vatican City     | Vatican City    | 0.1          | 0.0  | -0.2 | 0.2          | 0.3  | 0.0  |
| Vienna           | Austria         | -0.0         | -0.1 | -0.3 | 0.5          | 0.6  | 0.2  |
| Vilnius          | Lithuania       | -0.4         | -0.2 | -0.4 | 0.6          | 0.6  | 0.2  |
| Warsaw           | Poland          | -0.3         | -0.2 | -0.5 | 0.6          | 0.7  | 0.2  |
| Zagreb           | Croatia         | 0.0          | -0.1 | -0.3 | 0.5          | 0.6  | 0.3  |

**Table S23.** Difference between “balanced” estimates  $BM_k$  of mean expected change response (in %), and corresponding direct estimates  $M_k$  for the capital cities of the domain, for relative changes of total precipitation in winter (DJF) and summer (JJA) at the end of the century (2071-2099) compared to the period 1981-2010.

| Season           |                 | DJF          |     |     | JJA          |     |      |
|------------------|-----------------|--------------|-----|-----|--------------|-----|------|
| Capital city     | Country         | $BM_k - M_k$ |     |     | $BM_k - M_k$ |     |      |
|                  |                 | 2.6          | 4.5 | 8.5 | 2.6          | 4.5 | 8.5  |
| Amman            | Jordan          | -11          | -2  | -1  | -24          | -0  | -30  |
| Algiers          | Algeria         | -0           | -3  | 4   | 0            | 8   | 8    |
| Amsterdam        | Netherlands     | 0            | -1  | -1  | -2           | -6  | -5   |
| Andorra la Vella | Andorra         | 3            | -2  | 4   | -7           | -8  | -2   |
| Ankara           | Turkey          | -0           | -2  | 1   | -5           | -8  | -3   |
| Athens           | Greece          | 3            | 1   | 8   | -3           | -1  | -10  |
| Bayrut           | Lebanon         | -7           | -2  | -0  | -15          | -38 | -12  |
| Belgrade         | Serbia and M.   | 1            | -1  | 2   | -6           | -10 | -7   |
| Berlin           | Germany         | -0           | 0   | -2  | -5           | -9  | -8   |
| Bern             | Switzerland     | 1            | 0   | -2  | 1            | -6  | -4   |
| Bratislava       | Slovakia        | -1           | -4  | -0  | -5           | -11 | -3   |
| Brussels         | Belgium         | 1            | -1  | -1  | -4           | -8  | -6   |
| Bucharest        | Romania         | 4            | 1   | 6   | -6           | -12 | -8   |
| Budapest         | Hungary         | -1           | -7  | -3  | -6           | -12 | -3   |
| Cairo            | Egypt           | -8           | 5   | 0   | -9           | -12 | -157 |
| Chisinau         | Moldova         | -2           | -7  | 0   | -8           | -13 | -7   |
| Copenhagen       | Denmark         | 0            | -1  | -0  | -5           | -7  | -7   |
| Damascus         | Syria           | -8           | -5  | -1  | 53           | -90 | 52   |
| Douglas          | Isle of Man     | 1            | -1  | 1   | 1            | 1   | -3   |
| Dublin           | Ireland         | -2           | -4  | -1  | -1           | -4  | -5   |
| Gibraltar        | Gibraltar       | 2            | -6  | -1  | 0            | -4  | -2   |
| Helsinki         | Finland         | -2           | -2  | -4  | -4           | -4  | -3   |
| Jerusalem        | Israel          | -14          | -8  | -4  | -20          | 18  | -20  |
| Kiev             | Ukraine         | -1           | -6  | -1  | -9           | -12 | -7   |
| Lisbon           | Portugal        | -1           | -9  | -4  | 3            | -15 | -7   |
| Ljubljana        | Slovenia        | 1            | -3  | 0   | -3           | -10 | -3   |
| London           | UK              | -2           | -7  | -3  | 2            | -2  | -3   |
| Luxemburg        | Luxembourg      | 2            | -3  | -1  | -6           | -8  | -6   |
| Madrid           | Spain           | 0            | -9  | -4  | -6           | -6  | 2    |
| Minsk            | Belarus         | -3           | -4  | -3  | -8           | -14 | -6   |
| Monaco-Ville     | Monaco          | 7            | -9  | 2   | -1           | -12 | -4   |
| Nicosia          | Cyprus          | -5           | -9  | -4  | 3            | -28 | -9   |
| Oslo             | Norway          | -0           | -5  | -1  | -1           | -6  | -3   |
| Paris            | France          | 3            | -2  | 1   | -4           | -6  | -5   |
| Prague           | Czech Republic  | -2           | -3  | -3  | -2           | -6  | -3   |
| Rabat            | Morocco         | -1           | -7  | 1   | 15           | 18  | 6    |
| Riga             | Latvia          | -1           | -2  | -3  | -3           | -9  | -5   |
| Rome             | Italy           | 1            | -5  | 4   | -1           | -11 | -6   |
| Saint Helier     | Jersey          | -1           | -5  | -2  | 0            | -4  | -5   |
| Saint Peter Port | Guernsey and A. | -2           | -6  | -2  | 1            | -4  | -4   |
| San Marino       | San Marino      | -3           | -4  | 8   | -2           | -10 | -3   |
| Sarajevo         | Bosnia and H.   | -2           | -5  | -3  | -4           | -9  | -4   |
| Skopje           | Macedonia       | 4            | -3  | 4   | 1            | -4  | -4   |
| Sofia            | Bulgaria        | 1            | -2  | 2   | -5           | -8  | -4   |
| Stockholm        | Sweden          | -1           | -5  | -2  | -3           | -7  | -7   |
| Tallinn          | Estonia         | -3           | -2  | -4  | -7           | -10 | -8   |
| Tirana           | Albania         | 2            | 1   | 2   | -1           | -10 | -5   |
| Torshavn         | Faroe Islands   | 1            | -3  | -1  | -2           | -1  | -1   |
| Tripoli          | Libya           | -8           | -4  | -3  | 9            | 9   | -8   |
| Tunis            | Tunisia         | -5           | -7  | 0   | -11          | -12 | -5   |
| Vaduz            | Liechtenstein   | -2           | -2  | -4  | -4           | -8  | -4   |
| Valletta         | Malta           | -3           | -4  | 3   | 1            | -10 | 4    |
| Vatican City     | Vatican City    | 1            | -5  | 4   | -1           | -11 | -6   |
| Vienna           | Austria         | -3           | -7  | -2  | -5           | -8  | -2   |
| Vilnius          | Lithuania       | -2           | -3  | -3  | -7           | -12 | -8   |
| Warsaw           | Poland          | -3           | -2  | -2  | -2           | -10 | -6   |
| Zagreb           | Croatia         | 2            | -2  | 3   | -4           | -9  | -4   |



## 125 **References**

- Christensen, O. B. and Kjellström, E. (2020). Partitioning uncertainty components of mean climate and climate change in a large ensemble of European regional climate model projections. *Climate Dynamics*.
- Déqué, M., Rowell, D. P., Lüthi, D., Giorgi, F., Christensen, J. H., Rockel, B., Jacob, D., Kjellström, E., Castro, M. d., and Hurk, B. v. d. (2007). An intercomparison of regional climate simulations for Europe: assessing uncertainties in model projections. *Climatic Change*, 81(1):53–70.
- 130 Evin, G., Hingray, B., Blanchet, J., Eckert, N., Morin, S., and Verfaillie, D. (2019). Partitioning Uncertainty Components of an Incomplete Ensemble of Climate Projections Using Data Augmentation. *Journal of Climate*, 32(8):2423–2440.
- Hawkins, E. and Sutton, R. (2009). The Potential to Narrow Uncertainty in Regional Climate Predictions. *Bulletin of the American Meteorological Society*, 90(8):1095–1107.
- 135 Hingray, B. and Saïd, M. (2014). Partitioning Internal Variability and Model Uncertainty Components in a Multimember Multimodel Ensemble of Climate Projections. *Journal of Climate*, 27(17):6779–6798.
- Northrop, P. J. and Chandler, R. E. (2014). Quantifying Sources of Uncertainty in Projections of Future Climate. *Journal of Climate*, 27(23):8793–8808.
- Seneviratne, S. I., Nicholls, N., Easterling, D., Goodess, C. M., Kanae, S., Kossin, J., Luo, Y., Marengo, J., Mc Innes, K., Rahimi, M., Reichstein, M., Sorteberg, A., Vera, C., Zhang, X., Rusticucci, M., Semenov, V., Alexander, L. V., Allen, S., Benito, G., Cavazos, T., Clague, J., Conway, D., Della-Marta, P. M., Gerber, M., Gong, S., Goswami, B. N., Hemer, M., Huggel, C., Van den Hurk, B., Kharin, V. V., Kitch, A., Klein Tank, A. M. G., Li, G., Mason, S., Mc Guire, W., Van Oldenborgh, G. J., Orłowsky, B., Smith, S., Thiaw, W., Velegrakis, A., Yiou, P., Zhang, T., Zhou, T., and Zwiers, F. W. (2012). Changes in climate extremes and their impacts on the natural physical environment. In *Managing the Risks of Extreme Events and Disasters to Advance Climate Change Adaptation*, pages 109–230. Cambridge University Press. Num Pages: 122.
- 140 Yip, S., Ferro, C. A. T., Stephenson, D. B., and Hawkins, E. (2011). A Simple, Coherent Framework for Partitioning Uncertainty in Climate Predictions. *Journal of Climate*, 24(17):4634–4643.
